# Supplementary material for: On/off electrochemical switches based on quinone-bisketals
Source: Royal Society of Chemistry journal article supplement (doi:10.1039/c0cc04388e), 2010-11-29
Supplement: c0cc04388e.pdf [file c0cc04388e.pdf]

## Electronic Supplementary Information:

### *on/off* Electrochemical switches based on quinone-bisketals

Noelia Fuentes,<sup>a</sup> Luis Álvarez de Cienfuegos,<sup>a</sup> Andrés Parra,<sup>a</sup> Duane Choquesillo-Lazarte,<sup>b</sup> Juan M. García-Ruiz,<sup>b</sup> M. Luisa Marcos,<sup>c</sup> Elena Buñuel,<sup>d</sup> Maria Ribagorda,<sup>d</sup> M. Carmen Carreño,<sup>\*d</sup> Diego J. Cárdenas,<sup>\*d</sup> and Juan M. Cuerva<sup>\*a</sup>

*Departamento de Química Orgánica,<sup>a</sup> Universidad de Granada, Campus Fuentenueva s/n, E-18071 Granada (Spain). Laboratorio de Estudios Cristalográficos IACT,<sup>b</sup> CSIC- Universidad de Granada, 18100, Granada (Spain). Departamento de Química (Módulo 9),<sup>c</sup> y Departamento de Química Orgánica (Módulo 1),<sup>d</sup> Universidad Autónoma de Madrid, c/ Francisco Tomás y Valiente 7, Cantoblanco, E-28049, Madrid (Spain).*

### **Contents**

|                                                                                                  |                |
|--------------------------------------------------------------------------------------------------|----------------|
| General details                                                                                  | <b>S2</b>      |
| Synthesis of <i>p</i> -dialkoxybenzenes ( <b>1 - 10</b> )                                        | <b>S2-S9</b>   |
| General procedure for Anodic Oxidation<br>and synthesis of quinone bisketals ( <b>1a – 10a</b> ) | <b>S10-S12</b> |
| Computational methods                                                                            | <b>S13-S37</b> |
| X- Ray Structural analysis                                                                       | <b>S38</b>     |
| Copies of <sup>1</sup> H NMR and <sup>13</sup> C NMR of new compounds                            | <b>S38-S75</b> |
| Copies of UV                                                                                     | <b>S76-S80</b> |
| Copies of cyclic voltammograms                                                                   | <b>S80-S93</b> |

**General details.**  $^1\text{H}$  NMR and  $^{13}\text{C}$  NMR spectra were recorded on a NMR Variant 400 L900, Variant 500 L900 and AV-300 Bruker spectrometers in  $\text{CDCl}_3$ ,  $\text{CD}_3\text{OD}$  or  $\text{DMSO}-d_6$  with tetramethylsilane as an internal standard. Data are reported as follows: chemical shift in ppm, multiplicity (s = singlet, d = doublet, t = triplet, q = quartet and m = multiplet) coupling constant (Hz), integration, and interpretation. Peak assignments were made with the aid of DEPT method. Ultraviolet spectra (UV) were obtained on a Helyos  $\alpha$  spectrometer. High resolution mass spectra (HRMS) were obtained by electrospray technique using a QSTAR (Applied Biosystems) instrument and by FAB technique using a VG AutoSpec instrument. The following known compounds were isolated as pure samples and showed NMR spectra matching those of the reported compounds: **1**,<sup>1</sup> **2**,<sup>2</sup> **4**,<sup>3</sup> **7**,<sup>4</sup> **11**,<sup>5</sup> **12**,<sup>6</sup> **15**,<sup>7</sup> and **17**.<sup>8</sup>

---

<sup>1</sup> J. E. Klare, G. S. Tulevski and C. Nuckolls, *Langmuir* 2004, **20**, 10068-10072.

<sup>2</sup> D. Yue, T. Yao and R. C. Larock, *J. Org. Chem.* 2005, **70**, 10292-10296.

<sup>3</sup> N. Sanyal and P. M. Lahti, *Cryst. Growth Des.* 2006, **6**, 1253-1255

<sup>4</sup> A. Palmgren, A. Thorarensen, A. and J. Bäckvall, *J. Org. Chem.* 1998, **63**, 3764-3768.

<sup>5</sup> S. M. Waybright, C. P. Singleton, K. Wachter, C. J. Murphy and U. H. F. Bunz, *J. Am. Chem. Soc.* 2001, **123**, 1828-1833.

<sup>6</sup> S-H. Hsiao, Y.-H. Chang, *J. Polym. Sci. Part. A: Polym. Chem.* 2004, **42**, 1255-1271.

<sup>7</sup> J. P. Amara and T. M. Swager, *Macromolecules* 2005, **38**, 9091-9094.

<sup>8</sup> H. Tsuji, C. Mitsui, L. Ilies, Y. Sato and E. Nakamura, *J. Am. Chem. Soc.* 2007, **129**, 11902-11903.

## Synthesis of *p*-dialkoxybenzenes (1-8).

### Synthesis of compound 1.

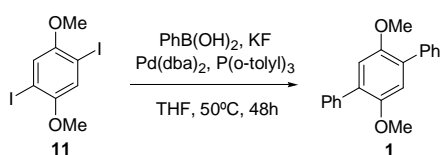

A mixture of phenyl boronic acid (469 mg, 3.84 mmol), 2,5-diiodo-1,4-dimethoxybenzene **11** (500 mg, 1.28 mmol), KF (446 mg, 7.69 mmol), Pd(dba)<sub>2</sub> (73 mg, 0.13 mmol) and P(*o*-tolyl)<sub>3</sub> (78 mg, 0.26 mmol) in THF (20 mL) was warmed to 55 °C and stirred for 48 h under argon. The reaction was then diluted with EtOAc, washed with brine, dried over anhydrous Na<sub>2</sub>SO<sub>4</sub>, and the solvent removed. The residue was submitted to flash chromatography (EtOAc/Hexane: 1/9) to give **1** (340 mg, 91 %) as a white solid.

### Synthesis of compound 2.

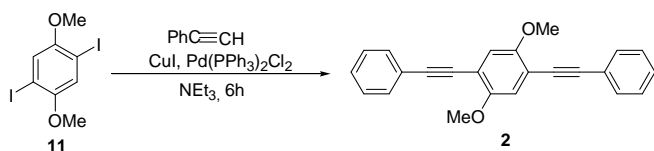

CuI (7 mg, 0.04 mmol) was added to a solution of Et<sub>3</sub>N (6 mL), Pd(PPh<sub>3</sub>)<sub>2</sub>Cl<sub>2</sub> (54 mg, 0.08 mmol), phenyl acetylene (188 mg, 1.85 mmol) and 2,5-diiodo-1,4-dimethoxybenzene **11** (300 mg, 0.77 mmol), stirred for 5 min beforehand under argon. The reaction was allowed to stir at room temperature for 6h and the resulting solution was filtered, washed with 10 % aqueous HCl solution, and extracted with diethyl ether (3 x 10 mL). The combined ether fractions were dried over anhydrous Na<sub>2</sub>SO<sub>4</sub>, concentrated under vacuum, and the crude product submitted to flash chromatography (EtOAc/Hexane: 1/9) to give **2** (200 mg, 77 %) as a yellow solid.

### Synthesis of compound 3.

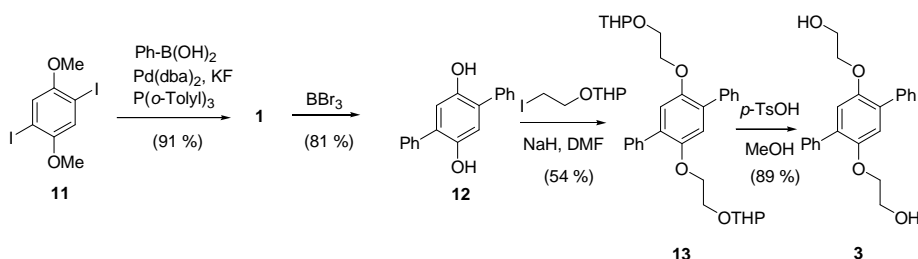

*Synthesis of compound 12.* A solution of boron tribromide 1M in CH<sub>2</sub>Cl<sub>2</sub> (5.48 mL, 5.48 mmol) was slowly added to **1** (530 mg, 1.83 mmol) in dry CH<sub>2</sub>Cl<sub>2</sub> (75 mL) at -78 °C. The reaction mixture was stirred under argon at room temperature for 48 h. Then, water (50 mL) was slowly added, the organic layers were collected, dried over Na<sub>2</sub>SO<sub>4</sub> and evaporated to dryness. The residue was purified by column chromatography (EtOAc/Hexane: 3/7) to give **12** (388 mg, 81 %) as a white solid.

**Synthesis of compound 13.** A sample of I(CH<sub>2</sub>)<sub>2</sub>OTHP<sup>9</sup> (834 mg, 3.26 mmol) was added to a mixture of NaH (178 mg, 4.44 mmol) and hydroquinone **12** (388 mg, 1.49 mmol) in DMF (25 mL). The resulting solution was stirred at room temperature for 12 h and then diluted with EtOAc, washed with 10 % aqueous HCl solution, dried over anhydrous Na<sub>2</sub>SO<sub>4</sub>, and concentrated. The residue was submitted to flash chromatography (EtOAc/Hexane: 4/6) to give **13** (420 mg, 54 %) as a colourless oil: <sup>1</sup>H NMR (400 MHz, CDCl<sub>3</sub>) δ 7.63 (dd, *J* = 8.4, 1.3 Hz, 4H), 7.42 (t, *J* = 8.4 Hz, 4H), 7.34-7.31 (m, 2H), 7.04 (s, 2H), 4.59 (t, *J* = 3.4 Hz, 2H), 4.12 (t, *J* = 5.0 Hz, 4H), 3.94 (dt, *J* = 11.2, 4.4 Hz, 2H), 3.80-3.76 (m, 2H), 3.69 (dt, *J* = 11.2, 5.2 Hz, 2H), 3.44-3.41 (m, 2H), 1.81-1.75 (m, 2H), 1.68-1.46 (m, 10H); <sup>13</sup>C NMR (125 MHz, CDCl<sub>3</sub>; DEPT) δ 150.4 (C), 138.3 (C), 131.1 (C), 129.6 (CH), 128.0 (CH), 127.0 (CH), 116.8 (CH), 99.0 (CH), 69.2 (CH<sub>2</sub>), 66.0 (CH<sub>2</sub>), 62.0 (CH<sub>2</sub>), 30.6 (CH<sub>2</sub>), 25.5 (CH<sub>2</sub>), 19.3 (CH<sub>2</sub>); HRMS FAB: *m/z* calcd. for C<sub>32</sub>H<sub>38</sub>O<sub>6</sub> [M]<sup>+</sup> 518.2668, found *m/z* 518.2664.

**Synthesis of compound 3.** *p*-Toluensulfonic acid (46 mg, 0.24 mmol) was added to a solution of THP-derivative **13** (420 mg, 0.81 mmol) in MeOH (20 mL). The resulting mixture was stirred for 2 h, and then diluted with EtOAc, washed with brine, dried over anhydrous Na<sub>2</sub>SO<sub>4</sub>, and the solvent removed. The residue was submitted to flash chromatography (EtOAc/Hexane: 1/1) to give **3** (274 mg, 89 %) as a white solid: <sup>1</sup>H NMR (400 MHz, CDCl<sub>3</sub>) δ 7.57 (d, *J* = 8.0 Hz, 4H), 7.45 (t, *J* = 8.0 Hz, 4H), 7.37 (t, *J* = 8.0 Hz, 2H), 7.03 (s, 2H), 4.04 (t, *J* = 4.0 Hz, 4H), 3.78 (t, *J* = 4.0 Hz, 4H); <sup>13</sup>C NMR (125 MHz, CDCl<sub>3</sub>; DEPT) δ 150.5 (C), 138.2 (C), 132.1 (C), 129.6 (CH), 128.6 (CH), 127.7 (CH), 117.6 (CH), 71.6 (CH<sub>2</sub>), 61.7 (CH<sub>2</sub>); HRMS ES: *m/z* calcd. for C<sub>22</sub>H<sub>22</sub>O<sub>4</sub>Na [M+Na]<sup>+</sup> 373.1416, found *m/z* 373.1410.

#### **Synthesis of compound 4.**

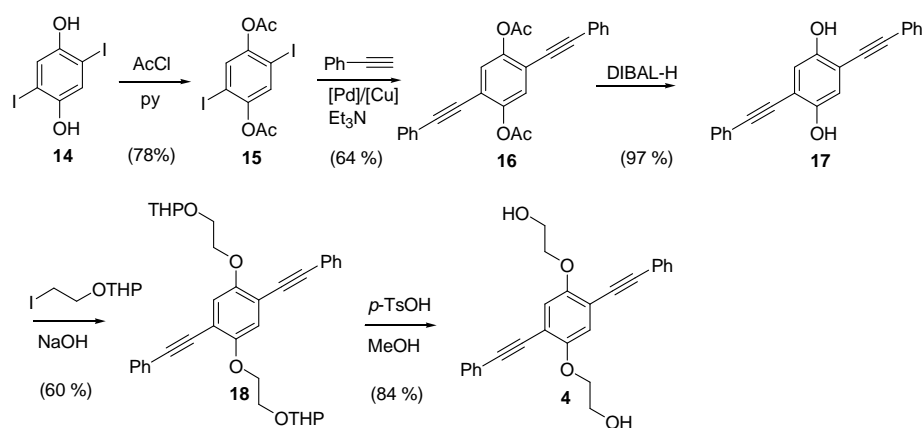

**Synthesis of compound 15.** Pyridine (3.2 g, 32 mmol) was added to a solution of 2,5-diiodohydroquinone **14** (2.1 g, 5.29 mmol) in dry CH<sub>2</sub>Cl<sub>2</sub> (30 mL). The solution was cooled to 0 °C and then acetyl chloride (1.7 g, 21.32 mmol) was added. The reaction was stirred for 3 h at room temperature. MeOH (10 mL) was then added and the resulting mixture was stirred for another 5 min, and subsequently the solvent removed. The residue was diluted with EtOAc, washed with brine, dried over anhydrous Na<sub>2</sub>SO<sub>4</sub>, and concentrated under vacuum. The crude was submitted to flash chromatography (EtOAc/Hexane: 4/6) to give **15** (1.8 g, 78 %) as a brown solid.

<sup>9</sup> It was prepared from OH(CH<sub>2</sub>)<sub>2</sub>OTHP according to known procedure: J. Garegg and B. Samuelsson, *J. Chem. Soc. Perkin I.* 1980, 2866-2869. I(CH<sub>2</sub>)<sub>2</sub>OTHP was isolated as pure sample and showed NMR spectra identical to those reported: J. H. Bushweller and P. A. Bartlett, *J. Org. Chem.* 1989, **54**, 2404-2409.

*Synthesis of compound 16.* CuI (33 mg, 0.17 mmol) was added to a solution of Et<sub>3</sub>N (10 mL), PdCl<sub>2</sub>(PPh<sub>3</sub>)<sub>2</sub> (240 mg, 0.34 mmol), phenyl acetylene (840 mg, 8.23 mmol) and diacetate **15** (1.5 g, 3.43 mmol), stirred for 5 min beforehand under argon. The mixture was allowed to stir at room temperature for 6 h and the resulting solution was diluted with CH<sub>2</sub>Cl<sub>2</sub>, washed with brine, dried over anhydrous Na<sub>2</sub>SO<sub>4</sub> and concentrated under vacuum. Recrystallization from EtOAc gave the diacetate **16** (864 mg, 64 %) as orange needles. <sup>1</sup>H NMR (400 MHz, CDCl<sub>3</sub>) δ 7.43-7.40 (m, 4H), 7.30-7.28 (m, 6H), 7.19 (s, 2H), 2.30 (s, 6H); <sup>13</sup>C NMR (125 MHz, CDCl<sub>3</sub>; DEPT) δ 168.5 (C), 148.8 (C), 131.6 (CH), 128.9 (CH), 128.5 (CH), 126.2 (CH), 122.5 (C), 118.5 (C), 96.4 (C), 83.5 (C), 20.7 (CH<sub>3</sub>); HRMS ES: *m/z* calcd. for C<sub>26</sub>H<sub>18</sub>O<sub>4</sub>Na [M+Na]<sup>+</sup> 417.1103, found *m/z* 417.1097.

*Synthesis of compound 17.* DIBAL-H (548 mg, 3.80 mmol) was added dropwise to a deoxygenated solution of **16** (250 mg, 0.63 mmol) in THF (20 mL) under argon at 0 °C. The mixture was stirred at room temperature for 2 h and, then, diluted with EtOAc, washed with brine, dried over anhydrous Na<sub>2</sub>SO<sub>4</sub>, and the solvent removed. The residue was submitted to flash chromatography (EtOAc/Hexane: 3/7) to give hydroquinone **17** (190 mg, 97 %) as a yellow solid.

*Synthesis of compound 18.* Hydroquinone **17** (152 mg, 0.43 mmol) was slowly added to a mixture of NaH (31 mg, 1.29 mmol) and I(CH<sub>2</sub>)<sub>2</sub>OTHP<sup>5</sup> (243 mg, 0.95 mmol) in DMF (25 mL). The resulting solution was stirred at room temperature for 4 h and then diluted with EtOAc, washed with brine, dried over anhydrous Na<sub>2</sub>SO<sub>4</sub>, and the solvent removed. The residue was submitted to flash chromatography (EtOAc/Hexane: 5/95) to give **18** (420 mg, 54 %) as a colorless oil. <sup>1</sup>H NMR (400 MHz, CDCl<sub>3</sub>) δ 7.54-7.53 (m, 4H), 7.35-7.33 (m, 6H), 7.09 (s, 2H), 4.78 (t, *J* = 2.8 Hz, 2H), 4.24 (t, *J* = 3.0 Hz, 4H), 4.11-4.06 (m, 2H), 3.94-3.85 (m, 4H), 3.51-3.45 (m, 2H), 1.81-1.74 (m, 2H), 1.73-1.46 (m, 10H); <sup>13</sup>C NMR (125 MHz, CDCl<sub>3</sub>; DEPT) δ 153.7 (C), 131.6 (CH), 128.4 (CH), 128.3 (CH), 123.4 (C), 117.4 (CH), 114.3 (C), 99.0 (CH), 94.9 (C), 85.7 (C), 69.3 (CH<sub>2</sub>), 65.8 (CH<sub>2</sub>), 61.9 (CH<sub>2</sub>), 30.5 (CH<sub>2</sub>), 25.4 (CH<sub>2</sub>), 19.2 (CH<sub>2</sub>); HRMS ES: *m/z* calcd. for C<sub>36</sub>H<sub>38</sub>O<sub>6</sub>Na [M+Na]<sup>+</sup> 589.2566, found *m/z* 589.2560.

*Synthesis of compound 4.* *p*-Toluensulfonic acid (14 mg, 0.07 mmol) was added to a solution of THP-derivative **18** (150 mg, 0.25 mmol) in MeOH (15 mL). The resulting mixture was stirred for 2 h, and then diluted with EtOAc, washed with brine, dried over anhydrous Na<sub>2</sub>SO<sub>4</sub>, and the solvent removed. The residue was submitted to flash chromatography (EtOAc/Hexane: 6/4) to give **4** (87 mg, 84 %) as a yellow solid.

### Synthesis of compound 5.

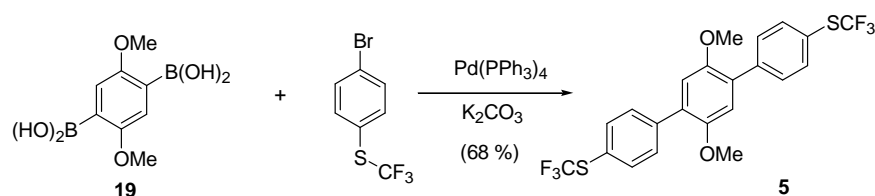

A mixture of 2,5-dimethoxy-1,4-benzenediboronic acid **19**<sup>10</sup> (80 mg, 0.36 mmol), 1-bromo-4-(trifluoromethylthio)benzene (232 mg, 0.90 mmol), potassium carbonate (150 mg, 1.08 mmol) and Pd(PPh<sub>3</sub>)<sub>4</sub> (12 mg, 0.01 mmol) in DMSO (12 mL) was heated at 100 °C for 72 h under argon. The reaction was partitioned between water and EtOAc, the organic layer was dried over Na<sub>2</sub>SO<sub>4</sub>, filtrated and concentrated. The residue was submitted to flash chromatography (EtOAc/Hexane: 1/9) to give **5** (121 mg, 68 %) as a white solid. <sup>1</sup>H NMR (400 MHz, CDCl<sub>3</sub>) δ 7.71 (d, *J* = 8.8 Hz, 4H), 7.64 (d, *J* = 8.8 Hz, 4H), 6.97 (s, 2H), 3.81 (s, 6H); <sup>13</sup>C NMR (125 MHz, CDCl<sub>3</sub>; DEPT) δ 150.7 (C), 140.8 (C), 135.9 (CH), 130.5 (CH), 129.6 (C), 129.6 (q, <sup>1</sup>*J*<sub>C-F</sub> = 240 Hz, C), 123.0 (C), 114.5 (CH), 56.4 (CH<sub>3</sub>); HRMS FAB: *m/z* calcd. for C<sub>22</sub>H<sub>16</sub>F<sub>6</sub>O<sub>2</sub>S<sub>2</sub> [M]<sup>+</sup> 490.0496, found *m/z* 490.0502.

### Synthesis of compound 6.

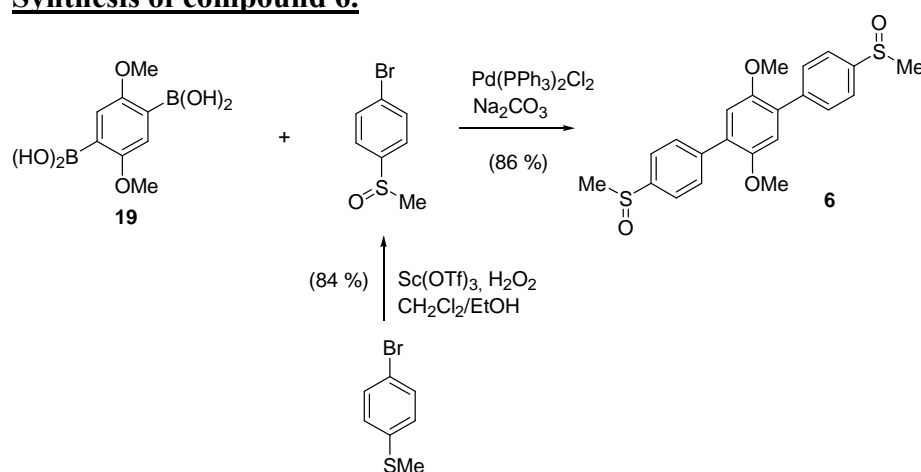

*Synthesis of 4-bromophenylmethylsulfoxide.* H<sub>2</sub>O<sub>2</sub> (30% v/v, 251 mg, 7.39 mmol) was added with stirring to a suspension of Sc(OTf)<sub>3</sub> (145 mg, 0.29 mmol) in a mixture of CH<sub>2</sub>Cl<sub>2</sub>/EtOH (10:1, 1 mL) at room temperature. After 5 min, 4-bromomethylthioanisole (300 mg, 1.49 mmol) was added. The mixture was stirred for 8 h, and then diluted with CH<sub>2</sub>Cl<sub>2</sub>, washed with water, dried over anhydrous Na<sub>2</sub>SO<sub>4</sub>, and the solvent removed. The residue was submitted to flash chromatography (MeOH/CH<sub>2</sub>Cl<sub>2</sub>: 1/49) to give 4-bromophenylmethylsulfoxide<sup>11</sup> (272 mg, 84 %) as a white solid.

*Synthesis of 6.* Degassed 1,4-dioxane was added to a mixture of 2,5-dimethoxy-1,4-benzenediboronic acid **19** (215 mg, 0.95 mmol), 4-bromophenylmethylsulfoxide (543 mg, 2.48 mmol) and Pd(PPh<sub>3</sub>)<sub>2</sub>Cl<sub>2</sub> (67 mg, 0.09 mmol) in a 50 ml round bottom flask under argon atmosphere. The mixture was stirred at 20 °C for 30 min. Degassed aqueous Na<sub>2</sub>CO<sub>3</sub> solution (1 M, 3.8 mL) was added and the reaction mixture was heated at reflux under argon for 72 h. Solvent was then removed under vacuum. The residue was submitted to flash chromatography (MeOH/CH<sub>2</sub>Cl<sub>2</sub>: 1/40) to give **6** (343 mg, 86 %) as a brown solid. <sup>1</sup>H NMR (400 MHz, CDCl<sub>3</sub>) δ 7.75 (d, *J* = 8.5 Hz, 4H), 7.70 (d, *J* = 8.2 Hz, 4H), 6.98 (s, 2H), 3.81 (s, 6H), 2.78 (s, 6H); <sup>13</sup>C NMR (100 MHz, CDCl<sub>3</sub>; DEPT) δ 150.7 (C), 144.3 (C), 141.0 (C), 130.4 (CH), 129.6 (C), 123.4 (CH), 114.5

<sup>10</sup> C. Wang, M. Kilitziraki, J. A. H. MacBride, M. R. Bryce, L. E. Horsburgh, A. K. Sheridan, A. P. Monkman and I. D. W. Samuel, *Adv. Mat.* 2000, **12**, 217-222.

<sup>11</sup> M. Matteucci, G. Bhalay and M. Bradley, *Org. Lett.*, 2003, **5**, 235-237.

(CH), 56.4 (CH<sub>3</sub>), 43.9 (CH<sub>3</sub>); HRMS ES: *m/z* calcd. for C<sub>22</sub>H<sub>23</sub>O<sub>4</sub>S<sub>2</sub> [M+H]<sup>+</sup> 415.1032, found *m/z* 415.1032.

### Synthesis of compound 7.

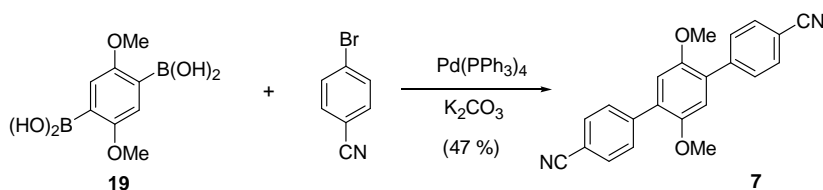

A mixture of 2,5-dimethoxy-1,4-benzenediboronic acid **19** (150 mg, 0.66 mmol), 4-iodobenzonitrile (380.7 mg, 1.66 mmol), K<sub>2</sub>CO<sub>3</sub> (275.6 mg, 1.99 mmol) and Pd(PPh<sub>3</sub>)<sub>4</sub> (22 mg, 0.02 mmol) in degassed DMSO (12 mL) was heated at reflux under argon for 72 h. The reaction was partitioned between water and EtOAc, the organic layer was dried over Na<sub>2</sub>SO<sub>4</sub>, filtrated and concentrated. The residue was submitted to flash chromatography (EtOAc/Hexane: 4/6) to give **7**<sup>12</sup> (106 mg, 47 %) as a white solid.

### Synthesis of compound 8.

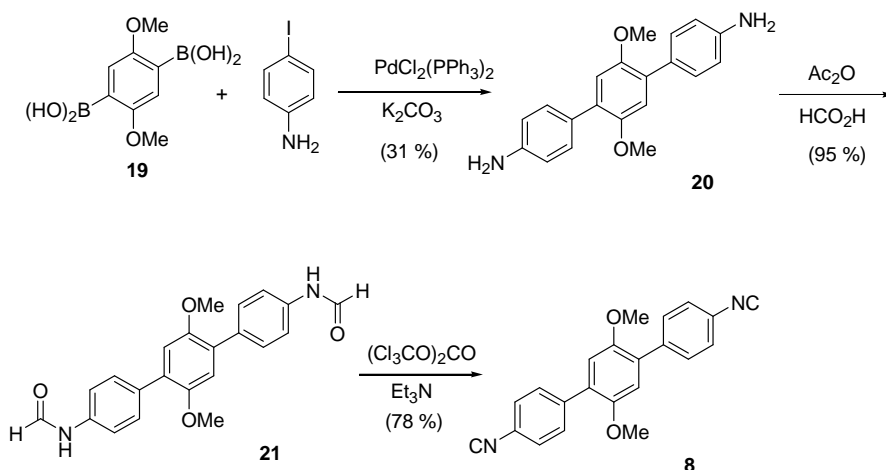

*Synthesis of 20.* Degassed 1,4-dioxane (12 mL) was added to a mixture of 2,5-dimethoxy-1,4-benzenediboronic acid **19** (150 mg, 0.66 mmol), 4-iodoaniline (378.6 mg, 1.73 mmol) and Pd(PPh<sub>3</sub>)<sub>2</sub>Cl<sub>2</sub> (46.6 mg, 0.06 mmol) in a 50 ml round bottom flask under argon atmosphere. The mixture was stirred at 20 °C for 30 min. Degassed aqueous Na<sub>2</sub>CO<sub>3</sub> solution (1 M, 2.6 mL) was added and the reaction mixture was heated at reflux under argon for 72 h. Solvent was then removed under vacuum. The residue was submitted to flash chromatography (EtOAc/Hexane: 4/6) to give **20** (66 mg, 31 %) as a brown solid. <sup>1</sup>H NMR (300 MHz, CDCl<sub>3</sub>) δ 7.41 (d, *J* = 8.4 Hz, 4H), 6.93 (s, 2H), 6.75 (d, *J* = 8.4 Hz, 4H), 3.77 (s, 6H); <sup>13</sup>C NMR (120 MHz, CDCl<sub>3</sub>; DEPT) δ 150.7 (C), 145.5 (C), 130.3 (CH), 129.7 (C), 128.6 (C), 114.8 (CH), 114.5 (CH), 56.5 (CH<sub>3</sub>); HRMS FAB: *m/z* calcd. for C<sub>20</sub>H<sub>20</sub> N<sub>2</sub>O<sub>2</sub> [M]<sup>+</sup> 320.1525, found *m/z* 320.1528.

*Synthesis of 21.* Acetic anhydride (77 mL, 8.14 mmol) was added to an oven-dried round-bottom flask equipped with a reflux condenser under argon. Formic acid (0.24 mL, 6.51 mmol) was then added dropwise. The flask was then heated to 60 °C and

<sup>12</sup> A. Palmgren, A. Thorarensen and J. Bäckvall, *J. Org. Chem.* 1998, **63**, 3764-3768.

stirred for 30 min before being cooled to  $-10\text{ }^{\circ}\text{C}$ . A solution of diamine **20** (434 mg, 1.36 mmol) in THF (20 mL) was slowly added to the reaction mixture, which was then allowed to warm to room temperature and stir overnight. Solvent was removed by rotary evaporation and water was added, yielding a white precipitate which was filtered and washed with water. The material was recrystallized from  $\text{CH}_2\text{Cl}_2$ /hexane to afford **21** (485 mg, 95 %) as a grey solid.  $^1\text{H}$  NMR (400 MHz,  $\text{DMSO}-d_6$ )  $\delta$  10.25 (s, 2H, mayor isomer), 10.19 (d,  $J=10.8$  Hz, 2H, minor isomer), 8.82 (d,  $J=11.6$  Hz, 1H, minor isomer), 8.29 (s, 1H, mayor isomer), 7.63 (d,  $J=8.5$  Hz, 4H, mayor isomer), 7.52 (d,  $J=8.8$  Hz, 4H), 7.24 (d,  $J=8.8$  Hz, 4H, minor isomer), 6.99 (s, 2H), 3.74 (s, 6H);  $^{13}\text{C}$  NMR (100 MHz,  $\text{DMSO}-d_6$ ; DEPT)  $\delta$  163.1 (CH, minor isomer), 160.5 (CH, mayor isomer), 151.1 (C), 138.0 (C, minor isomer), 133.9 (C, mayor isomer), 131.1 (CH, minor isomer), 130.6 (CH, mayor isomer), 130.2 (C), 130.1 (C), 119.7 (CH, mayor isomer), 118.0 (CH, minor isomer), 115.2 (CH), 57.12 ( $\text{CH}_3$ ); HRMS FAB:  $m/z$  calcd. for  $\text{C}_{22}\text{H}_{20}\text{N}_2\text{O}_4$   $[\text{M}]^+$  376.1423, found  $m/z$  376.1429.

**Synthesis of compound 8.** Compound **21** (100 mg, 0.27 mmol) was added to a Schlenk flask containing triphosgene (200 mg, 0.69 mmol). The flask was sealed, evacuated, and back-filled with Argon. The flask was cooled to  $0\text{ }^{\circ}\text{C}$  before the addition of distilled  $\text{CH}_2\text{Cl}_2$  (5 mL) and  $\text{Et}_3\text{N}$  (4 mL) under positive argon pressure. The solution was stirred overnight at room temperature. The reaction mixture was washed with water, dried over anhydrous  $\text{Na}_2\text{SO}_4$ , and the solvent removed. Purification by flash chromatography ( $\text{EtOAc}/\text{Hexane}$ : 1/9) yielded the desired product **8** (71 mg, 78 %) as a orange solid.  $^1\text{H}$  NMR (400 MHz,  $\text{CDCl}_3$ )  $\delta$  7.66-7.56 (m, 4H), 7.44 (d,  $J=8.0$  Hz, 4H), 6.93 (s, 2H), 3.80 (s, 6H);  $^{13}\text{C}$  NMR (125 MHz,  $\text{CDCl}_3$ ; DEPT)  $\delta$  164.5 (C), 150.9 (C), 139.6 (C), 130.7 (CH), 129.6 (C), 126.4 (CH), 114.6 (CH), 56.7 ( $\text{CH}_3$ ); HRMS ES:  $m/z$  calcd. for  $\text{C}_{22}\text{H}_{17}\text{N}_2\text{O}_2$   $[\text{M}+\text{H}]^+$  341.1285, found  $m/z$  341.1284.

### Synthesis of compound 9.

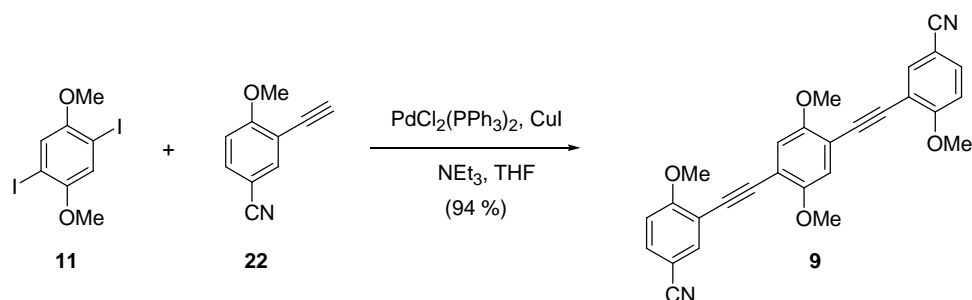

$\text{CuI}$  (4.3 mg, 0.02 mmol) was added to a solution of  $\text{Et}_3\text{N}$  (7 mL),  $\text{Pd}(\text{PPh}_3)_2\text{Cl}_2$  (10.2 mg, 0.01 mmol), 3-ethynyl-4-methoxybenzonitrile (100 mg, 0.64 mmol) and 2,5-diiodo-1,4-dimethoxybenzene **11** (113 mg, 0.28 mmol) in THF (10 mL), stirred for 5 min beforehand under argon. The reaction was allowed to stir at room temperature for 12 h. Then, the resulting solution was diluted with  $\text{EtOAc}$  and washed with a  $\text{NH}_4\text{Cl}$  solution. The organic layer was dried over anhydrous  $\text{Na}_2\text{SO}_4$ , concentrated under vacuum and the crude product submitted to flash chromatography ( $\text{EtOAc}/\text{Hexane}$ : 1/9) to give **9** (122 mg, 94 %) as a yellow solid:  $^1\text{H}$  NMR (400 MHz,  $\text{CDCl}_3$ )  $\delta$  : 7.80 (d,  $J=2.1$  Hz, 2H), 7.59 (dd,  $J=8.6, 2.1$  Hz, 2H), 7.04 (s, 2H), 6.96 (d,  $J=8.6$  Hz, 2H), 3.99 (s, 6H), 3.92 (s, 6H);  $^{13}\text{C}$  NMR (125 MHz,  $\text{CDCl}_3$ ; DEPT)  $\delta$  : 163.2 (C), 154.5 (C), 137.5 (CH), 134.2 (CH), 118.7 (C), 116.1 (CH), 114.6 (C), 113.8 (C), 111.6 (CH), 104.7 (C), 91.7



(C), 89.5 (C), 56.9 (CH<sub>3</sub>), 56.7 (CH<sub>3</sub>); HRMS ES: *m/z* calcd. for C<sub>28</sub>H<sub>20</sub>N<sub>2</sub>O<sub>4</sub>Na [M+Na]<sup>+</sup> 471.1321, found *m/z* 471.1321.

### Synthesis of compound 10.

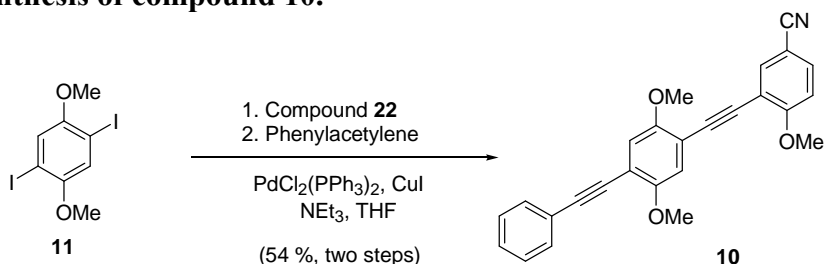

CuI (14.2 mg, 0.09 mmol) was added to a solution of Et<sub>3</sub>N (7 mL), Pd(PPh<sub>3</sub>)<sub>2</sub>Cl<sub>2</sub> (23.4 mg, 0.04 mmol), 3-ethynyl-4-methoxybenzimidazole (150 mg, 0.95 mmol) and 2,5-diiodo-1,4-dimethoxybenzene **11** (745.1 mg, 0.77 mmol) in THF (10 mL), stirred for 5 min beforehand under argon. The reaction was allowed to stir at room temperature for 6 h. Then, phenyl acetylene (433 mg, 4.24 mmol) was added and the resulting mixture was allowed to stir at room temperature for another 12h. EtOAc was added and the solution washed with a NH<sub>4</sub>Cl solution. The organic layer was dried over anhydrous Na<sub>2</sub>SO<sub>4</sub>, concentrated under vacuum and the crude product submitted to flash chromatography (EtOAc/Hexane: 4/6) to give **10** (202 mg, 54 %) as a yellow solid. <sup>1</sup>H NMR (400 MHz, CDCl<sub>3</sub>) δ : 7.79 (d, *J* = 2 Hz, 1H), 7.59-7.55 (m, 3H), 7.37-7.33 (m, 3H), 7.04 (s, 1H), 7.03 (s, 1H), 6.93 (d, *J* = 8.6 Hz, 1H), 3.96 (s, 3H), 3.90 (s, 3H), 3.89 (s, 3H); <sup>13</sup>C NMR (125 MHz, CDCl<sub>3</sub>; DEPT) δ: 163.1 (C), 154.4 (C), 154.2 (C), 137.3 (CH), 134.1 (CH), 132.0 (CH), 128.7 (CH), 128.6 (CH), 123.4 (C), 118.7 (C), 116.0 (CH), 116.0 (CH), 114.5 (C), 114.4 (C), 113.0 (C), 111.6 (CH), 104.5 (C), 96.5 (C), 92.0 (C), 89.1 (C), 85.8 (C), 56.8 (CH<sub>3</sub>), 56.6 (CH<sub>3</sub>); HRMS EI: *m/z* calcd. for C<sub>26</sub>H<sub>19</sub>NO<sub>3</sub> [M]<sup>+</sup> 393.1365, found *m/z* 393.1347.

### General Procedure for Anodic Oxidation

Electrolysis was carried out in a single cell apparatus in a reagent grade MeOH using a circular platinum gauze anode (5 cm x 5 cm in diameter) 45-mesh, a graphite cathode (9 mm x 40 mm), and an AMEL (model 549) power supply. A solution of the corresponding dimethoxybenzene in MeOH with 1 % KOH was anodically oxidized at 0 °C, under constant current (1 A, 2 V). The reaction was monitored by TLC. The methanolic solution was evaporated under reduced pressure, extracted with EtOAc, washed with brine, dried over MgSO<sub>4</sub>, filtered, and concentrated under vacuum. Flash chromatography with Et<sub>3</sub>N pre-treated silica gel afforded the corresponding quinone bisketals **1a-10a**.

**Synthesis of compound 1a.** It was prepared by electrolysis of precursor **1** (200 mg, 0.69 mmol) in 150 mL of MeOH with KOH (300 mg, 5.34 mmol), according to previously described general procedure, for 80 min. The compound was purified by flash chromatography (EtOAc/Hexane: 1/9) to give **1a** (219 mg, 87 %) as a white solid. <sup>1</sup>H NMR (300 MHz, CDCl<sub>3</sub>) δ 7.78-7.74 (m, 4H), 7.34-7.33 (m, 6H), 6.36 (s, 2H), 3.28 (s, 12H); <sup>13</sup>C NMR (75 MHz, CDCl<sub>3</sub>; DEPT) δ 142.7 (C), 136.7 (C), 131.5 (CH), 128.4 (CH), 128.3 (CH), 128.0 (CH), 97.6 (C), 51.1 (CH<sub>3</sub>); HRMS ES: *m/z* calcd. for C<sub>22</sub>H<sub>24</sub>O<sub>4</sub>Na [M+Na]<sup>+</sup> 375.1572, found *m/z* 375.1566.

**Synthesis of compound 2a.** It was prepared by electrolysis of precursor **2** (200 mg, 0.59 mmol) in 150 mL of MeOH with KOH (300 mg, 5.34 mmol) according to previously described general procedure for 80 min. The compound was purified by flash chromatography (EtOAc/Hexane: 2/98) to give **2a** (174 mg, 74 %) as a white solid. <sup>1</sup>H NMR (300 MHz, CDCl<sub>3</sub>) δ 7.56-7.48 (m, 4H), 7.35-7.25 (m, 6H), 6.45 (s, 2H), 3.40 (s, 12H); <sup>13</sup>C NMR (75 MHz, CDCl<sub>3</sub>; DEPT) δ 137.1 (CH), 131.9 (CH), 128.7 (CH), 128.3 (CH), 127.9 (C), 122.7 (C), 94.7 (C), 92.8 (C), 84.8 (C), 51.4 (CH<sub>3</sub>); HRMS ES: *m/z* calcd. for C<sub>26</sub>H<sub>24</sub>O<sub>4</sub>Na [M+Na]<sup>+</sup> 423.1572, found *m/z* 423.1566.

### Synthesis of compound 3a.

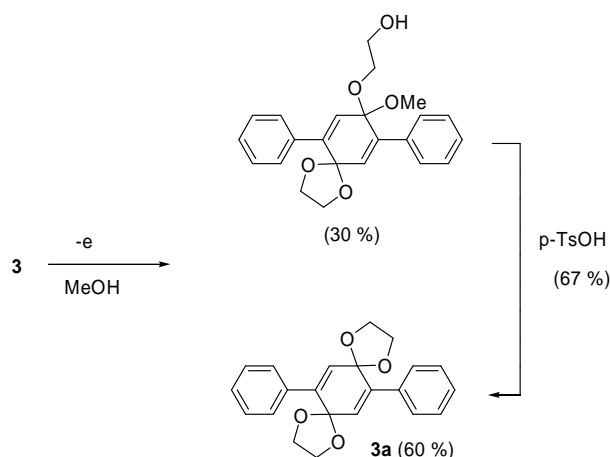

It was prepared by electrolysis of precursor **3** (220 mg, 0.628 mmol) in 80 mL of MeOH with KOH (632 mg, 11.26 mmol) according to previously described general procedure for 2 h. The compound was purified by flash chromatography (EtOAc/Hexane: 2/8) to give acyclic ketal (80 mg, 30 %) and **3a** (132 mg, 60 %). The acyclic ketal (80 mg, 0.19 mmol) was treated with *p*-toluenesulfonic acid (6 mg, 0.03 mmol) in ether to give **3a** (45

mg, 67 %) as a white solid.  $^1\text{H}$  NMR (300 MHz,  $\text{CDCl}_3$ )  $\delta$  7.50-7.49 (m, 4H), 7.34-7.32 (m, 6H), 5.92 (s, 2H), 3.97 (m, 4H), 3.70 (m, 4H);  $^{13}\text{C}$  NMR (75 MHz,  $\text{CDCl}_3$ ; DEPT)  $\delta$  141.1 (C), 138.4 (C), 131.7 (CH), 129.6 (CH), 128.1 (CH), 127.9 (CH), 101.6 (C), 66.0 ( $\text{CH}_2$ ); HRMS FAB:  $m/z$  calcd. for  $\text{C}_{22}\text{H}_{21}\text{O}_4$   $[\text{M}+\text{H}]^+$  349.1440, found  $m/z$  349.1436.

#### Synthesis of compound 4a

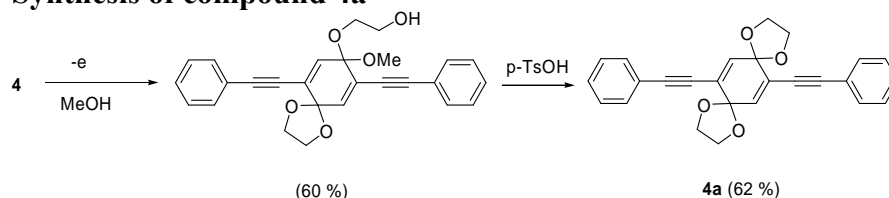

Compound **4a** was prepared by electrolysis of precursor **4** (80 mg, 0.20 mmol) in 80 mL of MeOH with KOH (632 mg, 11.26 mmol) according to previously described general procedure for 2h. The compound was purified by flash chromatography (EtOAc/Hexane: 2/8) to give acyclic ketal (52 mg, 60 %). This compound (52 mg, 0.12 mmol) was treated with *p*-toluensulfonic acid (4 mg, 0.02 mmol) in ether to give **4a** (29 mg, 62 %) as a yellow solid.  $^1\text{H}$  NMR (500 MHz,  $\text{CDCl}_3$ )  $\delta$  7.45-7.43 (m, 4H), 7.33-7.32 (m, 6H), 6.21 (s, 2H), 4.37-4.34 (m, 4H), 4.16-4.13 (m, 4H);  $^{13}\text{C}$  NMR (125 MHz,  $\text{CDCl}_3$ ; DEPT)  $\delta$  135.7 (CH), 131.7 (CH), 128.7 (CH), 128.5 (CH), 126.3 (C), 122.7 (C), 99.5 (C), 92.3 (C), 85.3 (C), 66.8( $\text{CH}_2$ ). A good quality mass spectrum for this compound could not be obtained.

**Synthesis of compound 5a.** Compound **5a** was prepared by electrolysis of precursor **5** (50 mg, 0.10 mmol) in 110 mL of MeOH with KOH (790 mg, 14.08 mmol) according to previously described general procedure for 2h. The compound was purified by flash chromatography (EtOAc/Hexane: 2/98) to give **5a** (51 mg, 90 %) as a white solid.  $^1\text{H}$  NMR (400 MHz,  $\text{CDCl}_3$ )  $\delta$  7.82 (d,  $J = 8.2$  Hz, 4H), 7.66 (d,  $J = 8.2$  Hz, 4H), 6.45 (s, 2H), 3.30 (s, 12H);  $^{13}\text{C}$  NMR (75 MHz,  $\text{CDCl}_3$ ; DEPT)  $\delta$  141.9 (C), 139.2(C), 136.3(CH), 132.3 (CH), 130.0 (q,  $^1J_{\text{C-F}} = 260$  Hz, C) 129.2 (CH), 124.4 (C), 97.3 (C), 51.3 ( $\text{CH}_3$ ); HRMS ES:  $m/z$  calcd. for  $\text{C}_{24}\text{H}_{22}\text{F}_6\text{O}_4\text{S}_2\text{Na}$   $[\text{M}+\text{Na}]^+$  575.0761, found  $m/z$  575.0755.

**Synthesis of compound 6a.** Compound **6a** was prepared by electrolysis of precursor **6** (50 mg, 0.12 mmol) in 80 mL of MeOH with KOH (632 mg, 11.26 mmol) according to previously described general procedure for 3 h. The compound was purified by flash chromatography (MeOH/ $\text{CH}_2\text{Cl}_2$ : 1/40) to give **6a** (42 mg, 72 %) as a white solid.  $^1\text{H}$  NMR (500 MHz,  $\text{CD}_3\text{OD}$ )  $\delta$  8.01 (d,  $J = 10.0$  Hz, 4H), 7.72 (d,  $J = 10.0$  Hz, 4H), 6.57 (s, 2H), 3.30 (s, 12H), 2.83 (s, 6H);  $^{13}\text{C}$  NMR (125 MHz,  $\text{CD}_3\text{OD}$ ; DEPT)  $\delta$  146.7 (C), 144.1 (C), 142.1 (C), 134.5 (CH), 131.3 (CH), 128.6 (CH), 99.4 (C), 52.4 ( $\text{CH}_3$ ), 44.4( $\text{CH}_3$ ); HRMS ES:  $m/z$  calcd. for  $\text{C}_{24}\text{H}_{28}\text{O}_6\text{S}_2\text{Na}$   $[\text{M}+\text{Na}]^+$  499.1225, found  $m/z$  499.1219.

**Synthesis of compound 7a.** Compound **7a** was prepared by electrolysis of precursor **7** (45 mg, 0.13 mmol) in 300 mL of MeOH with KOH (2.3 g, 42.24 mmol) according to previously described general procedure for 22 h. The compound was purified by flash chromatography (EtOAc/Hexane: 3/7) to give starting **7** (14 mg) and bisketal **7a** (29 mg, 54 %, 87 % bsmr) as a white solid.  $^1\text{H}$  NMR (300 MHz,  $\text{CDCl}_3$ )  $\delta$ : 7.87 (d,  $J = 8.1$  Hz, 4H), 7.67 (d,  $J = 8.1$  Hz, 4H), 6.47 (s, 2H), 3.29 (s, 12H);  $^{13}\text{C}$  NMR (75 MHz,  $\text{CDCl}_3$ ; DEPT)  $\delta$ : 141.5 (C), 141.0 (C), 132.5 (CH), 132.3 (CH), 128.9 (CH), 118.7 (C),

112.5 (C), 97.1 (C), 51.3 (CH<sub>3</sub>); HRMS ES: *m/z* calcd. for C<sub>24</sub>H<sub>22</sub>N<sub>2</sub>O<sub>4</sub>Na [M+Na]<sup>+</sup> 425.1477, found *m/z* 425.1471.

**Synthesis of compound 8a.** Compound **8a** was prepared by electrolysis of precursor **8** (37 mg, 0.11 mmol) in 200 mL of MeOH with KOH (1.5 g, 28.16 mmol) according to previously described general procedure for h. The compound was purified by flash chromatography (EtOAc/Hexane: 3/7) to give **8a** (24 mg, 56 %) as a white solid. <sup>1</sup>H NMR (300 MHz, CDCl<sub>3</sub>) δ 7.80 (d, *J* = 8.6 Hz, 4H), 7.39 (d, *J* = 8.6 Hz, 4H), 6.40 (s, 2H), 3.28 (s, 12H); <sup>13</sup>C NMR (125 MHz, CDCl<sub>3</sub>; DEPT) δ 164.9 (C), 141.4 (C), 137.4 (C), 131.7 (CH), 128.9 (CH), 126.2 (CH), 97.0 (C), 51.0 (CH<sub>3</sub>), (one carbon signal was not observed); HRMS ES: *m/z* calcd. for C<sub>24</sub>H<sub>22</sub>N<sub>2</sub>O<sub>4</sub>Na [M+Na]<sup>+</sup> 425.1477, found *m/z* 425.1471.

**Synthesis of compound 9a.** Compound **9a** was prepared by electrolysis of **9** (50 mg, 0.11 mmol) in 180 mL of MeOH with 600 mg of KOH (10.7 mmol) according to previously described general procedure [25200 C, 75 % current efficiency]. The compound was purified by flash chromatography (EtOAc/Hexane: 3/7) to give **9a** (32 mg, 57 %), (78% bsmr) as a yellow solid. <sup>1</sup>H NMR (300 MHz, CDCl<sub>3</sub>) δ : 7.75 (d, *J* = 2.2 Hz, 2H), 7.60 (dd, *J* = 8.6, 2.2 Hz, 2H), 6.93 (d, *J* = 8.6 Hz, 2H), 6.51 (s, 2H), 3.95 (s, 6H), 3.42 (s, 12H); <sup>13</sup>C NMR (75 MHz, CDCl<sub>3</sub>; DEPT) δ : 163.5 (C), 138.0 (CH), 137.6 (CH), 134.5 (CH), 127.7 (C), 118.6 (C), 114.0 (C), 111.7 (CH), 104.5 (C), 94.8 (C), 90.9 (C), 87.2 (C), 56.6 (CH<sub>3</sub>), 51.7 (CH<sub>3</sub>); HRMS ES: *m/z* calcd. for C<sub>30</sub>H<sub>26</sub>N<sub>2</sub>O<sub>6</sub>Na [M+Na]<sup>+</sup> 536.1689, found *m/z* 533.1676.

**Synthesis of compound 10a.** Compound **10a** was prepared by electrolysis of **10** (80 mg, 0.20 mmol) in 80 mL of MeOH with 600 mg of KOH (10.7 mmol) according to previously described general procedure [7200 C, 100 % current efficiency]. The compound was purified by flash chromatography (EtOAc/Hexane: 2/8) to give **10a** (53 mg, 82 %), as a yellow solid. <sup>1</sup>H NMR (300 MHz, CDCl<sub>3</sub>) δ : 7.74 (d, *J* = 3.5 Hz, 1H), 7.59 (dd, *J* = 9.2, 3.5 Hz, 1H), 7.53-7.49 (m, 2H), 7.34-7.32 (m, 3H), 6.90 (d, *J* = 9.2 Hz, 1H), 6.49 (s, 1H), 6.47 (s, 1H), 3.80 (s, 3H), 3.42 (s, 6H), 3.40 (s, 6H); <sup>13</sup>C NMR (75 MHz, CDCl<sub>3</sub>; DEPT) δ: 163.4 (C), 138.2 (CH), 137.6 (CH), 137.3 (CH), 134.5 (CH), 132.2 (CH), 129.0 (CH), 128.6 (CH), 128.0 (C), 127.9 (C), 123.0 (C), 118.6 (C), 114.0 (C), 111.6 (CH), 104.5 (C), 95.0 (C), 94.9 (C), 93.3 (C), 90.9 (C), 87.1 (C), 85.0 (C), 56.6 (CH<sub>3</sub>), 51.7 (CH<sub>3</sub>); HRMS ES: *m/z* calcd. for C<sub>28</sub>H<sub>25</sub>NO<sub>5</sub>Na [M+Na]<sup>+</sup> 478.1630, found *m/z* 478.1625.

## COMPUTATIONAL METHODS

Gaussian 03, Revision E.01,

M. J. Frisch, G. W. Trucks, H. B. Schlegel, G. E. Scuseria, M. A. Robb, J. R. Cheeseman, J. A. Montgomery, Jr., T. Vreven, K. N. Kudin, J. C. Burant, J. M. Millam, S. S. Iyengar, J. Tomasi, V. Barone, B. Mennucci, M. Cossi, G. Scalmani, N. Rega, G. A. Petersson, H. Nakatsuji, M. Hada, M. Ehara, K. Toyota, R. Fukuda, J. Hasegawa, M. Ishida, T. Nakajima, Y. Honda, O. Kitao, H. Nakai, M. Klene, X. Li, J. E. Knox, H. P. Hratchian, J. B. Cross, V. Bakken, C. Adamo, J. Jaramillo, R. Gomperts, R. E. Stratmann, O. Yazyev, A. J. Austin, R. Cammi, C. Pomelli, J. W. Ochterski, P. Y. Ayala, K. Morokuma, G. A. Voth, P. Salvador, J. J. Dannenberg, V. G. Zakrzewski, S. Dapprich, A. D. Daniels, M. C. Strain, O. Farkas, D. K. Malick, A. D. Rabuck, K. Raghavachari, J. B. Foresman, J. V. Ortiz, Q. Cui, A. G. Baboul, S. Clifford, J. Cioslowski, B. B. Stefanov, G. Liu, A. Liashenko, P. Piskorz, I. Komaromi, R. L. Martin, D. J. Fox, T. Keith, M. A. Al-Laham, C. Y. Peng, A. Nanayakkara, M. Challacombe, P. M. W. Gill, B. Johnson, W. Chen, M. W. Wong, C. Gonzalez, and J. A. Pople, Gaussian, Inc., Wallingford CT, 2004.

Calculations were performed with Gaussian 03 at DFT level. The geometries of the structures were optimized using the B3LYP hybrid functional. The 6-31G(d,p) basis set was used for all atoms. Harmonic frequencies were calculated at the same level to characterize the stationary points.

Calculated geometrical parameters of **1**, **2**, **5-10**, **1a-10a** and intermediates **A-C** (see below) can be found in the following Table

Table S1.

| Compound   | Length<br>(Å)        | Linearity<br>(°) | Torsion Angle<br>(°) |
|------------|----------------------|------------------|----------------------|
| <b>1</b>   | 13.66                | 178.6            | 45.0                 |
| <b>1a</b>  | 13.76                | 178.8            | 27.8                 |
| <b>3a</b>  | 13.70                | 178.8            | 29.3                 |
| <b>2</b>   | 18.74                | 179.8            | 0                    |
| <b>2a</b>  | 18.73                | 169.1            | 0.4                  |
| <b>4a</b>  | 18.82                | 179.6            | 14.3                 |
| <b>5</b>   | 15.04 <sup>[a]</sup> | 178.6            | 41.5                 |
| <b>5a</b>  | 15.16 <sup>[a]</sup> | 179.2            | 26.5                 |
| <b>6</b>   | 15.09 <sup>[a]</sup> | 179.6            | 40.6                 |
| <b>6a</b>  | 15.18 <sup>[a]</sup> | 178.1            | 26.7                 |
| <b>7</b>   | 16.66                | 179.1            | 40.1                 |
| <b>7a</b>  | 16.72                | 171.6            | 23.3                 |
| <b>8</b>   | 16.58                | 179.1            | 40.0                 |
| <b>8a</b>  | 16.64                | 171.0            | 23.3                 |
| <b>9</b>   | 18.75                | 177.5            | 5.8                  |
| <b>9a</b>  | 18.80                | 178.8            | 0.2                  |
| <b>10</b>  | 18.75                | 178.4            | 6.1                  |
| <b>10a</b> | 18.81                | 179.0            | 0.0                  |
| <b>A</b>   | 13.62                | 179.1            | 40.0                 |
| <b>B</b>   | 13.67                | 175.6            | 53.1, 15.7           |

C                    13.64                    170.8                    48.0, 24.5  
 -----  
 [a] Distances between terminal sulphur atoms.

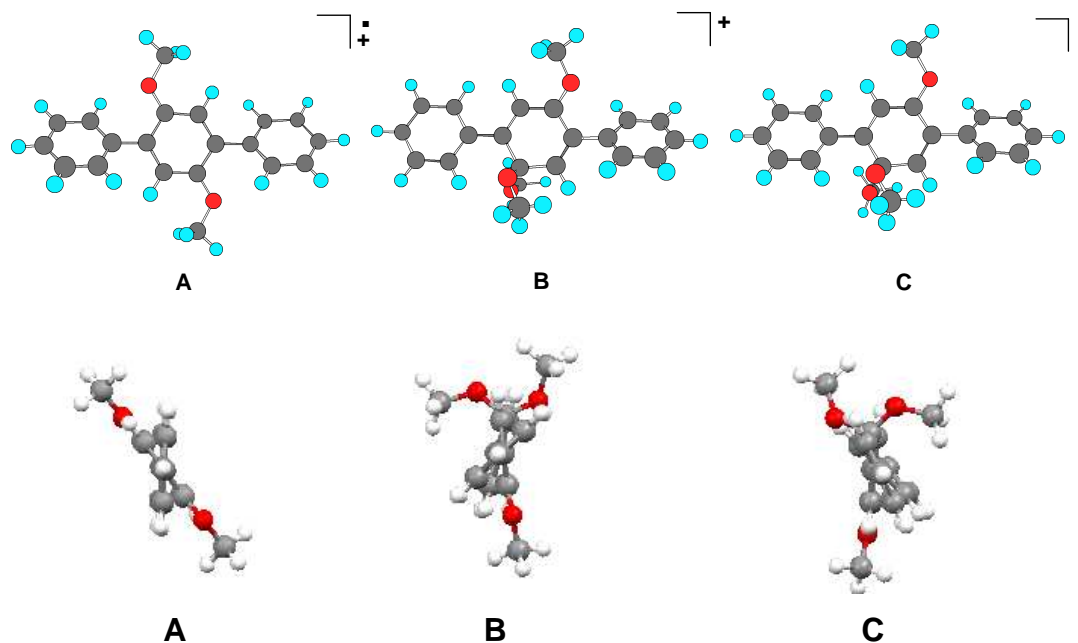

### Compound 1

```

Zero-point correction=                0.327825
(Hartree/Particle)
Thermal correction to Energy=         0.346730
Thermal correction to Enthalpy=       0.347674
Thermal correction to Gibbs Free Energy= 0.279703
Sum of electronic and zero-point Energies= -923.080987
Sum of electronic and thermal Energies= -923.062082
Sum of electronic and thermal Enthalpies= -923.061138
Sum of electronic and thermal Free Energies= -923.129109
    
```

| Center Number | Atomic Number | Atomic Type | Coordinates (Angstroms) |           |           |
|---------------|---------------|-------------|-------------------------|-----------|-----------|
|               |               |             | X                       | Y         | Z         |
| 1             | 6             | 0           | -4.935588               | -1.204397 | -0.826597 |
| 2             | 6             | 0           | -5.717470               | -0.418728 | 0.021153  |
| 3             | 6             | 0           | -5.098309               | 0.513329  | 0.856798  |
| 4             | 6             | 0           | -3.712351               | 0.659718  | 0.847818  |
| 5             | 6             | 0           | -2.910682               | -0.129142 | 0.004292  |
| 6             | 6             | 0           | -3.548400               | -1.060296 | -0.833773 |
| 7             | 6             | 0           | -1.426156               | -0.032871 | 0.013209  |
| 8             | 6             | 0           | -0.735156               | 1.197246  | 0.012863  |
| 9             | 6             | 0           | 0.661476                | 1.209319  | 0.011297  |
| 10            | 6             | 0           | 1.426153                | 0.032885  | 0.013208  |
| 11            | 6             | 0           | 0.735155                | -1.197227 | 0.012875  |
| 12            | 6             | 0           | -0.661479               | -1.209301 | 0.011303  |
| 13            | 6             | 0           | 2.910677                | 0.129148  | 0.004290  |
| 14            | 6             | 0           | 3.548406                | 1.060292  | -0.833780 |
| 15            | 6             | 0           | 4.935594                | 1.204376  | -0.826595 |

|    |   |   |           |           |           |
|----|---|---|-----------|-----------|-----------|
| 16 | 6 | 0 | 5.717462  | 0.418699  | 0.021164  |
| 17 | 6 | 0 | 5.098289  | -0.513354 | 0.856804  |
| 18 | 6 | 0 | 3.712330  | -0.659728 | 0.847814  |
| 19 | 8 | 0 | 1.496888  | -2.336982 | 0.004734  |
| 20 | 6 | 0 | 0.841253  | -3.589845 | -0.077094 |
| 21 | 8 | 0 | -1.496880 | 2.337004  | 0.004708  |
| 22 | 6 | 0 | -0.841223 | 3.589861  | -0.077076 |
| 23 | 1 | 0 | -5.404968 | -1.926142 | -1.489485 |
| 24 | 1 | 0 | -6.798222 | -0.528325 | 0.028154  |
| 25 | 1 | 0 | -5.697434 | 1.128415  | 1.522749  |
| 26 | 1 | 0 | -3.241882 | 1.385934  | 1.500124  |
| 27 | 1 | 0 | -2.949196 | -1.661101 | -1.511911 |
| 28 | 1 | 0 | 1.193368  | 2.152293  | 0.030557  |
| 29 | 1 | 0 | -1.193366 | -2.152278 | 0.030565  |
| 30 | 1 | 0 | 2.949205  | 1.661100  | -1.511918 |
| 31 | 1 | 0 | 5.404996  | 1.926104  | -1.489487 |
| 32 | 1 | 0 | 6.798215  | 0.528290  | 0.028168  |
| 33 | 1 | 0 | 5.697405  | -1.128446 | 1.522757  |
| 34 | 1 | 0 | 3.241833  | -1.385952 | 1.500092  |
| 35 | 1 | 0 | 1.632478  | -4.340812 | -0.110269 |
| 36 | 1 | 0 | 0.229952  | -3.670259 | -0.985591 |
| 37 | 1 | 0 | 0.204890  | -3.777561 | 0.797954  |
| 38 | 1 | 0 | -1.632438 | 4.340837  | -0.110279 |
| 39 | 1 | 0 | -0.229882 | 3.670269  | -0.985546 |
| 40 | 1 | 0 | -0.204895 | 3.777560  | 0.798002  |

## Compound 2

|                                              |              |
|----------------------------------------------|--------------|
| Zero-point correction=                       | 0.347585     |
| (Hartree/Particle)                           |              |
| Thermal correction to Energy=                | 0.370816     |
| Thermal correction to Enthalpy=              | 0.371760     |
| Thermal correction to Gibbs Free Energy=     | 0.290686     |
| Sum of electronic and zero-point Energies=   | -1075.374235 |
| Sum of electronic and thermal Energies=      | -1075.351004 |
| Sum of electronic and thermal Enthalpies=    | -1075.350060 |
| Sum of electronic and thermal Free Energies= | -1075.431134 |

| Center<br>Number | Atomic<br>Number | Atomic<br>Type | Coordinates (Angstroms) |           |           |
|------------------|------------------|----------------|-------------------------|-----------|-----------|
|                  |                  |                | X                       | Y         | Z         |
| 1                | 6                | 0              | 7.605996                | 1.021928  | -0.000124 |
| 2                | 6                | 0              | 8.281079                | -0.201757 | -0.000063 |
| 3                | 6                | 0              | 7.553513                | -1.394762 | 0.000000  |
| 4                | 6                | 0              | 6.161651                | -1.369559 | -0.000001 |
| 5                | 6                | 0              | 5.470175                | -0.140528 | -0.000056 |
| 6                | 6                | 0              | 6.214576                | 1.057626  | -0.000120 |
| 7                | 6                | 0              | 4.047276                | -0.104359 | -0.000056 |
| 8                | 6                | 0              | 2.831373                | -0.052441 | 0.000002  |
| 9                | 6                | 0              | 1.413144                | -0.018824 | 0.000044  |
| 10               | 6                | 0              | 0.716893                | 1.216020  | 0.000093  |
| 11               | 6                | 0              | -0.675187               | 1.219430  | 0.000101  |
| 12               | 6                | 0              | -1.413138               | 0.018891  | 0.000072  |
| 13               | 6                | 0              | -0.716890               | -1.215952 | 0.000058  |
| 14               | 6                | 0              | 0.675190                | -1.219363 | 0.000029  |
| 15               | 6                | 0              | -2.831369               | 0.052507  | 0.000048  |
| 16               | 6                | 0              | -4.047272               | 0.104422  | -0.000016 |
| 17               | 6                | 0              | -5.470174               | 0.140524  | -0.000039 |
| 18               | 6                | 0              | -6.161709               | 1.369521  | -0.000159 |
| 19               | 6                | 0              | -7.553574               | 1.394657  | -0.000177 |

|    |   |   |           |           |           |
|----|---|---|-----------|-----------|-----------|
| 20 | 6 | 0 | -8.281079 | 0.201617  | -0.000080 |
| 21 | 6 | 0 | -7.605936 | -1.022036 | 0.000036  |
| 22 | 6 | 0 | -6.214515 | -1.057668 | 0.000058  |
| 23 | 8 | 0 | -1.491006 | -2.337611 | 0.000062  |
| 24 | 6 | 0 | -0.844104 | -3.599432 | -0.000008 |
| 25 | 8 | 0 | 1.491001  | 2.337679  | 0.000124  |
| 26 | 6 | 0 | 0.844093  | 3.599488  | 0.000142  |
| 27 | 1 | 0 | 8.166864  | 1.952248  | -0.000174 |
| 28 | 1 | 0 | 9.366904  | -0.225497 | -0.000064 |
| 29 | 1 | 0 | 8.073304  | -2.348635 | 0.000045  |
| 30 | 1 | 0 | 5.594133  | -2.294702 | 0.000042  |
| 31 | 1 | 0 | 5.685521  | 2.005058  | -0.000164 |
| 32 | 1 | 0 | -1.228723 | 2.149438  | 0.000124  |
| 33 | 1 | 0 | 1.228730  | -2.149367 | -0.000030 |
| 34 | 1 | 0 | -5.594235 | 2.294691  | -0.000236 |
| 35 | 1 | 0 | -8.073409 | 2.348505  | -0.000269 |
| 36 | 1 | 0 | -9.366906 | 0.225298  | -0.000095 |
| 37 | 1 | 0 | -8.166762 | -1.952381 | 0.000113  |
| 38 | 1 | 0 | -5.685410 | -2.005072 | 0.000152  |
| 39 | 1 | 0 | -1.640877 | -4.344726 | 0.000026  |
| 40 | 1 | 0 | -0.221980 | -3.736496 | 0.894020  |
| 41 | 1 | 0 | -0.222091 | -3.736456 | -0.894119 |
| 42 | 1 | 0 | 1.640856  | 4.344792  | 0.000157  |
| 43 | 1 | 0 | 0.222013  | 3.736507  | 0.894210  |
| 44 | 1 | 0 | 0.222019  | 3.736549  | -0.893923 |

## Compound 5

|                                              |              |
|----------------------------------------------|--------------|
| Zero-point correction=                       | 0.338927     |
| (Hartree/Particle)                           |              |
| Thermal correction to Energy=                | 0.368656     |
| Thermal correction to Enthalpy=              | 0.369600     |
| Thermal correction to Gibbs Free Energy=     | 0.271844     |
| Sum of electronic and zero-point Energies=   | -2393.479128 |
| Sum of electronic and thermal Energies=      | -2393.449399 |
| Sum of electronic and thermal Enthalpies=    | -2393.448455 |
| Sum of electronic and thermal Free Energies= | -2393.546211 |

| Center<br>Number | Atomic<br>Number | Atomic<br>Type | Coordinates (Angstroms) |           |           |
|------------------|------------------|----------------|-------------------------|-----------|-----------|
|                  |                  |                | X                       | Y         | Z         |
| 1                | 6                | 0              | 5.661528                | 0.647425  | -0.569517 |
| 2                | 6                | 0              | 4.925018                | 1.444199  | 0.313548  |
| 3                | 6                | 0              | 3.554051                | 1.241725  | 0.452291  |
| 4                | 6                | 0              | 2.885612                | 0.245720  | -0.281264 |
| 5                | 6                | 0              | 3.642671                | -0.550832 | -1.158952 |
| 6                | 6                | 0              | 5.011959                | -0.350199 | -1.307214 |
| 7                | 6                | 0              | 1.413587                | 0.090401  | -0.148449 |
| 8                | 6                | 0              | 0.782023                | -1.168165 | -0.049231 |
| 9                | 6                | 0              | -0.605065               | -1.235946 | 0.097285  |
| 10               | 6                | 0              | -1.413594               | -0.090267 | 0.148277  |
| 11               | 6                | 0              | -0.782074               | 1.168295  | 0.048919  |
| 12               | 6                | 0              | 0.605007                | 1.236077  | -0.097575 |
| 13               | 6                | 0              | -2.885619               | -0.245576 | 0.281256  |
| 14               | 6                | 0              | -3.642324               | 0.549767  | 1.160327  |
| 15               | 6                | 0              | -5.011608               | 0.349098  | 1.308617  |
| 16               | 6                | 0              | -5.661476               | -0.647395 | 0.569659  |
| 17               | 6                | 0              | -4.925281               | -1.443033 | -0.314693 |
| 18               | 6                | 0              | -3.554327               | -1.240488 | -0.453518 |
| 19               | 8                | 0              | -1.591105               | 2.271440  | 0.075172  |



|    |    |   |           |           |           |
|----|----|---|-----------|-----------|-----------|
| 20 | 6  | 0 | -1.005984 | 3.551022  | -0.104551 |
| 21 | 8  | 0 | 1.590979  | -2.271371 | -0.075714 |
| 22 | 6  | 0 | 1.005871  | -3.550902 | 0.104471  |
| 23 | 16 | 0 | 7.416547  | 0.943222  | -0.794085 |
| 24 | 6  | 0 | 8.083341  | -0.257676 | 0.406504  |
| 25 | 9  | 0 | 9.423190  | -0.158181 | 0.374810  |
| 26 | 9  | 0 | 7.672270  | -0.020872 | 1.663867  |
| 27 | 9  | 0 | 7.749067  | -1.527236 | 0.115195  |
| 28 | 16 | 0 | -7.416482 | -0.943217 | 0.794322  |
| 29 | 6  | 0 | -8.083322 | 0.257515  | -0.406410 |
| 30 | 9  | 0 | -9.423172 | 0.158102  | -0.374576 |
| 31 | 9  | 0 | -7.748935 | 1.527090  | -0.115363 |
| 32 | 9  | 0 | -7.672393 | 0.020453  | -1.663783 |
| 33 | 1  | 0 | 5.426593  | 2.211579  | 0.893822  |
| 34 | 1  | 0 | 2.995723  | 1.849598  | 1.157647  |
| 35 | 1  | 0 | 3.150963  | -1.326818 | -1.732712 |
| 36 | 1  | 0 | 5.580973  | -0.963921 | -1.997581 |
| 37 | 1  | 0 | -1.088779 | -2.198403 | 0.206548  |
| 38 | 1  | 0 | 1.088663  | 2.198543  | -0.206973 |
| 39 | 1  | 0 | -3.150428 | 1.324764  | 1.735287  |
| 40 | 1  | 0 | -5.580380 | 0.961881  | 2.000018  |
| 41 | 1  | 0 | -5.427071 | -2.209596 | -0.895860 |
| 42 | 1  | 0 | -2.996174 | -1.847470 | -1.159784 |
| 43 | 1  | 0 | -1.831272 | 4.263864  | -0.072925 |
| 44 | 1  | 0 | -0.293544 | 3.789823  | 0.695837  |
| 45 | 1  | 0 | -0.497078 | 3.631302  | -1.073583 |
| 46 | 1  | 0 | 1.831146  | -4.263762 | 0.072886  |
| 47 | 1  | 0 | 0.497143  | -3.630899 | 1.073617  |
| 48 | 1  | 0 | 0.293287  | -3.789920 | -0.695723 |

## Compound 6

Zero-point correction= 0.391021  
 (Hartree/Particle)

Thermal correction to Energy= 0.419163  
 Thermal correction to Enthalpy= 0.420107  
 Thermal correction to Gibbs Free Energy= 0.329366  
 Sum of electronic and zero-point Energies= -1948.357255  
 Sum of electronic and thermal Energies= -1948.329113  
 Sum of electronic and thermal Enthalpies= -1948.328168  
 Sum of electronic and thermal Free Energies= -1948.418910

| Center<br>Number | Atomic<br>Number | Atomic<br>Type | Coordinates (Angstroms) |           |           |
|------------------|------------------|----------------|-------------------------|-----------|-----------|
|                  |                  |                | X                       | Y         | Z         |
| 1                | 6                | 0              | 5.718945                | -0.152562 | -0.170230 |
| 2                | 6                | 0              | 4.965170                | -0.911190 | -1.067003 |
| 3                | 6                | 0              | 3.575423                | -0.820347 | -1.036004 |
| 4                | 6                | 0              | 2.923155                | 0.035110  | -0.128147 |
| 5                | 6                | 0              | 3.709271                | 0.805890  | 0.747815  |
| 6                | 6                | 0              | 5.099903                | 0.715436  | 0.726132  |
| 7                | 6                | 0              | 1.438245                | 0.086379  | -0.095693 |
| 8                | 6                | 0              | 0.710307                | 1.285421  | 0.052077  |
| 9                | 6                | 0              | -0.682808               | 1.274420  | 0.068911  |
| 10               | 6                | 0              | -1.427754               | 0.090681  | -0.047738 |
| 11               | 6                | 0              | -0.699558               | -1.108328 | -0.193351 |
| 12               | 6                | 0              | 0.693354                | -1.097526 | -0.211246 |
| 13               | 6                | 0              | -2.912950               | 0.141110  | -0.023354 |
| 14               | 6                | 0              | -3.691541               | -0.624896 | -0.910073 |
| 15               | 6                | 0              | -5.081945               | -0.528726 | -0.905452 |
| 16               | 6                | 0              | -5.709493               | 0.326367  | -0.002656 |

|    |    |   |           |           |           |
|----|----|---|-----------|-----------|-----------|
| 17 | 6  | 0 | -4.961708 | 1.109092  | 0.878336  |
| 18 | 6  | 0 | -3.572477 | 1.006216  | 0.869991  |
| 19 | 8  | 0 | -1.338159 | -2.325296 | -0.334101 |
| 20 | 6  | 0 | -1.712822 | -2.945335 | 0.897510  |
| 21 | 8  | 0 | 1.348711  | 2.501505  | 0.194693  |
| 22 | 6  | 0 | 1.720631  | 3.126846  | -1.036207 |
| 23 | 16 | 0 | 7.541741  | -0.191126 | -0.207648 |
| 24 | 8  | 0 | 8.029350  | 0.875020  | 0.748377  |
| 25 | 6  | 0 | 7.728698  | -1.806639 | 0.650704  |
| 26 | 16 | 0 | -7.526544 | 0.464269  | -0.074815 |
| 27 | 8  | 0 | -7.991652 | -0.389885 | -1.233377 |
| 28 | 6  | 0 | -7.865238 | -0.488194 | 1.461542  |
| 29 | 1  | 0 | 5.450101  | -1.560280 | -1.792320 |
| 30 | 1  | 0 | 2.986338  | -1.398737 | -1.741446 |
| 31 | 1  | 0 | 3.223637  | 1.478993  | 1.444249  |
| 32 | 1  | 0 | 5.721775  | 1.309373  | 1.389853  |
| 33 | 1  | 0 | -1.192210 | 2.228840  | 0.154863  |
| 34 | 1  | 0 | 1.202986  | -2.051659 | -0.299502 |
| 35 | 1  | 0 | -3.199995 | -1.292267 | -1.607937 |
| 36 | 1  | 0 | -5.696295 | -1.095233 | -1.599434 |
| 37 | 1  | 0 | -5.450478 | 1.792073  | 1.569192  |
| 38 | 1  | 0 | -2.989052 | 1.596417  | 1.570335  |
| 39 | 1  | 0 | -2.189287 | -3.892338 | 0.636277  |
| 40 | 1  | 0 | -0.832430 | -3.140571 | 1.523296  |
| 41 | 1  | 0 | -2.422318 | -2.325759 | 1.459195  |
| 42 | 1  | 0 | 2.197579  | 4.072582  | -0.771906 |
| 43 | 1  | 0 | 2.429122  | 2.509696  | -1.601413 |
| 44 | 1  | 0 | 0.838341  | 3.324145  | -1.658416 |
| 45 | 1  | 0 | 8.800429  | -1.997642 | 0.739382  |
| 46 | 1  | 0 | 7.252772  | -2.594041 | 0.061227  |
| 47 | 1  | 0 | 7.275865  | -1.733806 | 1.641821  |
| 48 | 1  | 0 | -8.950422 | -0.526383 | 1.579223  |
| 49 | 1  | 0 | -7.463551 | -1.497129 | 1.345856  |
| 50 | 1  | 0 | -7.410902 | 0.017328  | 2.317096  |

### Compound 7

|                                              |              |
|----------------------------------------------|--------------|
| Zero-point correction=                       | 0.324953     |
| (Hartree/Particle)                           |              |
| Thermal correction to Energy=                | 0.345922     |
| Thermal correction to Enthalpy=              | 0.346866     |
| Thermal correction to Gibbs Free Energy=     | 0.274414     |
| Sum of electronic and zero-point Energies=   | -1107.553347 |
| Sum of electronic and thermal Energies=      | -1107.532379 |
| Sum of electronic and thermal Enthalpies=    | -1107.531434 |
| Sum of electronic and thermal Free Energies= | -1107.603886 |

| Center Number | Atomic Number | Atomic Type | Coordinates (Angstroms) |           |           |
|---------------|---------------|-------------|-------------------------|-----------|-----------|
|               |               |             | X                       | Y         | Z         |
| 1             | 6             | 0           | -5.031601               | -1.551386 | 0.000042  |
| 2             | 6             | 0           | -4.994739               | -2.952456 | -0.000010 |
| 3             | 6             | 0           | -3.744142               | -3.589832 | -0.000058 |
| 4             | 6             | 0           | -2.577498               | -2.839850 | -0.000053 |
| 5             | 6             | 0           | -2.583300               | -1.425364 | -0.000002 |
| 6             | 6             | 0           | -3.855596               | -0.809872 | 0.000046  |
| 7             | 6             | 0           | -1.299726               | -0.660778 | 0.000001  |
| 8             | 6             | 0           | -1.180412               | 0.754496  | 0.000032  |
| 9             | 6             | 0           | 0.077324                | 1.355560  | 0.000031  |
| 10            | 6             | 0           | 1.299726                | 0.660778  | -0.000001 |
| 11            | 6             | 0           | 1.180412                | -0.754496 | -0.000032 |

|    |   |   |           |           |           |
|----|---|---|-----------|-----------|-----------|
| 12 | 6 | 0 | -0.077324 | -1.355560 | -0.000031 |
| 13 | 6 | 0 | 2.583300  | 1.425364  | 0.000002  |
| 14 | 6 | 0 | 3.855596  | 0.809872  | -0.000046 |
| 15 | 6 | 0 | 5.031601  | 1.551386  | -0.000042 |
| 16 | 6 | 0 | 4.994739  | 2.952456  | 0.000010  |
| 17 | 6 | 0 | 3.744142  | 3.589832  | 0.000058  |
| 18 | 6 | 0 | 2.577498  | 2.839850  | 0.000053  |
| 19 | 8 | 0 | 2.322888  | -1.507850 | -0.000064 |
| 20 | 6 | 0 | 2.236809  | -2.924713 | -0.000042 |
| 21 | 8 | 0 | -2.322888 | 1.507850  | 0.000064  |
| 22 | 6 | 0 | -2.236809 | 2.924713  | 0.000042  |
| 23 | 6 | 0 | -6.204868 | -3.718546 | -0.000015 |
| 24 | 7 | 0 | -7.187643 | -4.341810 | -0.000019 |
| 25 | 6 | 0 | 6.204868  | 3.718546  | 0.000015  |
| 26 | 7 | 0 | 7.187643  | 4.341810  | 0.000019  |
| 27 | 1 | 0 | -5.988757 | -1.040290 | 0.000080  |
| 28 | 1 | 0 | -3.691865 | -4.673482 | -0.000099 |
| 29 | 1 | 0 | -1.647098 | -3.392478 | -0.000093 |
| 30 | 1 | 0 | -3.927684 | 0.264734  | 0.000088  |
| 31 | 1 | 0 | 0.102122  | 2.432630  | 0.000057  |
| 32 | 1 | 0 | -0.102122 | -2.432630 | -0.000057 |
| 33 | 1 | 0 | 3.927684  | -0.264734 | -0.000088 |
| 34 | 1 | 0 | 5.988757  | 1.040290  | -0.000080 |
| 35 | 1 | 0 | 3.691865  | 4.673482  | 0.000099  |
| 36 | 1 | 0 | 1.647098  | 3.392478  | 0.000093  |
| 37 | 1 | 0 | 3.267185  | -3.283045 | -0.000040 |
| 38 | 1 | 0 | 1.726145  | -3.300230 | -0.895540 |
| 39 | 1 | 0 | 1.726146  | -3.300203 | 0.895467  |
| 40 | 1 | 0 | -3.267185 | 3.283045  | 0.000040  |
| 41 | 1 | 0 | -1.726145 | 3.300230  | 0.895540  |
| 42 | 1 | 0 | -1.726146 | 3.300203  | -0.895467 |

## Compound 8

|                                              |              |
|----------------------------------------------|--------------|
| Zero-point correction=                       | 0.322473     |
| (Hartree/Particle)                           |              |
| Thermal correction to Energy=                | 0.345725     |
| Thermal correction to Enthalpy=              | 0.346669     |
| Thermal correction to Gibbs Free Energy=     | 0.268060     |
| Sum of electronic and zero-point Energies=   | -1107.492021 |
| Sum of electronic and thermal Energies=      | -1107.468769 |
| Sum of electronic and thermal Enthalpies=    | -1107.467825 |
| Sum of electronic and thermal Free Energies= | -1107.546434 |

| Center Number | Atomic Number | Atomic Type | Coordinates (Angstroms) |           |           |
|---------------|---------------|-------------|-------------------------|-----------|-----------|
|               |               |             | X                       | Y         | Z         |
| 1             | 6             | 0           | -5.072910               | 0.638643  | 0.897212  |
| 2             | 6             | 0           | -5.722356               | -0.272026 | 0.053060  |
| 3             | 6             | 0           | -4.976741               | -1.081589 | -0.812911 |
| 4             | 6             | 0           | -3.590219               | -0.975872 | -0.825345 |
| 5             | 6             | 0           | -2.916483               | -0.071323 | 0.015185  |
| 6             | 6             | 0           | -3.686306               | 0.735762  | 0.873573  |
| 7             | 6             | 0           | -1.432572               | -0.012103 | 0.009618  |
| 8             | 6             | 0           | -0.710047               | 1.196717  | 0.090977  |
| 9             | 6             | 0           | 0.682846                | 1.195680  | 0.075887  |
| 10            | 6             | 0           | 1.432544                | 0.012107  | -0.009539 |
| 11            | 6             | 0           | 0.710022                | -1.196712 | -0.090892 |
| 12            | 6             | 0           | -0.682872               | -1.195676 | -0.075806 |
| 13            | 6             | 0           | 2.916454                | 0.071323  | -0.015149 |

|    |   |   |           |           |           |
|----|---|---|-----------|-----------|-----------|
| 14 | 6 | 0 | 3.686236  | -0.735799 | -0.873538 |
| 15 | 6 | 0 | 5.072840  | -0.638698 | -0.897231 |
| 16 | 6 | 0 | 5.722326  | 0.271991  | -0.053131 |
| 17 | 6 | 0 | 4.976752  | 1.081585  | 0.812847  |
| 18 | 6 | 0 | 3.590229  | 0.975883  | 0.825337  |
| 19 | 8 | 0 | 1.357643  | -2.411492 | -0.197985 |
| 20 | 6 | 0 | 1.719496  | -3.004796 | 1.051870  |
| 21 | 8 | 0 | -1.357682 | 2.411491  | 0.198053  |
| 22 | 6 | 0 | -1.719252 | 3.004923  | -1.051821 |
| 23 | 7 | 0 | -7.103022 | -0.369070 | 0.072122  |
| 24 | 6 | 0 | -8.281547 | -0.451540 | 0.088295  |
| 25 | 7 | 0 | 7.102992  | 0.369020  | -0.072248 |
| 26 | 6 | 0 | 8.281514  | 0.451518  | -0.088471 |
| 27 | 1 | 0 | -5.661807 | 1.256288  | 1.566719  |
| 28 | 1 | 0 | -5.489575 | -1.776400 | -1.469094 |
| 29 | 1 | 0 | -3.019968 | -1.593291 | -1.512349 |
| 30 | 1 | 0 | -3.189847 | 1.443137  | 1.526282  |
| 31 | 1 | 0 | 1.187617  | 2.155734  | 0.112814  |
| 32 | 1 | 0 | -1.187634 | -2.155733 | -0.112734 |
| 33 | 1 | 0 | 3.189742  | -1.443195 | -1.526201 |
| 34 | 1 | 0 | 5.661705  | -1.256371 | -1.566738 |
| 35 | 1 | 0 | 5.489619  | 1.776407  | 1.468993  |
| 36 | 1 | 0 | 3.020010  | 1.593325  | 1.512346  |
| 37 | 1 | 0 | 2.201192  | -3.955656 | 0.816207  |
| 38 | 1 | 0 | 0.832454  | -3.188950 | 1.671089  |
| 39 | 1 | 0 | 2.420580  | -2.370654 | 1.607829  |
| 40 | 1 | 0 | -2.200931 | 3.955796  | -0.816177 |
| 41 | 1 | 0 | -0.832083 | 3.189068  | -1.670860 |
| 42 | 1 | 0 | -2.420271 | 2.370868  | -1.607964 |

### Compound 1a

Zero-point correction= 0.414466  
 (Hartree/Particle)

Thermal correction to Energy= 0.439170  
 Thermal correction to Enthalpy= 0.440114  
 Thermal correction to Gibbs Free Energy= 0.360654  
 Sum of electronic and zero-point Energies= -1153.196494  
 Sum of electronic and thermal Energies= -1153.171790  
 Sum of electronic and thermal Enthalpies= -1153.170846  
 Sum of electronic and thermal Free Energies= -1153.250307

| Center<br>Number | Atomic<br>Number | Atomic<br>Type | Coordinates (Angstroms) |           |           |
|------------------|------------------|----------------|-------------------------|-----------|-----------|
|                  |                  |                | X                       | Y         | Z         |
| 1                | 6                | 0              | -4.961533               | -1.593295 | 0.093744  |
| 2                | 6                | 0              | -5.769849               | -0.460772 | 0.211889  |
| 3                | 6                | 0              | -5.174724               | 0.799556  | 0.273347  |
| 4                | 6                | 0              | -3.787134               | 0.934181  | 0.230450  |
| 5                | 6                | 0              | -2.957697               | -0.199551 | 0.134716  |
| 6                | 6                | 0              | -3.575861               | -1.462523 | 0.047795  |
| 7                | 6                | 0              | -1.472150               | -0.094900 | 0.109403  |
| 8                | 6                | 0              | -0.820424               | 1.189550  | -0.406903 |
| 9                | 6                | 0              | 0.682527                | 1.097157  | -0.535040 |
| 10               | 6                | 0              | 1.471800                | 0.095343  | -0.108789 |
| 11               | 6                | 0              | 0.819956                | -1.189060 | 0.407800  |
| 12               | 6                | 0              | -0.683015               | -1.096758 | 0.535719  |
| 13               | 6                | 0              | 2.957390                | 0.199462  | -0.134838 |
| 14               | 6                | 0              | 3.576307                | 1.462482  | -0.053556 |
| 15               | 6                | 0              | 4.962008                | 1.592357  | -0.100354 |
| 16               | 6                | 0              | 5.769802                | 0.458953  | -0.213680 |

|    |   |   |           |           |           |
|----|---|---|-----------|-----------|-----------|
| 17 | 6 | 0 | 5.174021  | -0.801296 | -0.269564 |
| 18 | 6 | 0 | 3.786357  | -0.935038 | -0.225892 |
| 19 | 8 | 0 | 1.117008  | -2.315626 | -0.427239 |
| 20 | 6 | 0 | 0.797115  | -2.213127 | -1.805582 |
| 21 | 8 | 0 | -1.117819 | 2.315802  | 0.428483  |
| 22 | 6 | 0 | -0.793459 | 2.214681  | 1.805875  |
| 23 | 8 | 0 | 1.396780  | -1.639241 | 1.621649  |
| 24 | 6 | 0 | 1.311685  | -0.760314 | 2.730287  |
| 25 | 8 | 0 | -1.397303 | 1.640046  | -1.620583 |
| 26 | 6 | 0 | -1.312895 | 0.761128  | -2.729288 |
| 27 | 1 | 0 | -5.410142 | -2.580258 | 0.023044  |
| 28 | 1 | 0 | -6.851148 | -0.560092 | 0.242695  |
| 29 | 1 | 0 | -5.793230 | 1.689209  | 0.353377  |
| 30 | 1 | 0 | -3.337133 | 1.917710  | 0.267751  |
| 31 | 1 | 0 | -2.965800 | -2.351322 | -0.079509 |
| 32 | 1 | 0 | 1.109164  | 2.001209  | -0.961827 |
| 33 | 1 | 0 | -1.109927 | -2.000939 | 0.961991  |
| 34 | 1 | 0 | 2.966979  | 2.352261  | 0.070260  |
| 35 | 1 | 0 | 5.411076  | 2.579420  | -0.034118 |
| 36 | 1 | 0 | 6.851141  | 0.557628  | -0.245092 |
| 37 | 1 | 0 | 5.792023  | -1.691626 | -0.345871 |
| 38 | 1 | 0 | 3.335992  | -1.918516 | -0.259460 |
| 39 | 1 | 0 | 1.014278  | -3.194665 | -2.232620 |
| 40 | 1 | 0 | 1.408929  | -1.459577 | -2.317828 |
| 41 | 1 | 0 | -0.262107 | -1.981494 | -1.968291 |
| 42 | 1 | 0 | -1.012894 | 3.195481  | 2.233441  |
| 43 | 1 | 0 | 0.267059  | 1.986824  | 1.965408  |
| 44 | 1 | 0 | -1.400997 | 1.458980  | 2.320054  |
| 45 | 1 | 0 | 1.744299  | -1.301420 | 3.574459  |
| 46 | 1 | 0 | 0.273634  | -0.497154 | 2.971874  |
| 47 | 1 | 0 | 1.886828  | 0.161384  | 2.571724  |
| 48 | 1 | 0 | -1.742328 | 1.303756  | -3.574112 |
| 49 | 1 | 0 | -1.891156 | -0.158839 | -2.571972 |
| 50 | 1 | 0 | -0.275225 | 0.494905  | -2.969099 |

### Compound 2a

|                                              |              |
|----------------------------------------------|--------------|
| Zero-point correction=                       | 0.433399     |
| (Hartree/Particle)                           |              |
| Thermal correction to Energy=                | 0.462903     |
| Thermal correction to Enthalpy=              | 0.463847     |
| Thermal correction to Gibbs Free Energy=     | 0.368647     |
| Sum of electronic and zero-point Energies=   | -1305.487752 |
| Sum of electronic and thermal Energies=      | -1305.458248 |
| Sum of electronic and thermal Enthalpies=    | -1305.457304 |
| Sum of electronic and thermal Free Energies= | -1305.552504 |

| Center<br>Number | Atomic<br>Number | Atomic<br>Type | Coordinates (Angstroms) |           |           |
|------------------|------------------|----------------|-------------------------|-----------|-----------|
|                  |                  |                | X                       | Y         | Z         |
| 1                | 6                | 0              | -7.564930               | -0.868596 | -0.480189 |
| 2                | 6                | 0              | -8.203035               | 0.372722  | -0.548684 |
| 3                | 6                | 0              | -7.452018               | 1.546638  | -0.446492 |
| 4                | 6                | 0              | -6.071671               | 1.484930  | -0.276772 |
| 5                | 6                | 0              | -5.418111               | 0.237737  | -0.205705 |
| 6                | 6                | 0              | -6.185177               | -0.940783 | -0.310106 |
| 7                | 6                | 0              | -4.005770               | 0.167915  | -0.031580 |
| 8                | 6                | 0              | -2.800234               | 0.102936  | 0.124214  |
| 9                | 6                | 0              | -1.385743               | 0.035893  | 0.265027  |
| 10               | 6                | 0              | -0.731517               | -1.346702 | 0.432325  |

|    |   |   |           |           |           |
|----|---|---|-----------|-----------|-----------|
| 11 | 6 | 0 | 0.769254  | -1.294562 | 0.277126  |
| 12 | 6 | 0 | 1.511278  | -0.175377 | 0.219793  |
| 13 | 6 | 0 | 0.868802  | 1.210684  | 0.301410  |
| 14 | 6 | 0 | -0.639648 | 1.157581  | 0.225651  |
| 15 | 6 | 0 | 2.927818  | -0.214797 | 0.109366  |
| 16 | 6 | 0 | 4.138003  | -0.240984 | -0.007467 |
| 17 | 6 | 0 | 5.556146  | -0.263189 | -0.138672 |
| 18 | 6 | 0 | 6.284241  | 0.942063  | -0.211180 |
| 19 | 6 | 0 | 7.670083  | 0.919122  | -0.340978 |
| 20 | 6 | 0 | 8.353115  | -0.298594 | -0.400562 |
| 21 | 6 | 0 | 7.640788  | -1.498583 | -0.329241 |
| 22 | 6 | 0 | 6.254686  | -1.486134 | -0.199412 |
| 23 | 8 | 0 | 1.361089  | 2.079232  | -0.719292 |
| 24 | 6 | 0 | 1.127273  | 1.681129  | -2.062126 |
| 25 | 8 | 0 | -1.288257 | -2.290175 | -0.479136 |
| 26 | 6 | 0 | -1.170803 | -1.984773 | -1.861357 |
| 27 | 8 | 0 | 1.322912  | 1.746996  | 1.520402  |
| 28 | 6 | 0 | 0.901980  | 3.071213  | 1.840614  |
| 29 | 8 | 0 | -0.916506 | -1.880571 | 1.720639  |
| 30 | 6 | 0 | -2.238953 | -2.238061 | 2.126577  |
| 31 | 1 | 0 | -8.144876 | -1.783532 | -0.559352 |
| 32 | 1 | 0 | -9.279717 | 0.424987  | -0.680957 |
| 33 | 1 | 0 | -7.944086 | 2.513500  | -0.499235 |
| 34 | 1 | 0 | -5.484943 | 2.394388  | -0.196669 |
| 35 | 1 | 0 | -5.685233 | -1.902524 | -0.256992 |
| 36 | 1 | 0 | 1.241044  | -2.272344 | 0.264554  |
| 37 | 1 | 0 | -1.130615 | 2.120046  | 0.111924  |
| 38 | 1 | 0 | 5.748080  | 1.884262  | -0.162994 |
| 39 | 1 | 0 | 8.219974  | 1.854334  | -0.395208 |
| 40 | 1 | 0 | 9.434463  | -0.312339 | -0.501391 |
| 41 | 1 | 0 | 8.167635  | -2.447437 | -0.374277 |
| 42 | 1 | 0 | 5.697848  | -2.415918 | -0.142291 |
| 43 | 1 | 0 | 1.517469  | 2.485465  | -2.689642 |
| 44 | 1 | 0 | 0.058474  | 1.549439  | -2.277454 |
| 45 | 1 | 0 | 1.655823  | 0.751781  | -2.309422 |
| 46 | 1 | 0 | -1.576780 | -2.845478 | -2.397377 |
| 47 | 1 | 0 | -0.124257 | -1.840954 | -2.160886 |
| 48 | 1 | 0 | -1.746319 | -1.092523 | -2.137892 |
| 49 | 1 | 0 | 1.501073  | 3.370326  | 2.703032  |
| 50 | 1 | 0 | -0.158627 | 3.107159  | 2.121785  |
| 51 | 1 | 0 | 1.086192  | 3.762973  | 1.013340  |
| 52 | 1 | 0 | -2.111443 | -2.832838 | 3.033990  |
| 53 | 1 | 0 | -2.744627 | -2.837077 | 1.364857  |
| 54 | 1 | 0 | -2.845594 | -1.356111 | 2.358172  |

### Compound 3a

|                                              |              |
|----------------------------------------------|--------------|
| Zero-point correction=                       | 0.373219     |
| (Hartree/Particle)                           |              |
| Thermal correction to Energy=                | 0.394278     |
| Thermal correction to Enthalpy=              | 0.395222     |
| Thermal correction to Gibbs Free Energy=     | 0.321608     |
| Sum of electronic and zero-point Energies=   | -1150.840054 |
| Sum of electronic and thermal Energies=      | -1150.818995 |
| Sum of electronic and thermal Enthalpies=    | -1150.818051 |
| Sum of electronic and thermal Free Energies= | -1150.891666 |

| Center<br>Number | Atomic<br>Number | Atomic<br>Type | Coordinates (Angstroms) |   |   |
|------------------|------------------|----------------|-------------------------|---|---|
|                  |                  |                | X                       | Y | Z |

|    |   |   |           |           |           |
|----|---|---|-----------|-----------|-----------|
| 1  | 6 | 0 | -4.829551 | 1.660132  | -0.850960 |
| 2  | 6 | 0 | -5.667782 | 1.056877  | 0.087826  |
| 3  | 6 | 0 | -5.128366 | 0.174855  | 1.026634  |
| 4  | 6 | 0 | -3.761805 | -0.107074 | 1.028151  |
| 5  | 6 | 0 | -2.908012 | 0.495836  | 0.087986  |
| 6  | 6 | 0 | -3.462474 | 1.382026  | -0.849871 |
| 7  | 6 | 0 | -1.436936 | 0.253372  | 0.085595  |
| 8  | 6 | 0 | -0.926198 | -1.161045 | -0.131080 |
| 9  | 6 | 0 | 0.573846  | -1.269685 | -0.188978 |
| 10 | 6 | 0 | 1.437106  | -0.253371 | -0.085651 |
| 11 | 6 | 0 | 0.926362  | 1.161057  | 0.131016  |
| 12 | 6 | 0 | -0.573694 | 1.269698  | 0.188892  |
| 13 | 6 | 0 | 2.908169  | -0.495914 | -0.088018 |
| 14 | 6 | 0 | 3.462379  | -1.382857 | 0.849285  |
| 15 | 6 | 0 | 4.829417  | -1.661123 | 0.850419  |
| 16 | 6 | 0 | 5.667886  | -1.057251 | -0.087757 |
| 17 | 6 | 0 | 5.128735  | -0.174461 | -1.025993 |
| 18 | 6 | 0 | 3.762209  | 0.107622  | -1.027557 |
| 19 | 8 | 0 | 1.448863  | 1.690035  | 1.360562  |
| 20 | 6 | 0 | 2.382927  | 2.723687  | 1.056008  |
| 21 | 8 | 0 | -1.448660 | -1.690084 | -1.360608 |
| 22 | 6 | 0 | -2.383523 | -2.722979 | -1.055912 |
| 23 | 8 | 0 | 1.420932  | 2.014879  | -0.913444 |
| 24 | 6 | 0 | 1.907781  | 3.211737  | -0.308298 |
| 25 | 8 | 0 | -1.420764 | -2.014852 | 0.913423  |
| 26 | 6 | 0 | -1.908490 | -3.211378 | 0.308287  |
| 27 | 1 | 0 | -5.239404 | 2.344669  | -1.588499 |
| 28 | 1 | 0 | -6.732539 | 1.272618  | 0.088880  |
| 29 | 1 | 0 | -5.772666 | -0.290808 | 1.767529  |
| 30 | 1 | 0 | -3.341899 | -0.782112 | 1.764612  |
| 31 | 1 | 0 | -2.812195 | 1.840574  | -1.588828 |
| 32 | 1 | 0 | 0.940745  | -2.283156 | -0.330499 |
| 33 | 1 | 0 | -0.940621 | 2.283166  | 0.330370  |
| 34 | 1 | 0 | 2.811925  | -1.841842 | 1.587816  |
| 35 | 1 | 0 | 5.239060  | -2.346246 | 1.587531  |
| 36 | 1 | 0 | 6.732621  | -1.273092 | -0.088774 |
| 37 | 1 | 0 | 5.773227  | 0.291688  | -1.766417 |
| 38 | 1 | 0 | 3.342508  | 0.783215  | -1.763620 |
| 39 | 1 | 0 | 3.404535  | 2.325877  | 1.006225  |
| 40 | 1 | 0 | 2.325295  | 3.483422  | 1.840984  |
| 41 | 1 | 0 | -2.326620 | -3.482719 | -1.840932 |
| 42 | 1 | 0 | -3.404802 | -2.324365 | -1.005911 |
| 43 | 1 | 0 | 2.703298  | 3.615170  | -0.940516 |
| 44 | 1 | 0 | 1.107453  | 3.959884  | -0.215275 |
| 45 | 1 | 0 | -2.704168 | -3.614338 | 0.940608  |
| 46 | 1 | 0 | -1.108634 | -3.960010 | 0.215109  |

### Compound 4a

|                                              |              |
|----------------------------------------------|--------------|
| Zero-point correction=                       | 0.392730     |
| (Hartree/Particle)                           |              |
| Thermal correction to Energy=                | 0.418227     |
| Thermal correction to Enthalpy=              | 0.419171     |
| Thermal correction to Gibbs Free Energy=     | 0.330494     |
| Sum of electronic and zero-point Energies=   | -1303.130166 |
| Sum of electronic and thermal Energies=      | -1303.104669 |
| Sum of electronic and thermal Enthalpies=    | -1303.103725 |
| Sum of electronic and thermal Free Energies= | -1303.192402 |

| Center | Atomic | Atomic | Coordinates (Angstroms) |
|--------|--------|--------|-------------------------|
|--------|--------|--------|-------------------------|

| Number | Number | Type | X         | Y         | Z         |
|--------|--------|------|-----------|-----------|-----------|
| 1      | 6      | 0    | -7.691625 | -0.684841 | -0.267412 |
| 2      | 6      | 0    | -8.307650 | 0.547197  | -0.033353 |
| 3      | 6      | 0    | -7.525021 | 1.679740  | 0.205866  |
| 4      | 6      | 0    | -6.136139 | 1.585760  | 0.212562  |
| 5      | 6      | 0    | -5.504071 | 0.347477  | -0.021725 |
| 6      | 6      | 0    | -6.303313 | -0.788352 | -0.262742 |
| 7      | 6      | 0    | -4.082149 | 0.250907  | -0.015347 |
| 8      | 6      | 0    | -2.867143 | 0.189079  | -0.009586 |
| 9      | 6      | 0    | -1.445889 | 0.126082  | -0.009583 |
| 10     | 6      | 0    | -0.813293 | -1.258399 | 0.058970  |
| 11     | 6      | 0    | 0.689313  | -1.236310 | 0.056411  |
| 12     | 6      | 0    | 1.445941  | -0.125902 | 0.009868  |
| 13     | 6      | 0    | 0.813346  | 1.258584  | -0.058432 |
| 14     | 6      | 0    | -0.689262 | 1.236490  | -0.056066 |
| 15     | 6      | 0    | 2.867189  | -0.188922 | 0.009675  |
| 16     | 6      | 0    | 4.082196  | -0.250797 | 0.014948  |
| 17     | 6      | 0    | 5.504101  | -0.347581 | 0.021064  |
| 18     | 6      | 0    | 6.303640  | 0.788771  | 0.258600  |
| 19     | 6      | 0    | 7.691935  | 0.685033  | 0.263021  |
| 20     | 6      | 0    | 8.307655  | -0.547762 | 0.032160  |
| 21     | 6      | 0    | 7.524733  | -1.680828 | -0.203599 |
| 22     | 6      | 0    | 6.135866  | -1.586625 | -0.210023 |
| 23     | 8      | 0    | 1.232519  | 1.944691  | -1.244374 |
| 24     | 6      | 0    | 2.143930  | 2.977894  | -0.870020 |
| 25     | 8      | 0    | -1.291537 | -2.030157 | -1.047404 |
| 26     | 6      | 0    | -1.708132 | -3.301245 | -0.553804 |
| 27     | 8      | 0    | 1.291477  | 2.030026  | 1.048240  |
| 28     | 6      | 0    | 1.707821  | 3.301371  | 0.555042  |
| 29     | 8      | 0    | -1.232332 | -1.944167 | 1.245179  |
| 30     | 6      | 0    | -2.143991 | -2.977295 | 0.871230  |
| 31     | 1      | 0    | -8.295514 | -1.567970 | -0.455252 |
| 32     | 1      | 0    | -9.390940 | 0.624335  | -0.037842 |
| 33     | 1      | 0    | -7.999013 | 2.639893  | 0.388262  |
| 34     | 1      | 0    | -5.525090 | 2.462966  | 0.398964  |
| 35     | 1      | 0    | -5.822483 | -1.743425 | -0.448705 |
| 36     | 1      | 0    | 1.156714  | -2.215293 | 0.099089  |
| 37     | 1      | 0    | -1.156672 | 2.215464  | -0.098860 |
| 38     | 1      | 0    | 5.823063  | 1.744455  | 0.442062  |
| 39     | 1      | 0    | 8.296050  | 1.568579  | 0.448151  |
| 40     | 1      | 0    | 9.390933  | -0.625077 | 0.036442  |
| 41     | 1      | 0    | 7.998485  | -2.641570 | -0.383500 |
| 42     | 1      | 0    | 5.524591  | -2.464240 | -0.393738 |
| 43     | 1      | 0    | 3.177826  | 2.612594  | -0.902060 |
| 44     | 1      | 0    | 2.025945  | 3.809233  | -1.570658 |
| 45     | 1      | 0    | -2.513357 | -3.668593 | -1.195585 |
| 46     | 1      | 0    | -0.878627 | -4.023136 | -0.568442 |
| 47     | 1      | 0    | 2.512866  | 3.668719  | 1.197043  |
| 48     | 1      | 0    | 0.878135  | 4.023049  | 0.569765  |
| 49     | 1      | 0    | -2.026057 | -3.808479 | 1.572059  |
| 50     | 1      | 0    | -3.177816 | -2.611802 | 0.903320  |

### Compound 5a

|                                          |          |
|------------------------------------------|----------|
| Zero-point correction=                   | 0.425563 |
| (Hartree/Particle)                       |          |
| Thermal correction to Energy=            | 0.460184 |
| Thermal correction to Enthalpy=          | 0.461129 |
| Thermal correction to Gibbs Free Energy= | 0.355886 |



Sum of electronic and zero-point Energies= -2623.593288  
 Sum of electronic and thermal Energies= -2623.558667  
 Sum of electronic and thermal Enthalpies= -2623.557723  
 Sum of electronic and thermal Free Energies= -2623.662966

| Center<br>Number | Atomic<br>Number | Atomic<br>Type | Coordinates (Angstroms) |           |           |
|------------------|------------------|----------------|-------------------------|-----------|-----------|
|                  |                  |                | X                       | Y         | Z         |
| 1                | 6                | 0              | 4.997483                | -1.108407 | -0.852249 |
| 2                | 6                | 0              | 5.727205                | 0.086835  | -0.867604 |
| 3                | 6                | 0              | 5.062244                | 1.302567  | -0.681263 |
| 4                | 6                | 0              | 3.682331                | 1.329226  | -0.487733 |
| 5                | 6                | 0              | 2.931596                | 0.138842  | -0.479995 |
| 6                | 6                | 0              | 3.622514                | -1.077692 | -0.645789 |
| 7                | 6                | 0              | 1.455147                | 0.136270  | -0.285993 |
| 8                | 6                | 0              | 0.805131                | 1.284822  | 0.488691  |
| 9                | 6                | 0              | -0.666764               | 1.074041  | 0.761054  |
| 10               | 6                | 0              | -1.444578               | 0.091811  | 0.273466  |
| 11               | 6                | 0              | -0.794574               | -1.055594 | -0.503185 |
| 12               | 6                | 0              | 0.677708                | -0.845956 | -0.773792 |
| 13               | 6                | 0              | -2.920095               | 0.084474  | 0.474248  |
| 14               | 6                | 0              | -3.612657               | 1.295456  | 0.665502  |
| 15               | 6                | 0              | -4.988723               | 1.318594  | 0.871238  |
| 16               | 6                | 0              | -5.713507               | 0.121366  | 0.883569  |
| 17               | 6                | 0              | -5.044749               | -1.091059 | 0.681849  |
| 18               | 6                | 0              | -3.668927               | -1.108284 | 0.466239  |
| 19               | 8                | 0              | -0.937184               | -2.308988 | 0.174208  |
| 20               | 6                | 0              | -0.457552               | -2.398334 | 1.507759  |
| 21               | 8                | 0              | 0.947670                | 2.537741  | -0.189855 |
| 22               | 6                | 0              | 0.464201                | 2.627395  | -1.522012 |
| 23               | 8                | 0              | -1.486843               | -1.354032 | -1.701481 |
| 24               | 6                | 0              | -1.557959               | -0.321838 | -2.672202 |
| 25               | 8                | 0              | 1.497998                | 1.584179  | 1.686301  |
| 26               | 6                | 0              | 1.569174                | 0.552264  | 2.657336  |
| 27               | 1                | 0              | 5.508373                | -2.055916 | -0.984144 |
| 28               | 16               | 0              | 7.495879                | 0.072793  | -1.173432 |
| 29               | 1                | 0              | 5.626214                | 2.229560  | -0.683175 |
| 30               | 1                | 0              | 3.179913                | 2.274774  | -0.331483 |
| 31               | 1                | 0              | 3.080654                | -2.016577 | -0.597019 |
| 32               | 1                | 0              | -1.086297               | 1.874839  | 1.364699  |
| 33               | 1                | 0              | 1.098458                | -1.648796 | -1.373916 |
| 34               | 1                | 0              | -3.075127               | 2.237214  | 0.625055  |
| 35               | 1                | 0              | -5.504526               | 2.263576  | 1.005858  |
| 36               | 16               | 0              | -7.476800               | 0.156438  | 1.213730  |
| 37               | 1                | 0              | -5.602571               | -2.021066 | 0.688758  |
| 38               | 1                | 0              | -3.164538               | -2.050143 | 0.295106  |
| 39               | 1                | 0              | -0.596090               | -3.441044 | 1.800477  |
| 40               | 1                | 0              | -1.023493               | -1.757560 | 2.195804  |
| 41               | 1                | 0              | 0.607054                | -2.146944 | 1.582747  |
| 42               | 1                | 0              | 0.603504                | 3.669790  | -1.815536 |
| 43               | 1                | 0              | -0.600966               | 2.377677  | -1.593756 |
| 44               | 1                | 0              | 1.027081                | 1.985436  | -2.211481 |
| 45               | 1                | 0              | -2.066873               | -0.757765 | -3.533926 |
| 46               | 1                | 0              | -0.563336               | 0.023136  | -2.982798 |
| 47               | 1                | 0              | -2.140032               | 0.539167  | -2.318152 |
| 48               | 1                | 0              | 2.077249                | 0.988685  | 3.519308  |
| 49               | 1                | 0              | 2.151992                | -0.308502 | 2.303905  |
| 50               | 1                | 0              | 0.574545                | 0.206719  | 2.967307  |
| 51               | 6                | 0              | -8.113852               | -0.132907 | -0.472082 |
| 52               | 9                | 0              | -7.732339               | 0.815334  | -1.343090 |

|    |   |   |           |           |           |
|----|---|---|-----------|-----------|-----------|
| 53 | 9 | 0 | -9.455113 | -0.127605 | -0.400375 |
| 54 | 9 | 0 | -7.725276 | -1.315897 | -0.982014 |
| 55 | 6 | 0 | 8.084398  | -0.434094 | 0.476513  |
| 56 | 9 | 0 | 7.740370  | 0.434094  | 1.441488  |
| 57 | 9 | 0 | 9.424904  | -0.500642 | 0.424327  |
| 58 | 9 | 0 | 7.618482  | -1.641276 | 0.848197  |

### Compound 6a

|                                              |              |
|----------------------------------------------|--------------|
| Zero-point correction=                       | 0.479085     |
| (Hartree/Particle)                           |              |
| Thermal correction to Energy=                | 0.512487     |
| Thermal correction to Enthalpy=              | 0.513431     |
| Thermal correction to Gibbs Free Energy=     | 0.413154     |
| Sum of electronic and zero-point Energies=   | -2178.476210 |
| Sum of electronic and thermal Energies=      | -2178.442808 |
| Sum of electronic and thermal Enthalpies=    | -2178.441864 |
| Sum of electronic and thermal Free Energies= | -2178.542141 |

| Center Number | Atomic Number | Atomic Type | Coordinates (Angstroms) |           |           |
|---------------|---------------|-------------|-------------------------|-----------|-----------|
|               |               |             | X                       | Y         | Z         |
| 1             | 6             | 0           | -5.079130               | 1.182535  | -0.035866 |
| 2             | 6             | 0           | -5.771229               | -0.016867 | -0.182592 |
| 3             | 6             | 0           | -5.083378               | -1.221058 | -0.335143 |
| 4             | 6             | 0           | -3.690386               | -1.229079 | -0.319926 |
| 5             | 6             | 0           | -2.963200               | -0.029649 | -0.179838 |
| 6             | 6             | 0           | -3.686938               | 1.168601  | -0.022840 |
| 7             | 6             | 0           | -1.474365               | -0.007007 | -0.186464 |
| 8             | 6             | 0           | -0.709674               | -1.257853 | 0.252338  |
| 9             | 6             | 0           | 0.783294                | -1.048485 | 0.358715  |
| 10            | 6             | 0           | 1.475563                | 0.036377  | -0.030698 |
| 11            | 6             | 0           | 0.710826                | 1.287366  | -0.469790 |
| 12            | 6             | 0           | -0.782513               | 1.078673  | -0.574310 |
| 13            | 6             | 0           | 2.964567                | 0.057806  | -0.035875 |
| 14            | 6             | 0           | 3.687358                | -1.142164 | -0.185436 |
| 15            | 6             | 0           | 5.079497                | -1.157012 | -0.175067 |
| 16            | 6             | 0           | 5.772592                | 0.041053  | -0.021360 |
| 17            | 6             | 0           | 5.086236                | 1.251063  | 0.083202  |
| 18            | 6             | 0           | 3.692979                | 1.259113  | 0.080161  |
| 19            | 8             | 0           | 0.935605                | 2.391583  | 0.415403  |
| 20            | 6             | 0           | 0.651439                | 2.202358  | 1.792934  |
| 21            | 8             | 0           | -0.932127               | -2.362422 | -0.632089 |
| 22            | 6             | 0           | -0.647699               | -2.172665 | -2.010188 |
| 23            | 8             | 0           | 1.224086                | 1.839394  | -1.668485 |
| 24            | 6             | 0           | 1.168746                | 1.017786  | -2.823366 |
| 25            | 8             | 0           | -1.224590               | -1.809575 | 1.451500  |
| 26            | 6             | 0           | -1.167372               | -0.987539 | 2.605287  |
| 27            | 1             | 0           | -5.644707               | 2.103583  | 0.072137  |
| 28            | 16            | 0           | -7.591798               | 0.050528  | -0.250652 |
| 29            | 1             | 0           | -5.623041               | -2.156050 | -0.466510 |
| 30            | 1             | 0           | -3.155678               | -2.164532 | -0.420329 |
| 31            | 1             | 0           | -3.154936               | 2.102208  | 0.130595  |
| 32            | 1             | 0           | 1.292535                | -1.934544 | 0.729118  |
| 33            | 1             | 0           | -1.292009               | 1.964290  | -0.945375 |
| 34            | 1             | 0           | 3.155102                | -2.075691 | -0.337822 |
| 35            | 1             | 0           | 5.643937                | -2.075862 | -0.304996 |
| 36            | 16            | 0           | 7.594391                | -0.010239 | -0.080399 |
| 37            | 1             | 0           | 5.627734                | 2.190833  | 0.162299  |
| 38            | 1             | 0           | 3.159310                | 2.197266  | 0.157593  |
| 39            | 1             | 0           | 0.806637                | 3.176259  | 2.261991  |
| 40            | 1             | 0           | 1.325352                | 1.471968  | 2.258782  |

|    |   |   |           |           |           |
|----|---|---|-----------|-----------|-----------|
| 41 | 1 | 0 | -0.385213 | 1.888629  | 1.962927  |
| 42 | 1 | 0 | -0.801702 | -3.146751 | -2.479077 |
| 43 | 1 | 0 | 0.388587  | -1.857776 | -2.179538 |
| 44 | 1 | 0 | -1.322651 | -1.443244 | -2.475719 |
| 45 | 1 | 0 | 1.538908  | 1.633228  | -3.645620 |
| 46 | 1 | 0 | 0.144817  | 0.696205  | -3.052838 |
| 47 | 1 | 0 | 1.810055  | 0.131590  | -2.730396 |
| 48 | 1 | 0 | -1.536476 | -1.602033 | 3.428917  |
| 49 | 1 | 0 | -1.807942 | -0.100598 | 2.512638  |
| 50 | 1 | 0 | -0.143130 | -0.665767 | 2.833477  |
| 51 | 8 | 0 | 7.989453  | -1.442196 | -0.367015 |
| 52 | 6 | 0 | 7.861202  | 0.270316  | 1.717329  |
| 53 | 1 | 0 | 7.381615  | -0.537156 | 2.274662  |
| 54 | 1 | 0 | 7.449500  | 1.240984  | 2.004092  |
| 55 | 1 | 0 | 8.940389  | 0.254235  | 1.884502  |
| 56 | 8 | 0 | -7.984378 | 1.509643  | -0.176192 |
| 57 | 6 | 0 | -7.885651 | -0.672460 | 1.414494  |
| 58 | 1 | 0 | -7.420643 | -0.029611 | 2.164882  |
| 59 | 1 | 0 | -7.471410 | -1.682671 | 1.455297  |
| 60 | 1 | 0 | -8.967404 | -0.702287 | 1.561949  |

### Compound 7a

|                                              |              |
|----------------------------------------------|--------------|
| Zero-point correction=                       | 0.411653     |
| (Hartree/Particle)                           |              |
| Thermal correction to Energy=                | 0.440080     |
| Thermal correction to Enthalpy=              | 0.441024     |
| Thermal correction to Gibbs Free Energy=     | 0.352339     |
| Sum of electronic and zero-point Energies=   | -1337.677344 |
| Sum of electronic and thermal Energies=      | -1337.648918 |
| Sum of electronic and thermal Enthalpies=    | -1337.647974 |
| Sum of electronic and thermal Free Energies= | -1337.736659 |

| Center<br>Number | Atomic<br>Number | Atomic<br>Type | Coordinates (Angstroms) |           |           |
|------------------|------------------|----------------|-------------------------|-----------|-----------|
|                  |                  |                | X                       | Y         | Z         |
| 1                | 6                | 0              | -5.162452               | 0.898182  | 0.281103  |
| 2                | 6                | 0              | -5.771419               | -0.247734 | -0.253238 |
| 3                | 6                | 0              | -4.966985               | -1.320295 | -0.673794 |
| 4                | 6                | 0              | -3.586830               | -1.241139 | -0.549122 |
| 5                | 6                | 0              | -2.959727               | -0.109260 | 0.011080  |
| 6                | 6                | 0              | -3.779096               | 0.966459  | 0.407126  |
| 7                | 6                | 0              | -1.476744               | -0.066748 | 0.145973  |
| 8                | 6                | 0              | -0.771081               | 1.290888  | 0.199855  |
| 9                | 6                | 0              | 0.737380                | 1.188929  | 0.193958  |
| 10               | 6                | 0              | 1.476736                | 0.066942  | 0.145786  |
| 11               | 6                | 0              | 0.771051                | -1.290661 | 0.200499  |
| 12               | 6                | 0              | -0.737421               | -1.188727 | 0.194844  |
| 13               | 6                | 0              | 2.959726                | 0.109349  | 0.010854  |
| 14               | 6                | 0              | 3.778987                | -0.966443 | 0.406966  |
| 15               | 6                | 0              | 5.162341                | -0.898400 | 0.280847  |
| 16               | 6                | 0              | 5.771467                | 0.247371  | -0.253614 |
| 17               | 6                | 0              | 4.967158                | 1.320002  | -0.674245 |
| 18               | 6                | 0              | 3.587004                | 1.241076  | -0.549485 |
| 19               | 6                | 0              | -7.196985               | -0.319357 | -0.383006 |
| 20               | 7                | 0              | -8.354220               | -0.379321 | -0.487722 |
| 21               | 6                | 0              | 7.197045                | 0.318789  | -0.383351 |
| 22               | 7                | 0              | 8.354335                | 0.378899  | -0.487362 |
| 23               | 8                | 0              | 1.184008                | -2.143869 | -0.856761 |
| 24               | 6                | 0              | 1.010464                | -1.662839 | -2.181386 |

|    |   |   |           |           |           |
|----|---|---|-----------|-----------|-----------|
| 25 | 8 | 0 | 1.183143  | -2.077416 | 1.316356  |
| 26 | 6 | 0 | 0.946404  | -1.554966 | 2.614487  |
| 27 | 8 | 0 | -1.182985 | 2.078168  | 1.315426  |
| 28 | 6 | 0 | -0.945931 | 1.556409  | 2.613775  |
| 29 | 8 | 0 | -1.184328 | 2.143547  | -0.857694 |
| 30 | 6 | 0 | -1.011000 | 1.661890  | -2.182121 |
| 31 | 1 | 0 | -5.778060 | 1.734211  | 0.596003  |
| 32 | 1 | 0 | -5.428333 | -2.200947 | -1.107934 |
| 33 | 1 | 0 | -2.986221 | -2.066495 | -0.915467 |
| 34 | 1 | 0 | -3.322669 | 1.859335  | 0.812164  |
| 35 | 1 | 0 | 1.204470  | 2.170147  | 0.209906  |
| 36 | 1 | 0 | -1.204546 | -2.169912 | 0.211475  |
| 37 | 1 | 0 | 3.322476  | -1.859206 | 0.812154  |
| 38 | 1 | 0 | 5.777828  | -1.734517 | 0.595748  |
| 39 | 1 | 0 | 5.428591  | 2.200566  | -1.108467 |
| 40 | 1 | 0 | 2.986564  | 2.066531  | -0.915888 |
| 41 | 1 | 0 | 1.316866  | -2.481137 | -2.835702 |
| 42 | 1 | 0 | 1.640716  | -0.789171 | -2.390467 |
| 43 | 1 | 0 | -0.034761 | -1.407544 | -2.396878 |
| 44 | 1 | 0 | 1.283845  | -2.326421 | 3.309348  |
| 45 | 1 | 0 | 1.517037  | -0.636073 | 2.800539  |
| 46 | 1 | 0 | -0.117393 | -1.358372 | 2.792456  |
| 47 | 1 | 0 | -1.283247 | 2.328222  | 3.308299  |
| 48 | 1 | 0 | -1.516492 | 0.637595  | 2.800444  |
| 49 | 1 | 0 | 0.117912  | 1.359933  | 2.791606  |
| 50 | 1 | 0 | -1.317656 | 2.479822  | -2.836776 |
| 51 | 1 | 0 | 0.034207  | 1.406613  | -2.397713 |
| 52 | 1 | 0 | -1.641194 | 0.788042  | -2.390632 |

### Compound 8a

|                                              |              |
|----------------------------------------------|--------------|
| Zero-point correction=                       | 0.410248     |
| (Hartree/Particle)                           |              |
| Thermal correction to Energy=                | 0.438925     |
| Thermal correction to Enthalpy=              | 0.439870     |
| Thermal correction to Gibbs Free Energy=     | 0.350881     |
| Sum of electronic and zero-point Energies=   | -1337.610153 |
| Sum of electronic and thermal Energies=      | -1337.581475 |
| Sum of electronic and thermal Enthalpies=    | -1337.580531 |
| Sum of electronic and thermal Free Energies= | -1337.669520 |

| Center<br>Number | Atomic<br>Number | Atomic<br>Type | Coordinates (Angstroms) |           |           |
|------------------|------------------|----------------|-------------------------|-----------|-----------|
|                  |                  |                | X                       | Y         | Z         |
| 1                | 6                | 0              | -5.165402               | 0.893532  | 0.277905  |
| 2                | 6                | 0              | -5.764048               | -0.252915 | -0.256556 |
| 3                | 6                | 0              | -4.966886               | -1.325677 | -0.677336 |
| 4                | 6                | 0              | -3.586539               | -1.243902 | -0.550318 |
| 5                | 6                | 0              | -2.959524               | -0.112574 | 0.010177  |
| 6                | 6                | 0              | -3.781787               | 0.961356  | 0.404795  |
| 7                | 6                | 0              | -1.477093               | -0.069146 | 0.146613  |
| 8                | 6                | 0              | -0.772819               | 1.289177  | 0.200164  |
| 9                | 6                | 0              | 0.735472                | 1.189796  | 0.195780  |
| 10               | 6                | 0              | 1.477093                | 0.069216  | 0.146463  |
| 11               | 6                | 0              | 0.772823                | -1.289082 | 0.200670  |
| 12               | 6                | 0              | -0.735468               | -1.189704 | 0.196378  |
| 13               | 6                | 0              | 2.959517                | 0.112573  | 0.009945  |
| 14               | 6                | 0              | 3.781781                | -0.961191 | 0.405015  |
| 15               | 6                | 0              | 5.165391                | -0.893445 | 0.278037  |
| 16               | 6                | 0              | 5.764034                | 0.252757  | -0.256953 |

|    |   |   |           |           |           |
|----|---|---|-----------|-----------|-----------|
| 17 | 6 | 0 | 4.966868  | 1.325334  | -0.678200 |
| 18 | 6 | 0 | 3.586526  | 1.243638  | -0.551087 |
| 19 | 7 | 0 | -7.140101 | -0.323446 | -0.383677 |
| 20 | 6 | 0 | -8.315223 | -0.384972 | -0.491143 |
| 21 | 7 | 0 | 7.140084  | 0.323219  | -0.384144 |
| 22 | 6 | 0 | 8.315234  | 0.384933  | -0.491198 |
| 23 | 8 | 0 | 1.187416  | -2.142144 | -0.856807 |
| 24 | 6 | 0 | 1.013108  | -1.660053 | -2.180505 |
| 25 | 8 | 0 | 1.187571  | -2.076058 | 1.316392  |
| 26 | 6 | 0 | 0.952192  | -1.552452 | 2.613888  |
| 27 | 8 | 0 | -1.187460 | 2.076635  | 1.315584  |
| 28 | 6 | 0 | -0.951933 | 1.553607  | 2.613287  |
| 29 | 8 | 0 | -1.187508 | 2.141782  | -0.857644 |
| 30 | 6 | 0 | -1.013336 | 1.659113  | -2.181147 |
| 31 | 1 | 0 | -5.789702 | 1.723985  | 0.589444  |
| 32 | 1 | 0 | -5.435417 | -2.201993 | -1.111829 |
| 33 | 1 | 0 | -2.985830 | -2.069536 | -0.916089 |
| 34 | 1 | 0 | -3.327667 | 1.855182  | 0.810459  |
| 35 | 1 | 0 | 1.201327  | 2.171635  | 0.212684  |
| 36 | 1 | 0 | -1.201322 | -2.171535 | 0.213739  |
| 37 | 1 | 0 | 3.327664  | -1.854825 | 0.811104  |
| 38 | 1 | 0 | 5.789691  | -1.723768 | 0.589924  |
| 39 | 1 | 0 | 5.435394  | 2.201445  | -1.113112 |
| 40 | 1 | 0 | 2.985816  | 2.069115  | -0.917209 |
| 41 | 1 | 0 | 1.319069  | -2.477625 | -2.836116 |
| 42 | 1 | 0 | 1.643212  | -0.786090 | -2.388994 |
| 43 | 1 | 0 | -0.032283 | -1.404425 | -2.395070 |
| 44 | 1 | 0 | 1.288647  | -2.323776 | 3.309535  |
| 45 | 1 | 0 | 1.524224  | -0.634166 | 2.799070  |
| 46 | 1 | 0 | -0.111241 | -1.353824 | 2.792006  |
| 47 | 1 | 0 | -1.288308 | 2.325240  | 3.308629  |
| 48 | 1 | 0 | -1.523944 | 0.635403  | 2.798941  |
| 49 | 1 | 0 | 0.111520  | 1.355057  | 2.791371  |
| 50 | 1 | 0 | -1.319351 | 2.476402  | -2.837085 |
| 51 | 1 | 0 | 0.032031  | 1.403377  | -2.395705 |
| 52 | 1 | 0 | -1.643472 | 0.785066  | -2.389194 |

## Compound 9

Zero-point correction= 0.408457  
 (Hartree/Particle)  
 Thermal correction to Energy= 0.441234  
 Thermal correction to Enthalpy= 0.442178  
 Thermal correction to Gibbs Free Energy= 0.337888  
 Sum of electronic and zero-point Energies= -1488.824377  
 Sum of electronic and thermal Energies= -1488.791600  
 Sum of electronic and thermal Enthalpies= -1488.790656  
 Sum of electronic and thermal Free Energies= -1488.894946

| Center<br>Number | Atomic<br>Number | Atomic<br>Type | Coordinates (Angstroms) |           |           |
|------------------|------------------|----------------|-------------------------|-----------|-----------|
|                  |                  |                | X                       | Y         | Z         |
| 1                | 6                | 0              | -0.615237               | 1.168186  | 0.044387  |
| 2                | 6                | 0              | -1.376276               | -0.015158 | -0.035282 |
| 3                | 6                | 0              | -0.691509               | -1.254555 | -0.094206 |
| 4                | 6                | 0              | 0.697093                | -1.285979 | -0.076652 |

|    |   |   |           |           |           |
|----|---|---|-----------|-----------|-----------|
| 5  | 6 | 0 | 1.457699  | -0.102553 | 0.004523  |
| 6  | 6 | 0 | 0.773252  | 1.136634  | 0.062472  |
| 7  | 8 | 0 | 1.465095  | 2.322475  | 0.092031  |
| 8  | 6 | 0 | 1.971386  | 2.698725  | 1.375862  |
| 9  | 8 | 0 | -1.380490 | -2.441348 | -0.124479 |
| 10 | 6 | 0 | -1.906116 | -2.807994 | -1.404230 |
| 11 | 6 | 0 | 2.877130  | -0.157720 | -0.006273 |
| 12 | 6 | 0 | -2.794829 | 0.043656  | -0.024168 |
| 13 | 6 | 0 | -4.008115 | 0.129938  | -0.013943 |
| 14 | 6 | 0 | 4.091359  | -0.237569 | -0.022969 |
| 15 | 6 | 0 | 5.512147  | -0.281080 | -0.066349 |
| 16 | 6 | 0 | -5.426750 | 0.195970  | 0.004208  |
| 17 | 6 | 0 | 6.222452  | -1.505101 | 0.036309  |
| 18 | 6 | 0 | 7.615109  | -1.519916 | -0.076040 |
| 19 | 6 | 0 | 8.327097  | -0.342981 | -0.274675 |
| 20 | 6 | 0 | 7.639377  | 0.880956  | -0.357830 |
| 21 | 6 | 0 | 6.242993  | 0.904537  | -0.258460 |
| 22 | 6 | 0 | -6.093828 | 1.453199  | -0.025819 |
| 23 | 6 | 0 | -7.492920 | 1.503237  | -0.010319 |
| 24 | 6 | 0 | -8.238177 | 0.328546  | 0.033773  |
| 25 | 6 | 0 | -7.596373 | -0.919330 | 0.064423  |
| 26 | 6 | 0 | -6.194992 | -0.974248 | 0.050065  |
| 27 | 8 | 0 | -5.291236 | 2.539537  | -0.068814 |
| 28 | 6 | 0 | -5.885085 | 3.832805  | -0.103206 |
| 29 | 6 | 0 | -8.364534 | -2.127428 | 0.109088  |
| 30 | 7 | 0 | -8.990772 | -3.107578 | 0.143947  |
| 31 | 8 | 0 | 5.576977  | -2.700063 | 0.181834  |
| 32 | 6 | 0 | 4.966955  | -2.944252 | 1.456249  |
| 33 | 6 | 0 | 8.363335  | 2.103291  | -0.551321 |
| 34 | 7 | 0 | 8.953687  | 3.093947  | -0.704667 |
| 35 | 1 | 0 | -1.116512 | 2.128594  | 0.088087  |
| 36 | 1 | 0 | 1.196363  | -2.247237 | -0.126484 |
| 37 | 1 | 0 | 2.480960  | 3.653952  | 1.236375  |
| 38 | 1 | 0 | 1.155517  | 2.823664  | 2.099260  |
| 39 | 1 | 0 | 2.684600  | 1.959705  | 1.758200  |
| 40 | 1 | 0 | -2.415123 | -3.763264 | -1.263303 |
| 41 | 1 | 0 | -1.100242 | -2.929952 | -2.139087 |
| 42 | 1 | 0 | -2.622713 | -2.064927 | -1.771198 |
| 43 | 1 | 0 | 8.122961  | -2.476035 | -0.008333 |
| 44 | 1 | 0 | 9.408244  | -0.360417 | -0.359098 |
| 45 | 1 | 0 | 5.709430  | 1.844304  | -0.344244 |
| 46 | 1 | 0 | -8.009061 | 2.454854  | -0.032978 |
| 47 | 1 | 0 | -9.321767 | 0.375602  | 0.044888  |
| 48 | 1 | 0 | -5.689725 | -1.932825 | 0.077119  |
| 49 | 1 | 0 | -5.054777 | 4.538572  | -0.135629 |
| 50 | 1 | 0 | -6.508020 | 3.963973  | -0.996003 |
| 51 | 1 | 0 | -6.487254 | 4.021038  | 0.793658  |
| 52 | 1 | 0 | 4.496007  | -3.925509 | 1.380862  |
| 53 | 1 | 0 | 5.724615  | -2.963631 | 2.249252  |
| 54 | 1 | 0 | 4.207462  | -2.192743 | 1.691431  |

## Compound 9a

|                                              |              |
|----------------------------------------------|--------------|
| Zero-point correction=<br>(Hartree/Particle) | 0.495893     |
| Thermal correction to Energy=                | 0.534241     |
| Thermal correction to Enthalpy=              | 0.535185     |
| Thermal correction to Gibbs Free Energy=     | 0.419918     |
| Sum of electronic and zero-point Energies=   | -1718.947304 |

Sum of electronic and thermal Energies= -1718.908956  
Sum of electronic and thermal Enthalpies= -1718.908011  
Sum of electronic and thermal Free Energies= -1719.023279

| Center<br>Number | Atomic<br>Number | Atomic<br>Type | Coordinates (Angstroms) |           |           |
|------------------|------------------|----------------|-------------------------|-----------|-----------|
|                  |                  |                | X                       | Y         | Z         |
| 1                | 6                | 0              | -0.698792               | 1.231285  | 0.005530  |
| 2                | 6                | 0              | -1.447844               | 0.109822  | 0.005866  |
| 3                | 6                | 0              | -0.811044               | -1.286559 | 0.005713  |
| 4                | 6                | 0              | 0.698508                | -1.237028 | 0.004406  |
| 5                | 6                | 0              | 1.447589                | -0.115585 | 0.003439  |
| 6                | 6                | 0              | 0.810772                | 1.280860  | 0.004052  |
| 7                | 8                | 0              | 1.276310                | 2.063487  | -1.081688 |
| 8                | 6                | 0              | 1.038957                | 1.568167  | -2.389576 |
| 9                | 8                | 0              | -1.278613               | -2.069463 | -1.078963 |
| 10               | 6                | 0              | -1.043847               | -1.574301 | -2.387379 |
| 11               | 6                | 0              | 2.868031                | -0.160604 | 0.001611  |
| 12               | 6                | 0              | -2.868283               | 0.155149  | 0.006695  |
| 13               | 6                | 0              | -4.083601               | 0.183962  | 0.002506  |
| 14               | 6                | 0              | 4.083438                | -0.185756 | -0.000336 |
| 15               | 6                | 0              | 5.504061                | -0.179254 | -0.002148 |
| 16               | 6                | 0              | -5.504226               | 0.180669  | -0.000616 |
| 17               | 6                | 0              | 6.236127                | -1.399447 | -0.003633 |
| 18               | 6                | 0              | 7.636236                | -1.374906 | -0.005477 |
| 19               | 6                | 0              | 8.316961                | -0.161058 | -0.005889 |
| 20               | 6                | 0              | 7.609812                | 1.051606  | -0.004463 |
| 21               | 6                | 0              | 6.207337                | 1.032012  | -0.002593 |
| 22               | 6                | 0              | -6.233420               | 1.402593  | -0.002839 |
| 23               | 6                | 0              | -7.633569               | 1.381373  | -0.006066 |
| 24               | 6                | 0              | -8.317166               | 0.169137  | -0.007112 |
| 25               | 6                | 0              | -7.612888               | -1.045192 | -0.004972 |
| 26               | 6                | 0              | -6.210383               | -1.028927 | -0.001743 |
| 27               | 8                | 0              | -5.486923               | 2.529270  | -0.001582 |
| 28               | 6                | 0              | -6.145996               | 3.790819  | -0.003418 |
| 29               | 6                | 0              | -8.321435               | -2.290142 | -0.006040 |
| 30               | 7                | 0              | -8.902563               | -3.298275 | -0.006929 |
| 31               | 8                | 0              | 5.492340                | -2.527915 | -0.003149 |
| 32               | 6                | 0              | 6.154504                | -3.787837 | -0.004536 |
| 33               | 6                | 0              | 8.315411                | 2.298224  | -0.004920 |
| 34               | 7                | 0              | 8.894187                | 3.307711  | -0.005362 |
| 35               | 1                | 0              | -1.171353               | 2.210012  | 0.005986  |
| 36               | 6                | 0              | -1.039189               | -1.573697 | 2.399410  |
| 37               | 1                | 0              | 1.430415                | 2.328288  | -3.068616 |
| 38               | 1                | 0              | 1.565499                | 0.623504  | -2.576288 |
| 39               | 1                | 0              | -0.030056               | 1.426583  | -2.593924 |
| 40               | 1                | 0              | -1.436655               | -2.334507 | -3.065550 |
| 41               | 1                | 0              | 0.024764                | -1.432726 | -2.593845 |
| 42               | 1                | 0              | -1.570745               | -0.629642 | -2.573151 |
| 43               | 1                | 0              | 8.202636                | -2.297833 | -0.006618 |
| 44               | 1                | 0              | 9.401622                | -0.149623 | -0.007340 |
| 45               | 1                | 0              | 5.648952                | 1.961183  | -0.001484 |
| 46               | 1                | 0              | -8.197779               | 2.305641  | -0.007754 |
| 47               | 1                | 0              | -9.401848               | 0.160275  | -0.009599 |
| 48               | 1                | 0              | -5.654220               | -1.959427 | -0.000042 |
| 49               | 1                | 0              | -5.352859               | 4.538837  | -0.001733 |
| 50               | 1                | 0              | -6.764022               | 3.918615  | -0.900145 |
| 51               | 1                | 0              | -6.768216               | 3.919022  | 0.890342  |
| 52               | 1                | 0              | 5.363202                | -4.537806 | -0.003763 |
| 53               | 1                | 0              | 6.773732                | -3.913966 | -0.900670 |

|    |   |   |           |           |          |
|----|---|---|-----------|-----------|----------|
| 54 | 1 | 0 | 6.776158  | -3.914665 | 0.889816 |
| 55 | 8 | 0 | 1.278661  | 2.063442  | 1.088821 |
| 56 | 6 | 0 | 1.043301  | 1.568517  | 2.397220 |
| 57 | 1 | 0 | 1.437089  | 2.328192  | 3.075415 |
| 58 | 1 | 0 | 1.568966  | 0.623166  | 2.582945 |
| 59 | 1 | 0 | -0.025491 | 1.428297  | 2.603707 |
| 60 | 8 | 0 | -1.277044 | -2.068828 | 1.091548 |
| 61 | 1 | 0 | 1.171048  | -2.215770 | 0.003931 |
| 62 | 1 | 0 | 0.029978  | -1.433367 | 2.603828 |
| 63 | 1 | 0 | -1.431609 | -2.333296 | 3.078477 |
| 64 | 1 | 0 | -1.564585 | -0.628378 | 2.586048 |

## Compound 10

|                                              |              |
|----------------------------------------------|--------------|
| Zero-point correction=                       | 0.377194     |
| (Hartree/Particle)                           |              |
| Thermal correction to Energy=                | 0.405545     |
| Thermal correction to Enthalpy=              | 0.406489     |
| Thermal correction to Gibbs Free Energy=     | 0.312380     |
| Sum of electronic and zero-point Energies=   | -1282.093751 |
| Sum of electronic and thermal Energies=      | -1282.065400 |
| Sum of electronic and thermal Enthalpies=    | -1282.064456 |
| Sum of electronic and thermal Free Energies= | -1282.158565 |

| Center<br>Number | Atomic<br>Number | Atomic<br>Type | Coordinates (Angstroms) |           |           |
|------------------|------------------|----------------|-------------------------|-----------|-----------|
|                  |                  |                | X                       | Y         | Z         |
| 1                | 6                | 0              | -1.553031               | -1.275571 | 0.022842  |
| 2                | 6                | 0              | -2.323508               | -0.097252 | -0.039894 |
| 3                | 6                | 0              | -1.645379               | 1.146856  | -0.084260 |
| 4                | 6                | 0              | -0.257096               | 1.187163  | -0.067010 |
| 5                | 6                | 0              | 0.511980                | 0.008239  | -0.000966 |
| 6                | 6                | 0              | -0.164638               | -1.235474 | 0.040238  |
| 7                | 8                | 0              | 0.535252                | -2.417140 | 0.053389  |
| 8                | 6                | 0              | 1.037235                | -2.810956 | 1.333393  |
| 9                | 8                | 0              | -2.338889               | 2.331944  | -0.100566 |
| 10               | 6                | 0              | -2.889803               | 2.697059  | -1.369692 |
| 11               | 6                | 0              | 1.931035                | 0.072846  | -0.010604 |
| 12               | 6                | 0              | -3.742128               | -0.164421 | -0.026483 |
| 13               | 6                | 0              | -4.956204               | -0.249379 | -0.013081 |
| 14               | 6                | 0              | 3.144751                | 0.161374  | -0.025117 |
| 15               | 6                | 0              | 4.565233                | 0.214632  | -0.066109 |
| 16               | 6                | 0              | -6.377378               | -0.339163 | 0.008112  |
| 17               | 6                | 0              | 5.268157                | 1.441044  | 0.057379  |
| 18               | 6                | 0              | 6.660785                | 1.466367  | -0.053266 |
| 19               | 6                | 0              | 7.380467                | 0.297436  | -0.270473 |
| 20               | 6                | 0              | 6.700332                | -0.929134 | -0.374231 |
| 21               | 6                | 0              | 5.303988                | -0.963000 | -0.276725 |
| 22               | 6                | 0              | -7.017991               | -1.592554 | -0.073608 |
| 23               | 6                | 0              | -8.407439               | -1.673977 | -0.053835 |
| 24               | 6                | 0              | -9.180478               | -0.514274 | 0.047115  |
| 25               | 6                | 0              | -8.555266               | 0.732822  | 0.129257  |
| 26               | 6                | 0              | -7.166547               | 0.824954  | 0.110376  |
| 27               | 1                | 0              | -6.414160               | -2.490808 | -0.152681 |
| 28               | 1                | 0              | -9.152473               | 1.636508  | 0.209193  |
| 29               | 8                | 0              | 4.616108                | 2.630197  | 0.221795  |
| 30               | 6                | 0              | 3.996967                | 2.847287  | 1.496588  |
| 31               | 6                | 0              | 7.432393                | -2.143452 | -0.586776 |



|    |   |   |            |           |           |
|----|---|---|------------|-----------|-----------|
| 32 | 7 | 0 | 8.029992   | -3.127263 | -0.755487 |
| 33 | 1 | 0 | -2.046149  | -2.240756 | 0.054339  |
| 34 | 1 | 0 | 0.235268   | 2.152514  | -0.105577 |
| 35 | 1 | 0 | 1.553133   | -3.760903 | 1.181457  |
| 36 | 1 | 0 | 1.744192   | -2.073872 | 1.731089  |
| 37 | 1 | 0 | 0.218708   | -2.952283 | 2.050775  |
| 38 | 1 | 0 | -3.398532  | 3.651125  | -1.218778 |
| 39 | 1 | 0 | -3.611459  | 1.952732  | -1.723229 |
| 40 | 1 | 0 | -2.098088  | 2.822076  | -2.119482 |
| 41 | 1 | 0 | 7.162424   | 2.424472  | 0.030869  |
| 42 | 1 | 0 | 8.461568   | 0.322969  | -0.353406 |
| 43 | 1 | 0 | 4.776343   | -1.904524 | -0.378386 |
| 44 | 1 | 0 | -8.889441  | -2.645190 | -0.117710 |
| 45 | 1 | 0 | -10.264268 | -0.582069 | 0.062249  |
| 46 | 1 | 0 | -6.676533  | 1.790886  | 0.177483  |
| 47 | 1 | 0 | 3.522966   | 3.828216  | 1.437170  |
| 48 | 1 | 0 | 3.238687   | 2.088836  | 1.712314  |
| 49 | 1 | 0 | 4.749474   | 2.854064  | 2.294754  |

## Compound 10a

Zero-point correction= 0.464668  
 (Hartree/Particle)  
 Thermal correction to Energy= 0.498568  
 Thermal correction to Enthalpy= 0.499512  
 Thermal correction to Gibbs Free Energy= 0.394768  
 Sum of electronic and zero-point Energies= -1512.216689  
 Sum of electronic and thermal Energies= -1512.182788  
 Sum of electronic and thermal Enthalpies= -1512.181844  
 Sum of electronic and thermal Free Energies= -1512.286588

| Center<br>Number | Atomic<br>Number | Atomic<br>Type | Coordinates (Angstroms) |           |           |
|------------------|------------------|----------------|-------------------------|-----------|-----------|
|                  |                  |                | X                       | Y         | Z         |
| 1                | 6                | 0              | 0.131783                | 1.152303  | -0.000245 |
| 2                | 6                | 0              | -0.623414               | 0.035130  | 0.000115  |
| 3                | 6                | 0              | 0.006367                | -1.364351 | 0.000542  |
| 4                | 6                | 0              | 1.515871                | -1.322047 | 0.000409  |
| 5                | 6                | 0              | 2.272763                | -0.205528 | 0.000016  |
| 6                | 6                | 0              | 1.641690                | 1.193898  | -0.000388 |
| 7                | 8                | 0              | 2.109022                | 1.975922  | -1.086201 |
| 8                | 6                | 0              | 1.884060                | 1.472754  | -2.393116 |
| 9                | 8                | 0              | -0.466288               | -2.144608 | -1.084282 |
| 10               | 6                | 0              | -0.223552               | -1.653428 | -2.392441 |
| 11               | 6                | 0              | 3.693156                | -0.254715 | -0.000098 |
| 12               | 6                | 0              | -2.043668               | 0.089125  | 0.000172  |
| 13               | 6                | 0              | -3.258836               | 0.124060  | -0.000098 |
| 14               | 6                | 0              | 4.909479                | -0.272856 | -0.000281 |
| 15               | 6                | 0              | 6.333802                | -0.280516 | -0.000443 |
| 16               | 6                | 0              | -4.679450               | 0.129907  | 0.000084  |
| 17               | 6                | 0              | 7.048134                | -1.495695 | -0.000164 |
| 18               | 6                | 0              | 8.440268                | -1.491700 | -0.000345 |
| 19               | 6                | 0              | 9.141345                | -0.282929 | -0.000804 |
| 20               | 6                | 0              | 8.442063                | 0.927048  | -0.001082 |
| 21               | 6                | 0              | 7.050073                | 0.934021  | -0.000908 |
| 22               | 6                | 0              | -5.400710               | 1.356541  | 0.000092  |

|    |   |   |           |           |           |
|----|---|---|-----------|-----------|-----------|
| 23 | 6 | 0 | -6.800896 | 1.344813  | 0.000300  |
| 24 | 6 | 0 | -7.492717 | 0.137206  | 0.000478  |
| 25 | 6 | 0 | -6.796494 | -1.081696 | 0.000452  |
| 26 | 6 | 0 | -5.393816 | -1.074853 | 0.000250  |
| 27 | 8 | 0 | -4.646681 | 2.478461  | -0.000084 |
| 28 | 6 | 0 | -5.297415 | 3.744032  | -0.000048 |
| 29 | 6 | 0 | -7.513747 | -2.321643 | 0.000634  |
| 30 | 7 | 0 | -8.102586 | -3.325303 | 0.000782  |
| 31 | 1 | 0 | 6.499320  | -2.432008 | 0.000190  |
| 32 | 1 | 0 | -0.335219 | 2.133699  | -0.000525 |
| 33 | 6 | 0 | -0.222954 | -1.651792 | 2.393766  |
| 34 | 1 | 0 | 2.272283  | 2.233513  | -3.073450 |
| 35 | 1 | 0 | 2.420664  | 0.532471  | -2.572427 |
| 36 | 1 | 0 | 0.817590  | 1.320376  | -2.603269 |
| 37 | 1 | 0 | -0.617548 | -2.412763 | -3.070952 |
| 38 | 1 | 0 | 0.846573  | -1.517655 | -2.594767 |
| 39 | 1 | 0 | -0.744729 | -0.706253 | -2.582275 |
| 40 | 1 | 0 | 8.980454  | -2.433981 | -0.000136 |
| 41 | 1 | 0 | 10.227422 | -0.283938 | -0.000951 |
| 42 | 1 | 0 | 6.500265  | 1.869547  | -0.001131 |
| 43 | 1 | 0 | -7.358896 | 2.272854  | 0.000326  |
| 44 | 1 | 0 | -8.577437 | 0.135602  | 0.000637  |
| 45 | 1 | 0 | -4.843873 | -2.009041 | 0.000223  |
| 46 | 1 | 0 | -4.499451 | 4.486951  | -0.000215 |
| 47 | 1 | 0 | -5.916943 | 3.876244  | -0.895154 |
| 48 | 1 | 0 | -5.916653 | 3.876339  | 0.895246  |
| 49 | 8 | 0 | 2.109251  | 1.976646  | 1.084804  |
| 50 | 6 | 0 | 1.884517  | 1.474413  | 2.392120  |
| 51 | 1 | 0 | 2.273024  | 2.235582  | 3.071833  |
| 52 | 1 | 0 | 2.421016  | 0.534170  | 2.571957  |
| 53 | 1 | 0 | 0.818075  | 1.322356  | 2.602653  |
| 54 | 8 | 0 | -0.466084 | -2.143844 | 1.086008  |
| 55 | 1 | 0 | 1.981878  | -2.303983 | 0.000685  |
| 56 | 1 | 0 | 0.847238  | -1.515907 | 2.595660  |
| 57 | 1 | 0 | -0.616768 | -2.410657 | 3.072908  |
| 58 | 1 | 0 | -0.744041 | -0.704471 | 2.583116  |
| 59 | 1 | 0 | 8.983866  | 1.868431  | -0.001433 |

-----

### Intermediate A

| Center<br>Number | Atomic<br>Number | Atomic<br>Type | Coordinates (Angstroms) |           |           |
|------------------|------------------|----------------|-------------------------|-----------|-----------|
|                  |                  |                | X                       | Y         | Z         |
| 1                | 1                | 0              | -0.758087               | 0.004241  | 0.027006  |
| 2                | 6                | 0              | -0.468977               | 0.018110  | 1.070367  |
| 3                | 6                | 0              | 0.221928                | 0.040389  | 3.782881  |
| 4                | 6                | 0              | -0.525604               | -1.155535 | 1.813514  |
| 5                | 6                | 0              | -0.080280               | 1.233170  | 1.679120  |
| 6                | 6                | 0              | 0.258709                | 1.220964  | 3.051766  |
| 7                | 6                | 0              | -0.176095               | -1.151939 | 3.167602  |
| 8                | 1                | 0              | -0.846596               | -2.076917 | 1.337405  |
| 9                | 1                | 0              | 0.597783                | 2.135332  | 3.529313  |
| 10               | 1                | 0              | -0.211584               | -2.073535 | 3.740780  |
| 11               | 1                | 0              | 0.509440                | 0.044466  | 4.829747  |
| 12               | 6                | 0              | -0.070522               | 2.505528  | 0.947422  |
| 13               | 6                | 0              | -0.051324               | 5.025547  | -0.460333 |
| 14               | 6                | 0              | -0.483586               | 3.681390  | 1.575345  |
| 15               | 6                | 0              | 0.378522                | 2.615950  | -0.427930 |
| 16               | 6                | 0              | 0.361692                | 3.849678  | -1.088271 |
| 17               | 6                | 0              | -0.500487               | 4.915110  | 0.914984  |

|    |   |   |           |          |           |
|----|---|---|-----------|----------|-----------|
| 18 | 1 | 0 | -0.862300 | 3.613516 | 2.586364  |
| 19 | 1 | 0 | 0.740439  | 3.917557 | -2.099278 |
| 20 | 6 | 0 | -0.041416 | 6.297933 | -1.191977 |
| 21 | 6 | 0 | 0.054740  | 8.683083 | -2.680355 |
| 22 | 6 | 0 | 0.347470  | 7.512904 | -0.583172 |
| 23 | 6 | 0 | -0.380421 | 6.310243 | -2.564619 |
| 24 | 6 | 0 | -0.343472 | 7.490844 | -3.295683 |
| 25 | 6 | 0 | 0.404266  | 8.686573 | -1.326272 |
| 26 | 1 | 0 | 0.636610  | 7.526685 | 0.460183  |
| 27 | 1 | 0 | -0.719632 | 5.395941 | -3.042191 |
| 28 | 1 | 0 | -0.630994 | 7.486862 | -4.342545 |
| 29 | 1 | 0 | 0.725409  | 9.607885 | -0.850134 |
| 30 | 1 | 0 | 0.090363  | 9.604697 | -3.253495 |
| 31 | 8 | 0 | 0.852025  | 1.496923 | -0.973436 |
| 32 | 8 | 0 | -0.974133 | 6.034111 | 1.460419  |
| 33 | 6 | 0 | 1.368421  | 1.493562 | -2.315337 |
| 34 | 1 | 0 | 0.591229  | 1.784509 | -3.028963 |
| 35 | 1 | 0 | 1.678278  | 0.465775 | -2.498511 |
| 36 | 1 | 0 | 2.230362  | 2.163321 | -2.393037 |
| 37 | 6 | 0 | -1.490832 | 6.037432 | 2.802205  |
| 38 | 1 | 0 | -1.801108 | 7.065125 | 2.985194  |
| 39 | 1 | 0 | -0.713662 | 5.746880 | 3.516020  |
| 40 | 1 | 0 | -2.352519 | 5.367338 | 2.879812  |

-----

Zero-point correction= 0.329294  
 (Hartree/Particle)  
 Thermal correction to Energy= 0.348223  
 Thermal correction to Enthalpy= 0.349167  
 Thermal correction to Gibbs Free Energy= 0.280939  
 Sum of electronic and zero-point Energies= -922.815224  
 Sum of electronic and thermal Energies= -922.796295  
 Sum of electronic and thermal Enthalpies= -922.795351  
 Sum of electronic and thermal Free Energies= -922.863578

### Intermediate B

-----

| Center<br>Number | Atomic<br>Number | Atomic<br>Type | Coordinates (Angstroms) |           |           |
|------------------|------------------|----------------|-------------------------|-----------|-----------|
|                  |                  |                | X                       | Y         | Z         |
| 1                | 1                | 0              | 0.196584                | 2.477535  | 3.359192  |
| 2                | 6                | 0              | 0.188643                | 1.539446  | 2.814985  |
| 3                | 6                | 0              | 0.056329                | -0.904692 | 1.469152  |
| 4                | 6                | 0              | 0.176757                | 0.357035  | 3.535976  |
| 5                | 6                | 0              | 0.133976                | 1.533312  | 1.394489  |
| 6                | 6                | 0              | 0.051174                | 0.276832  | 0.737857  |
| 7                | 6                | 0              | 0.118645                | -0.872193 | 2.864480  |
| 8                | 1                | 0              | 0.203771                | 0.384707  | 4.620703  |
| 9                | 1                | 0              | 0.011122                | 0.240910  | -0.339985 |
| 10               | 1                | 0              | 0.113022                | -1.798643 | 3.431216  |
| 11               | 1                | 0              | 0.008770                | -1.856039 | 0.948802  |
| 12               | 6                | 0              | 0.154980                | 2.781729  | 0.654390  |
| 13               | 6                | 0              | -0.272891               | 2.800151  | -0.830724 |
| 14               | 6                | 0              | 0.569404                | 3.968493  | 1.227377  |
| 15               | 1                | 0              | 0.974791                | 3.962173  | 2.229646  |
| 16               | 6                | 0              | 0.524560                | 5.201081  | 0.541095  |
| 17               | 6                | 0              | -0.030919               | 5.339012  | -0.804748 |
| 18               | 8                | 0              | 0.987187                | 6.314125  | 1.055483  |

|    |   |   |           |           |           |
|----|---|---|-----------|-----------|-----------|
| 19 | 6 | 0 | 1.626023  | 6.364190  | 2.351868  |
| 20 | 1 | 0 | 2.497493  | 5.704900  | 2.367000  |
| 21 | 1 | 0 | 0.913439  | 6.091615  | 3.134816  |
| 22 | 1 | 0 | 1.934683  | 7.401401  | 2.468509  |
| 23 | 8 | 0 | 0.760822  | 2.105049  | -1.482877 |
| 24 | 8 | 0 | -1.470735 | 2.082943  | -1.040310 |
| 25 | 6 | 0 | -2.660584 | 2.599088  | -0.435377 |
| 26 | 1 | 0 | -2.879444 | 3.620329  | -0.769902 |
| 27 | 1 | 0 | -2.594394 | 2.579468  | 0.659679  |
| 28 | 1 | 0 | -3.465526 | 1.936676  | -0.755605 |
| 29 | 6 | 0 | 0.669012  | 1.960896  | -2.914018 |
| 30 | 1 | 0 | 1.367251  | 1.160811  | -3.162863 |
| 31 | 1 | 0 | 0.979823  | 2.877890  | -3.425765 |
| 32 | 1 | 0 | -0.341692 | 1.676264  | -3.216466 |
| 33 | 6 | 0 | -0.122640 | 6.662834  | -1.476442 |
| 34 | 6 | 0 | -0.377009 | 9.105302  | -2.833307 |
| 35 | 6 | 0 | 0.376380  | 6.809298  | -2.780550 |
| 36 | 6 | 0 | -0.747933 | 7.758074  | -0.857804 |
| 37 | 6 | 0 | -0.877154 | 8.968407  | -1.535887 |
| 38 | 6 | 0 | 0.251367  | 8.024229  | -3.453550 |
| 39 | 1 | 0 | 0.883956  | 5.975979  | -3.259137 |
| 40 | 1 | 0 | -1.150634 | 7.660718  | 0.145782  |
| 41 | 1 | 0 | -1.372265 | 9.805039  | -1.051910 |
| 42 | 1 | 0 | 0.649799  | 8.126533  | -4.458503 |
| 43 | 1 | 0 | -0.474770 | 10.051686 | -3.356757 |
| 44 | 6 | 0 | -0.407982 | 4.192032  | -1.411173 |
| 45 | 1 | 0 | -0.823079 | 4.228068  | -2.413914 |

-----

Zero-point correction= 0.372740  
 (Hartree/Particle)  
 Thermal correction to Energy= 0.394866  
 Thermal correction to Enthalpy= 0.395810  
 Thermal correction to Gibbs Free Energy= 0.320968  
 Sum of electronic and zero-point Energies= -1037.869967  
 Sum of electronic and thermal Energies= -1037.847841  
 Sum of electronic and thermal Enthalpies= -1037.846897  
 Sum of electronic and thermal Free Energies= -1037.921739

### Intermediate C

| Center<br>Number | Atomic<br>Number | Atomic<br>Type | Coordinates (Angstroms) |           |           |
|------------------|------------------|----------------|-------------------------|-----------|-----------|
|                  |                  |                | X                       | Y         | Z         |
| 1                | 1                | 0              | -0.137370               | 2.545193  | 3.291001  |
| 2                | 6                | 0              | -0.026997               | 1.587604  | 2.790558  |
| 3                | 6                | 0              | 0.131952                | -0.888993 | 1.539308  |
| 4                | 6                | 0              | -0.074150               | 0.422239  | 3.550277  |
| 5                | 6                | 0              | 0.116237                | 1.547413  | 1.384478  |
| 6                | 6                | 0              | 0.182483                | 0.273928  | 0.775212  |
| 7                | 6                | 0              | 0.008050                | -0.826549 | 2.929556  |
| 8                | 1                | 0              | -0.190558               | 0.489570  | 4.629089  |
| 9                | 1                | 0              | 0.294188                | 0.212810  | -0.298659 |
| 10               | 1                | 0              | -0.032332               | -1.737685 | 3.520493  |
| 11               | 1                | 0              | 0.194798                | -1.854213 | 1.043036  |
| 12               | 6                | 0              | 0.185335                | 2.793603  | 0.606858  |
| 13               | 6                | 0              | -0.220016               | 2.805919  | -0.862485 |
| 14               | 6                | 0              | 0.639940                | 3.972367  | 1.183341  |

|    |   |   |           |           |           |
|----|---|---|-----------|-----------|-----------|
| 15 | 1 | 0 | 1.044706  | 3.924750  | 2.187233  |
| 16 | 6 | 0 | 0.616163  | 5.211293  | 0.527827  |
| 17 | 6 | 0 | 0.030832  | 5.338847  | -0.786323 |
| 18 | 8 | 0 | 1.125383  | 6.355133  | 1.059197  |
| 19 | 6 | 0 | 1.771399  | 6.305158  | 2.322771  |
| 20 | 1 | 0 | 2.620908  | 5.611118  | 2.309317  |
| 21 | 1 | 0 | 1.076006  | 6.011901  | 3.119803  |
| 22 | 1 | 0 | 2.130775  | 7.318207  | 2.511387  |
| 23 | 8 | 0 | 0.813417  | 2.105112  | -1.555232 |
| 24 | 8 | 0 | -1.407494 | 2.041416  | -1.109006 |
| 25 | 6 | 0 | -2.587917 | 2.507114  | -0.475189 |
| 26 | 1 | 0 | -2.834858 | 3.537350  | -0.767045 |
| 27 | 1 | 0 | -2.507607 | 2.460855  | 0.619154  |
| 28 | 1 | 0 | -3.390673 | 1.840693  | -0.801153 |
| 29 | 6 | 0 | 0.682375  | 1.998830  | -2.970714 |
| 30 | 1 | 0 | 1.448648  | 1.286144  | -3.285782 |
| 31 | 1 | 0 | 0.869059  | 2.958400  | -3.471117 |
| 32 | 1 | 0 | -0.305033 | 1.622811  | -3.257746 |
| 33 | 6 | 0 | -0.120210 | 6.663054  | -1.452915 |
| 34 | 6 | 0 | -0.494941 | 9.115280  | -2.790847 |
| 35 | 6 | 0 | 0.241193  | 6.811810  | -2.801711 |
| 36 | 6 | 0 | -0.666580 | 7.771362  | -0.783732 |
| 37 | 6 | 0 | -0.854584 | 8.982601  | -1.447425 |
| 38 | 6 | 0 | 0.055452  | 8.024844  | -3.465632 |
| 39 | 1 | 0 | 0.688107  | 5.971167  | -3.325088 |
| 40 | 1 | 0 | -0.950970 | 7.678635  | 0.258943  |
| 41 | 1 | 0 | -1.286215 | 9.825666  | -0.914009 |
| 42 | 1 | 0 | 0.347887  | 8.118397  | -4.508303 |
| 43 | 1 | 0 | -0.638927 | 10.061856 | -3.305027 |
| 44 | 6 | 0 | -0.393119 | 4.201916  | -1.406512 |
| 45 | 1 | 0 | -0.884631 | 4.269771  | -2.372264 |

---

|                                              |              |
|----------------------------------------------|--------------|
| Zero-point correction=                       | 0.370260     |
| (Hartree/Particle)                           |              |
| Thermal correction to Energy=                | 0.392314     |
| Thermal correction to Enthalpy=              | 0.393258     |
| Thermal correction to Gibbs Free Energy=     | 0.318035     |
| Sum of electronic and zero-point Energies=   | -1038.078649 |
| Sum of electronic and thermal Energies=      | -1038.056595 |
| Sum of electronic and thermal Enthalpies=    | -1038.055651 |
| Sum of electronic and thermal Free Energies= | -1038.130875 |

**X-ray Structure Determinations.** Crystals of **1**, **1a**, **2a**, **3a**, **5** and **5a** were grown from ethyl acetate (**1**, **1a**), diethyl ether (**2a**), toluene (**3a**), dichloromethane (**5**) and isopropanol (**5a**) saturated solutions under slow evaporation at room temperature. Measured crystals were prepared under inert conditions immersed in perfluoropolyether as protecting oil for manipulation. Suitable crystals were mounted on MiTeGen Micromounts<sup>TM</sup> and these samples were used for data collection. Data were collected with Bruker X8 Proteum (**1**, **1a**, **5**), Bruker SMART CCD 1000 (**2**) diffractometers, whereas those of **2a**, **3a** and **5a** were collected at the ESRF synchrotron BM16 beamline (Grenoble, France). The data were processed with SAINT (**2**),<sup>13</sup> APEX2 (**1**, **1a**, **5**),<sup>14</sup> and HKL2000 programs (**2a**, **3a**, **5a**).<sup>15</sup> The structures were solved by direct methods,<sup>16</sup> which revealed the position of all non-hydrogen atoms. These atoms were refined on  $F^2$  by a full-matrix least-squares procedure using anisotropic displacement parameters.<sup>17</sup> All hydrogen atoms were located in difference Fourier maps and included as fixed contributions riding on attached atoms with isotropic thermal displacement parameters 1.2 times those of the respective atom. Crystal data for **1**:  $C_{20}H_{18}O_2$ ,  $M = 290.34$ , Monoclinic,  $P2_1/n$ ,  $a = 5.8194(3)^\circ$ ,  $b = 18.0195(8)$ ,  $c = 7.6388(3)$ ,  $\beta = 100.028(2)^\circ$ ,  $V = 788.79(6)$ ,  $Z = 2$ , measured reflections = 6521, independent = 1275, parameters = 101,  $R_1 = 0.0479$ ,  $wR_2 = 0.1258$ ,  $S = 1.029$ . Crystal data for **1a**:  $C_{22}H_{24}O_4$ ,  $M = 352.41$ , Monoclinic,  $P2_1/n$ ,  $a = 6.4349(7)^\circ$ ,  $b = 17.3703(19)$ ,  $c = 8.4716(9)$ ,  $\beta = 110.133(3)^\circ$ ,  $V = 889.06(17)$ ,  $Z = 2$ , measured reflections = 8382, independent = 1463, parameters = 120,  $R_1 = 0.0404$ ,  $wR_2 = 0.0983$ ,  $S = 1.066$ . Crystal data for **2a**:  $C_{26}H_{24}O_4$ ,  $M = 400.45$ , Triclinic,  $P-1$ ,  $a = 10.786(2)^\circ$ ,  $b = 12.3380(18)$ ,  $c = 16.619(3)$ ,  $\alpha = 87.87(2)$ ,  $\beta = 80.36(3)$ ,  $\gamma = 86.62(3)$ ,  $V = 2175(6)$ ,  $Z = 4$ , measured reflections = 41742, independent = 7243, parameters = 549,  $R_1 = 0.0506$ ,  $wR_2 = 0.1421$ ,  $S = 1.011$ . Crystal data for **3a**:  $C_{22}H_{20}O_4$ ,  $M = 348.38$ , Monoclinic,  $P2_1/n$ ,  $a = 10.222(2)^\circ$ ,  $b = 7.6590(15)$ ,  $c = 22.493(5)$ ,  $\beta = 102.11(3)^\circ$ ,  $V = 1721.8(6)$ ,  $Z = 4$ , measured reflections = 11346, independent = 2986, parameters = 236,  $R_1 = 0.0748$ ,  $wR_2 = 0.2534$ ,  $S = 1.152$ . Crystal data for **5**:  $C_{22}H_{16}F_6O_2S_2$ ,  $M = 490.47$ , Triclinic,  $P-1$ ,  $a = 6.9878(7)^\circ$ ,  $b = 8.8208(9)$ ,  $c = 10.2906(11)$ ,  $\alpha = 93.730(5)$ ,  $\beta = 109.110(6)^\circ$ ,  $\gamma = 112.219(5)$ ,  $V = 541.74(10)$ ,  $Z = 1$ , measured reflections = 6834, independent = 1771, parameters = 146,  $R_1 = 0.0595$ ,  $wR_2 = 0.1647$ ,  $S = 1.094$ . Crystal for **5a**:  $C_{24}H_{22}F_6O_4S_2$ ,  $M = 552.54$ , Monoclinic,  $P2_1/n$ ,  $a = 13.639(3)^\circ$ ,  $b = 6.3760(13)$ ,  $c = 27.642(6)$ ,  $\beta = 94.69(3)^\circ$ ,  $V = 2395.8(8)$ ,  $Z = 4$ , measured reflections = 40748, independent = 3963, parameters = 329,  $R_1 = 0.0527$ ,  $wR_2 = 0.1473$ ,  $S = 1.092$ . Crystallographic data (excluding structure factors) for the structures of compounds **1**, **1a**, **2a**, **3a**, **5**, and **5a** reported in this paper have been deposited with the Cambridge Crystallographic Data Center as supplementary publication no. CCDC-750177 (**1**), 750178 (**1a**), 750180 (**2a**), 750181 (**3a**), 750182 (**5**), and 750183 (**5a**). Copies of the data can be obtained free of charge at <http://www.ccdc.cam.ac.uk/products/csd/request/>.

<sup>13</sup> Bruker, SMART and SAINT. Area Detector Control Integration Software, Bruker Analytical X-ray Instruments, Inc., Madison, Wisconsin (1999).

<sup>14</sup> Bruker, APEX2 Software, Bruker AXS Inc. V2009, Madison, Wisconsin, USA (2009).

<sup>15</sup> Z. Otwinowski and W. Minor, Methods in Enzymology, Volume 276: Macromolecular Crystallography, part A, 307-326, 1997, C.W. Carter, Jr. & R. M. Sweet, Eds., Academic Press (New York).

<sup>16</sup> Sheldrick, G. M. *Acta Crystallogr.* **1990**, *46A*, 467.

<sup>17</sup> G. M. Sheldrick. SHELXL-97, Program for the Refinement of Crystal Structures, University of Göttingen, Germany (1997).

**Copies of  $^1\text{H}$  and  $^{13}\text{C}$  NMR spectra of new compounds.**

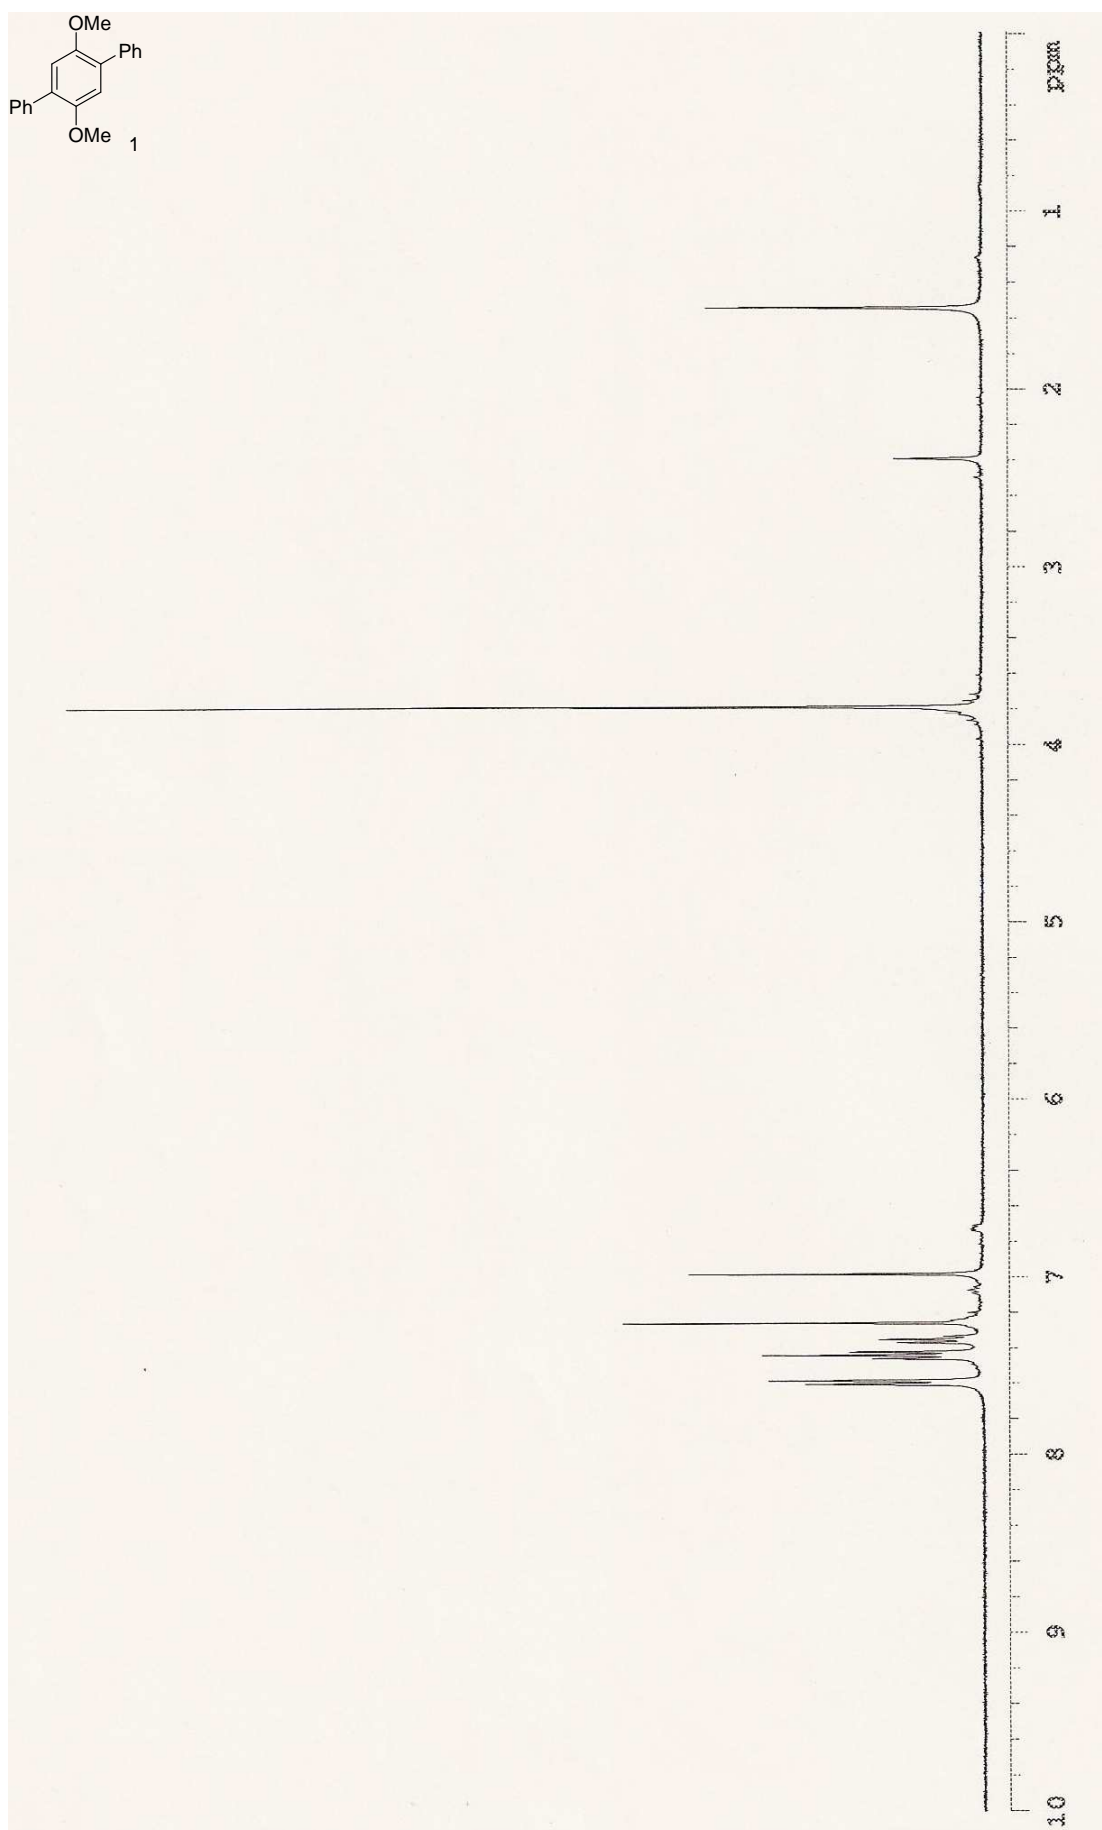

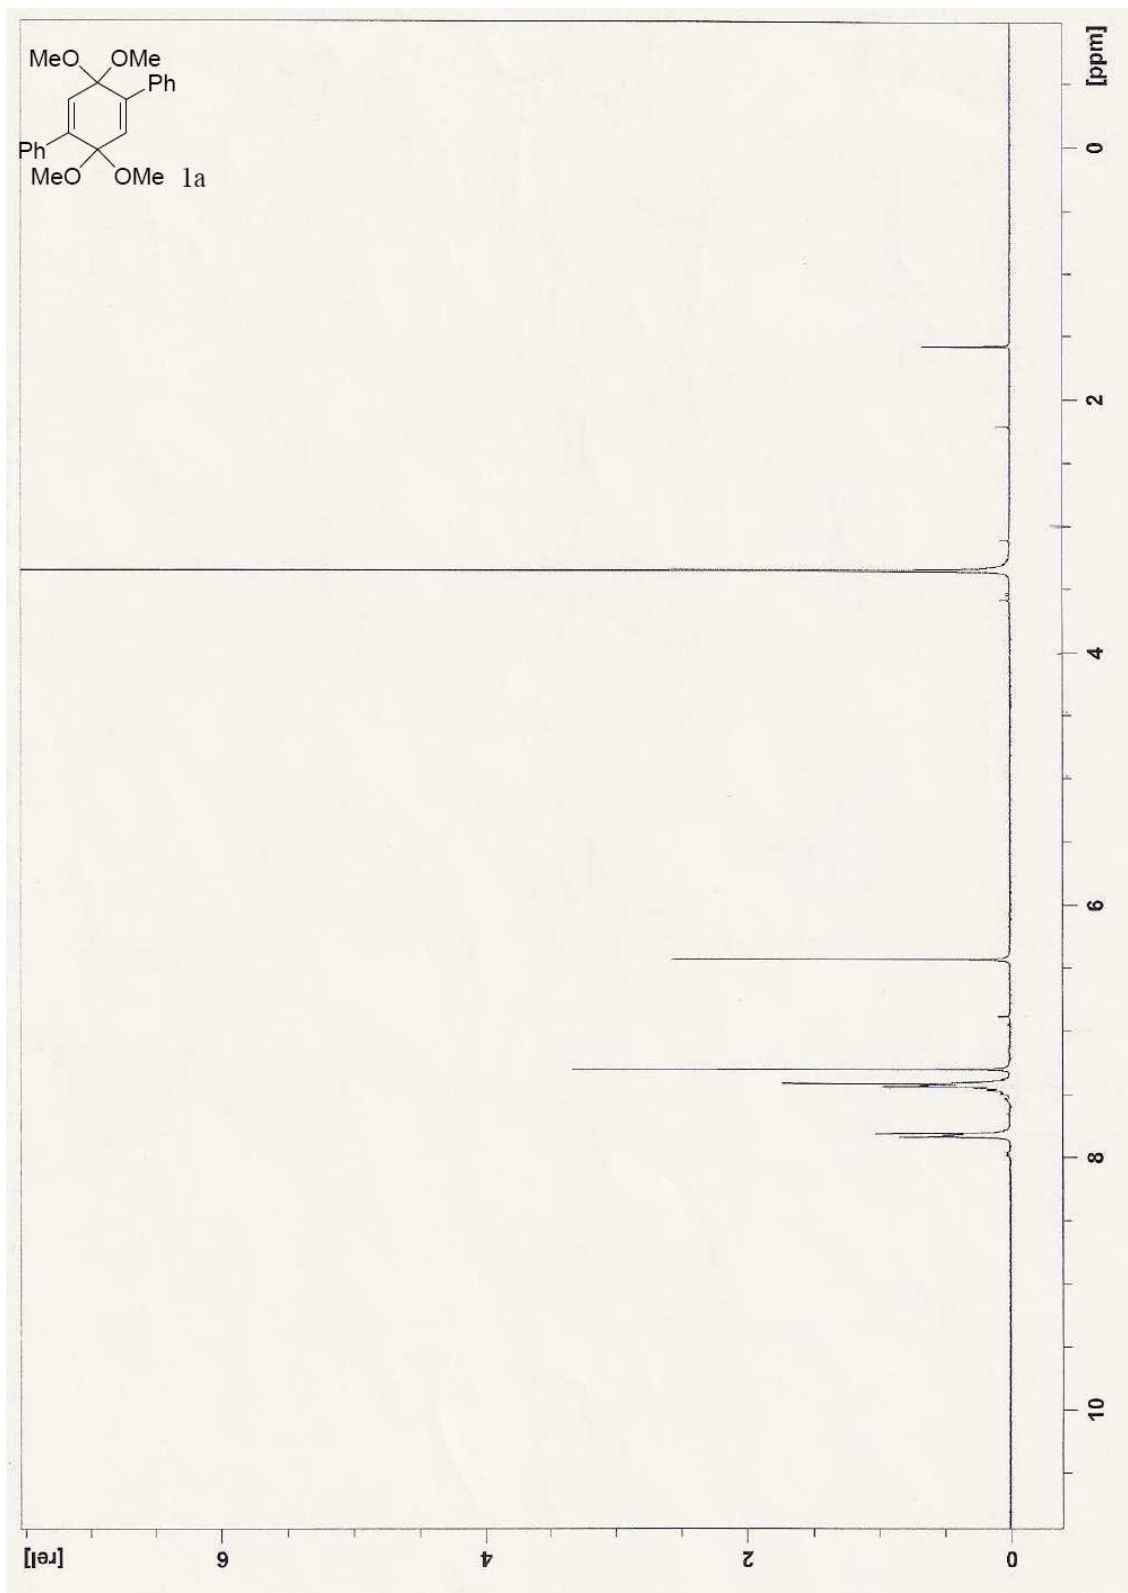



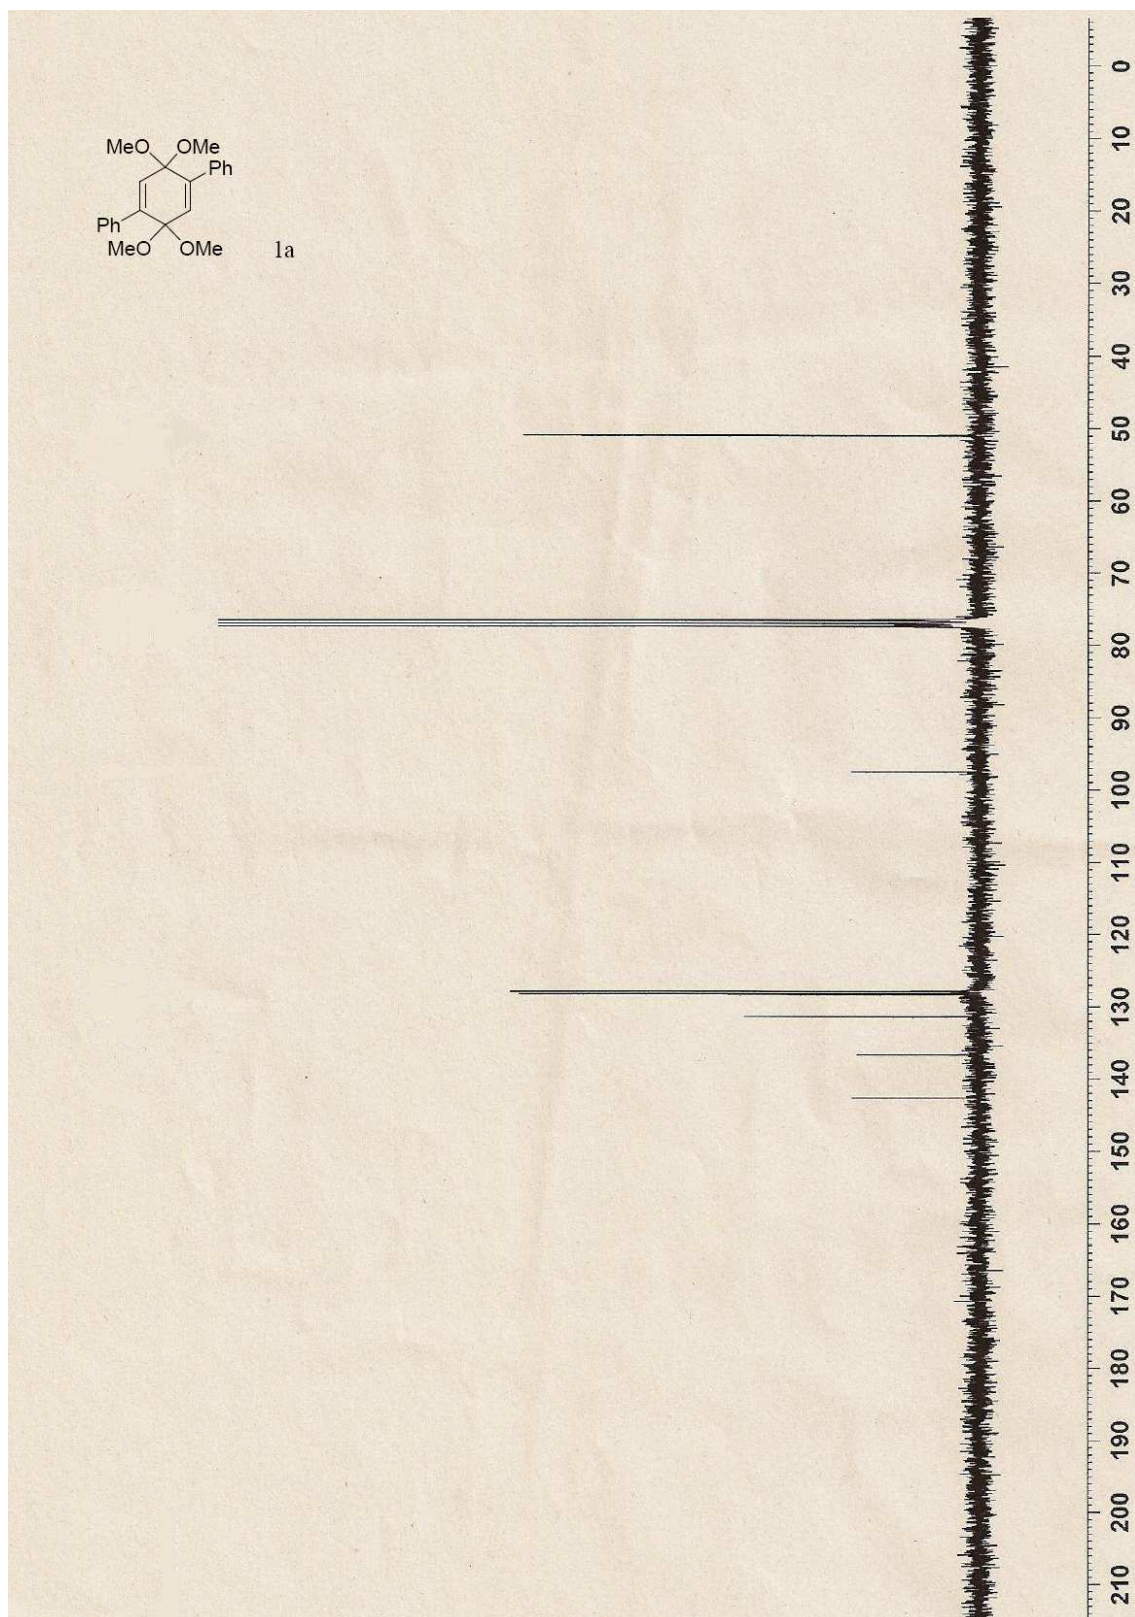

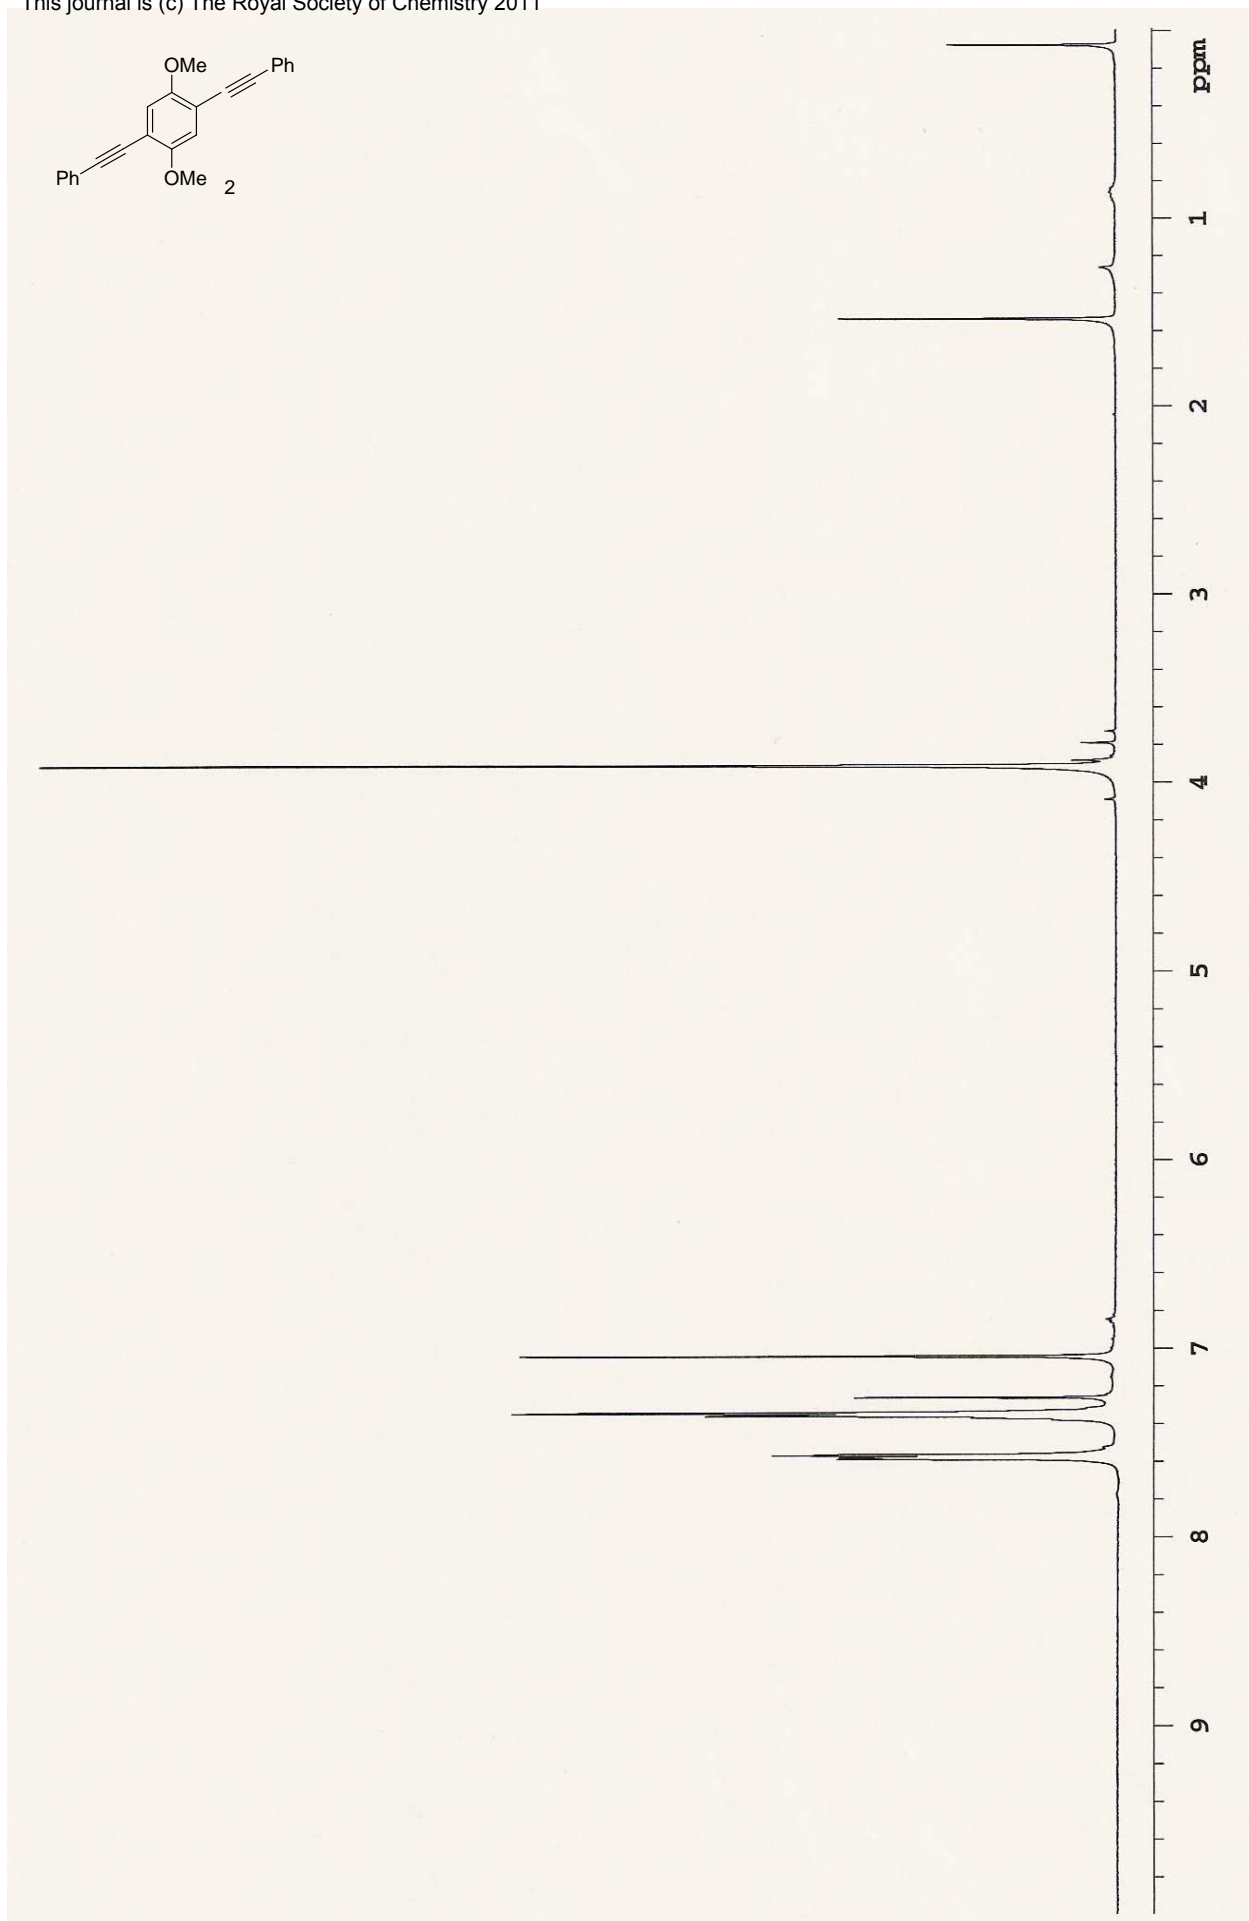

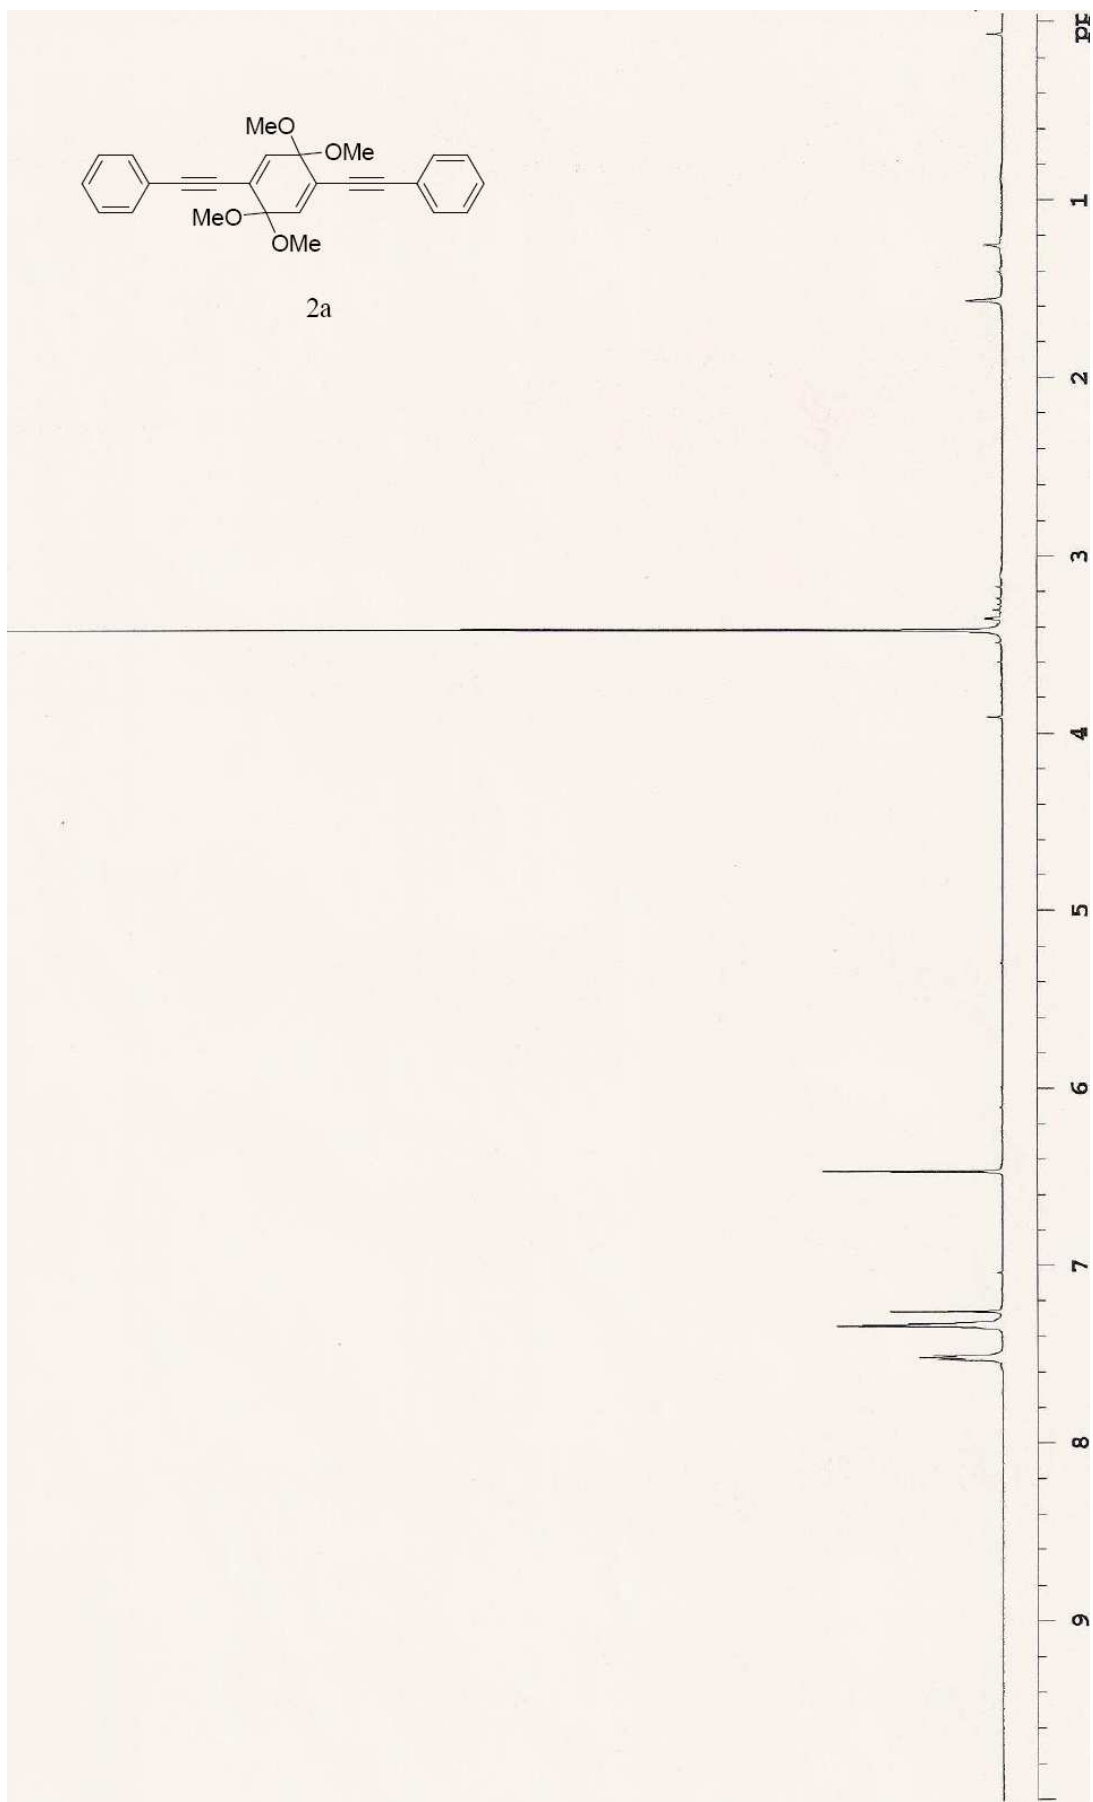

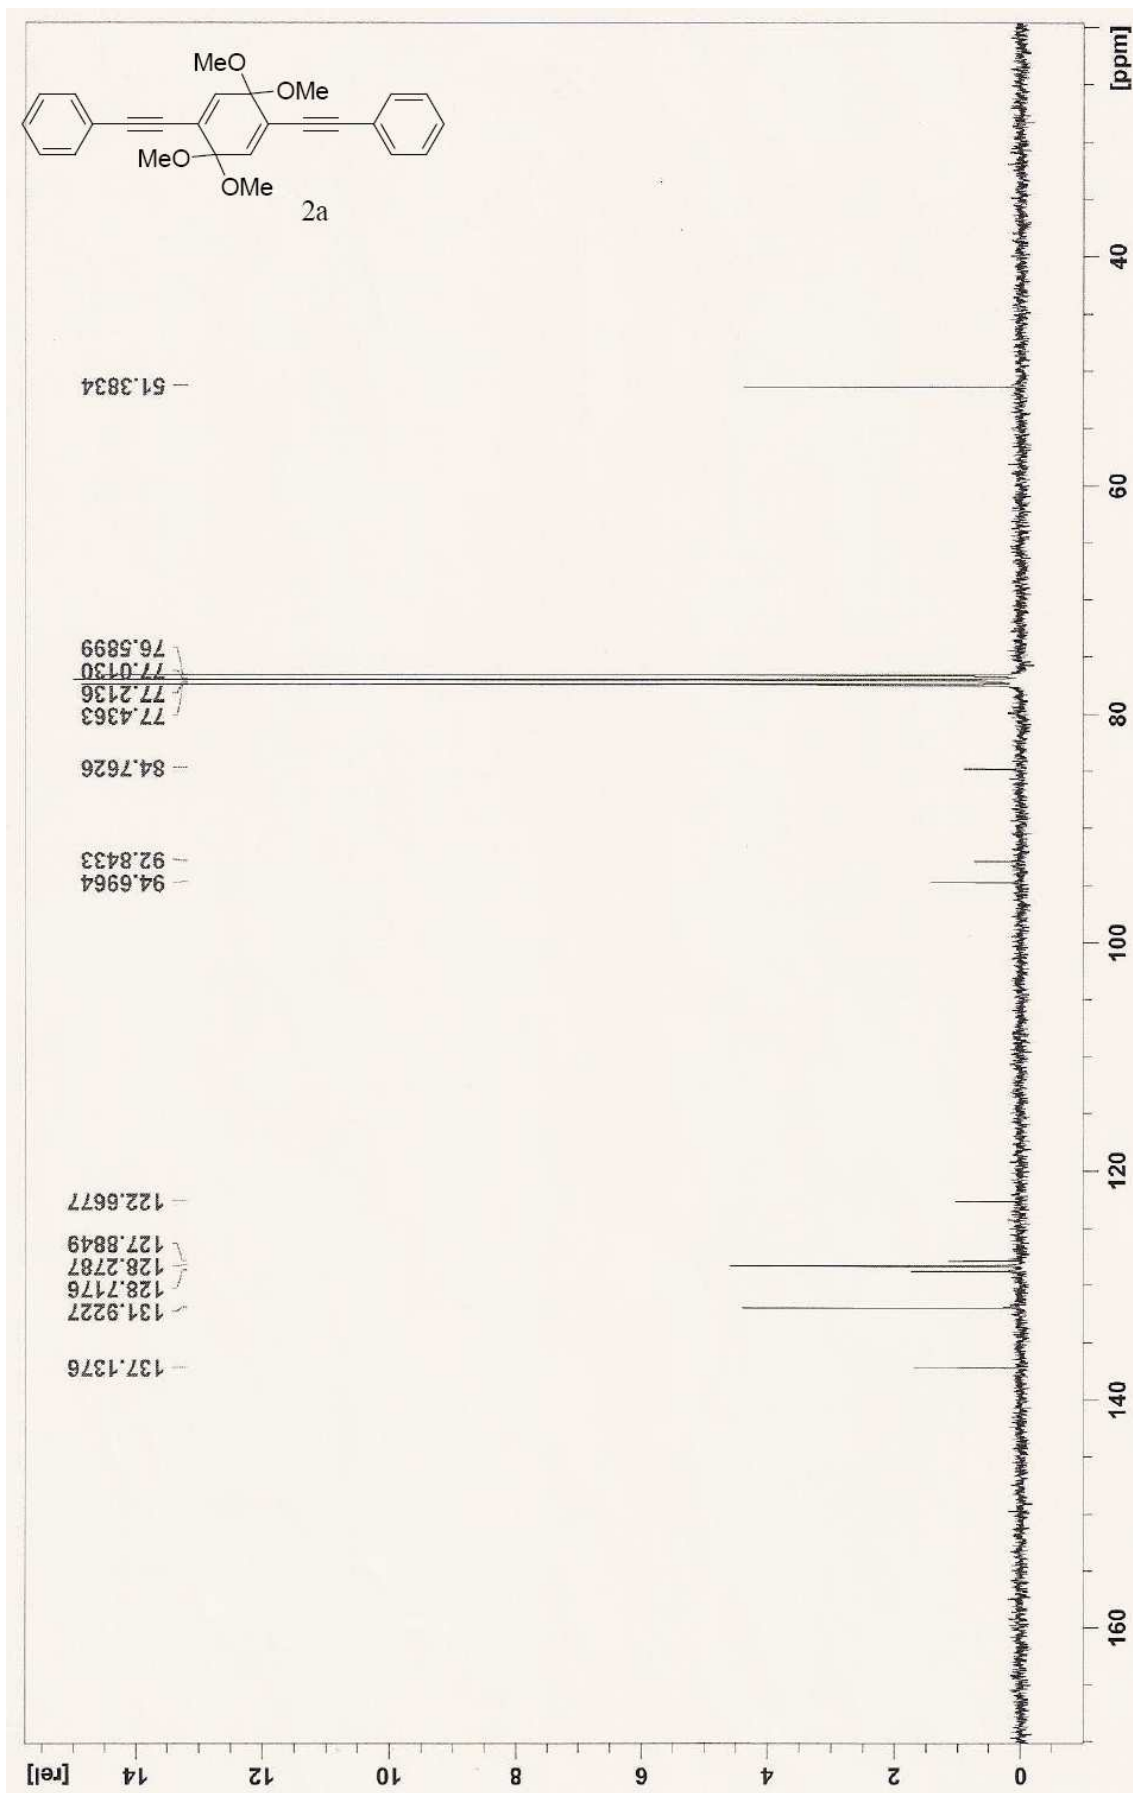

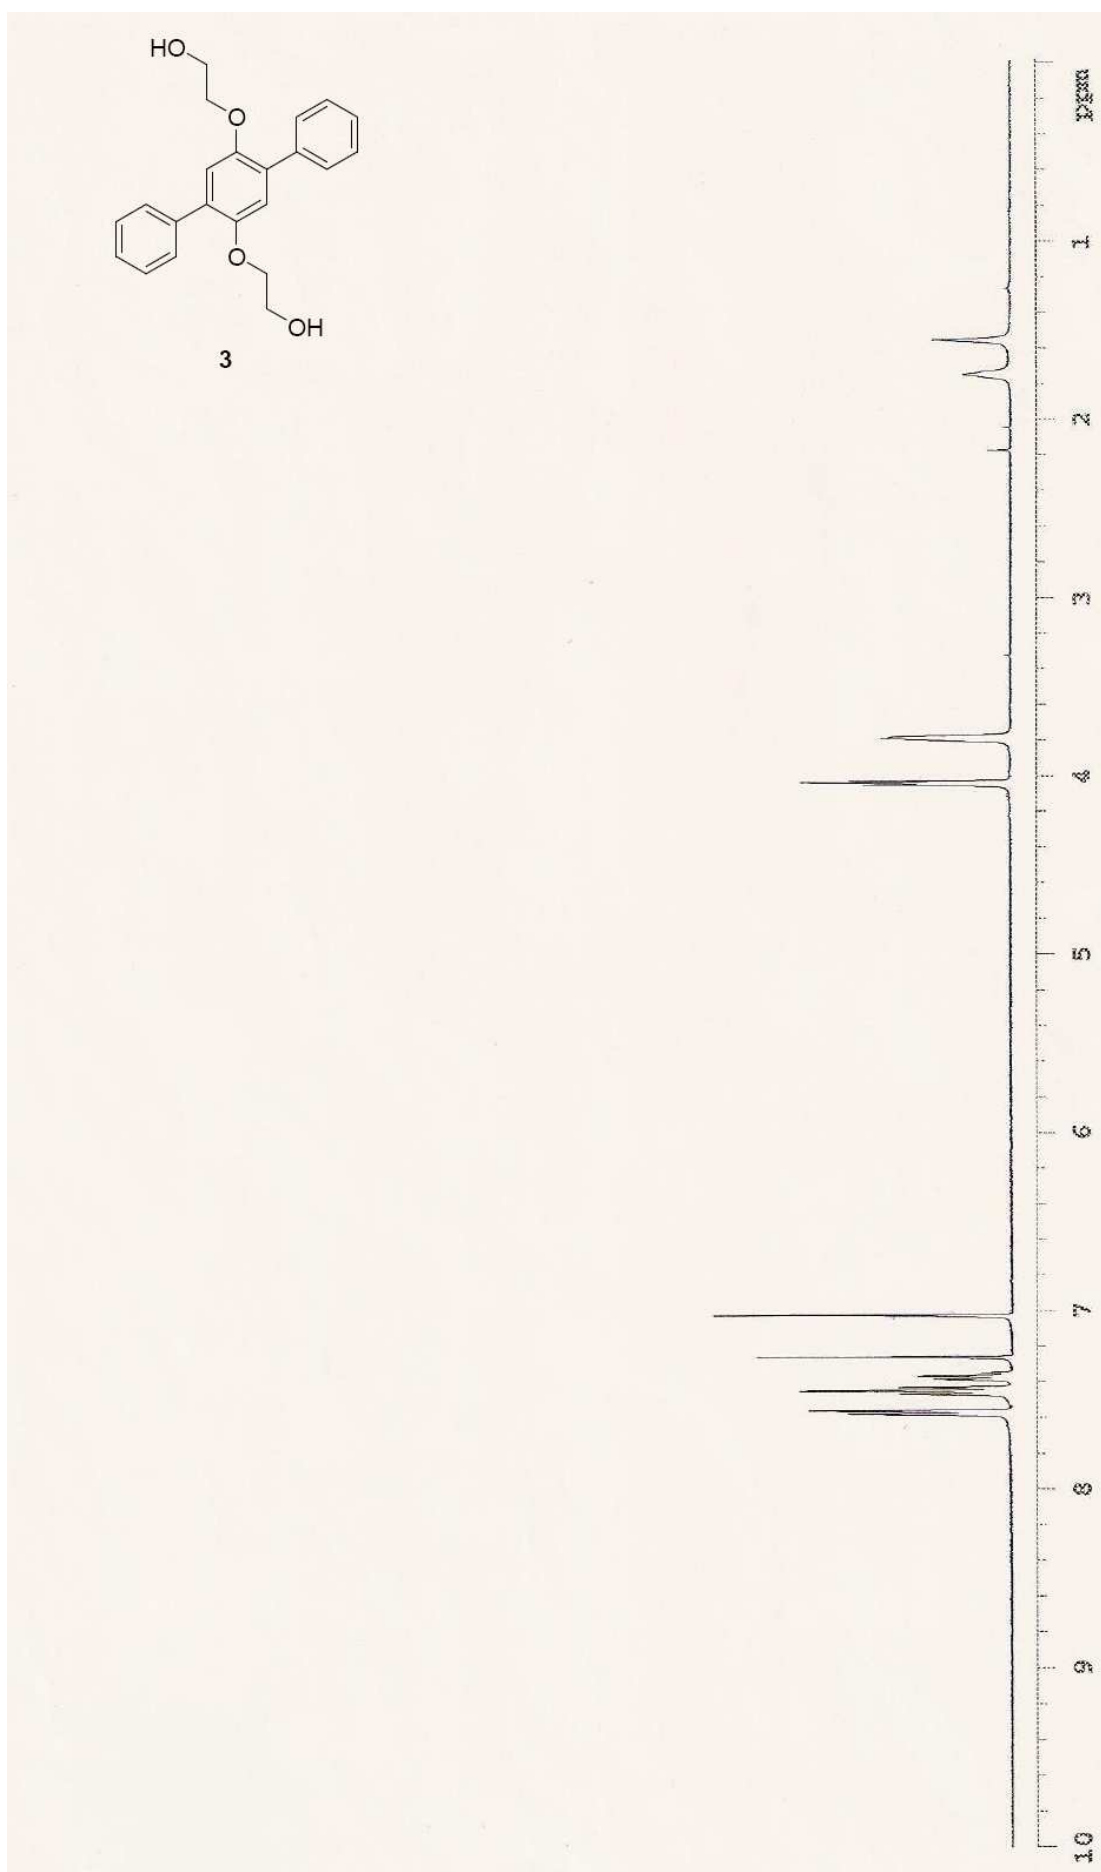

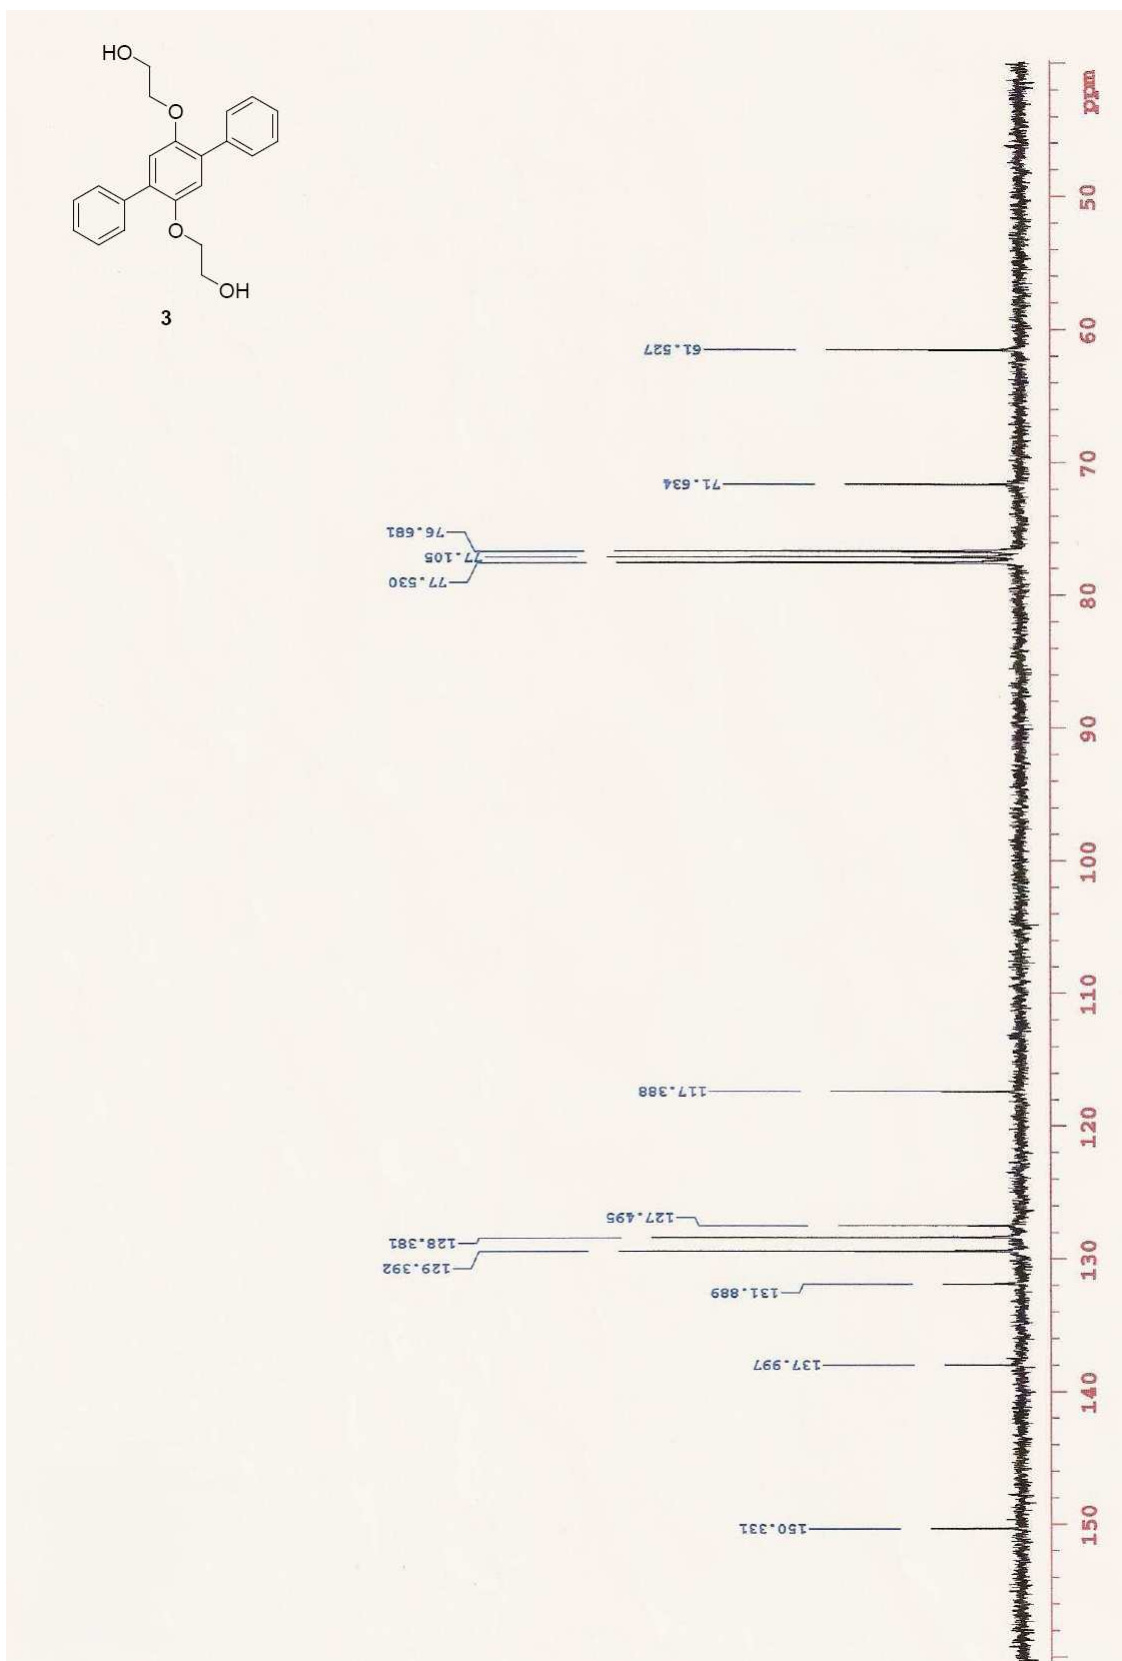

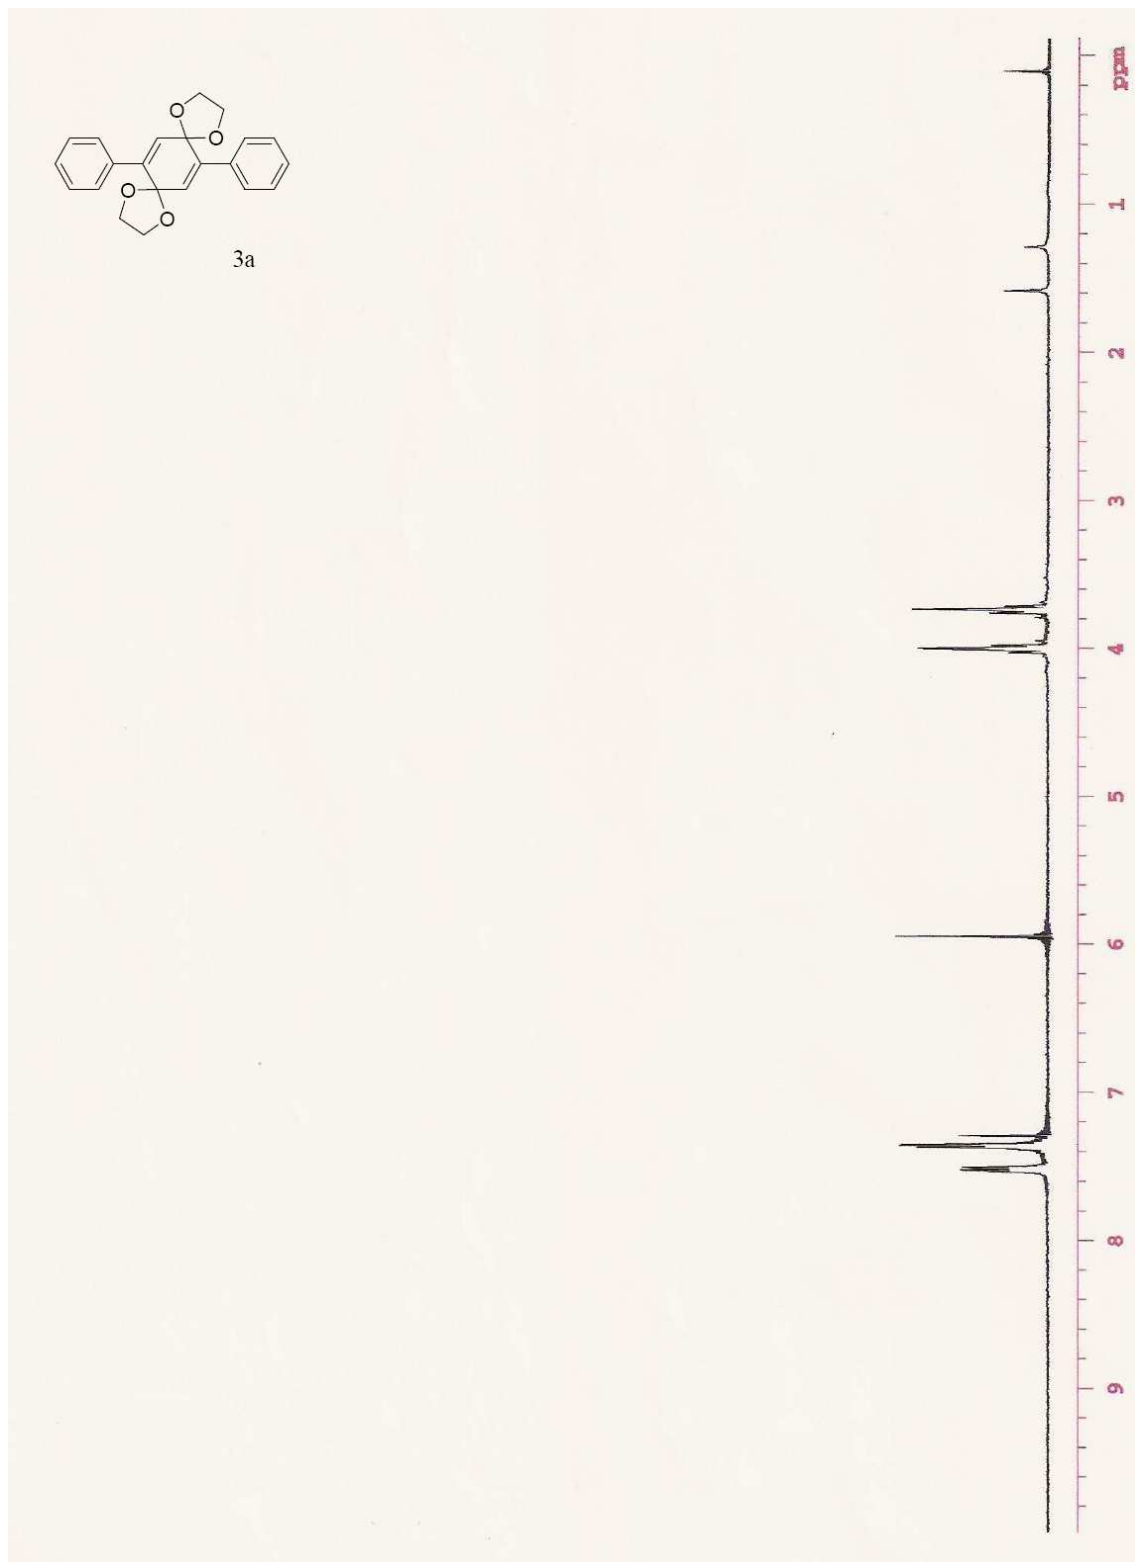



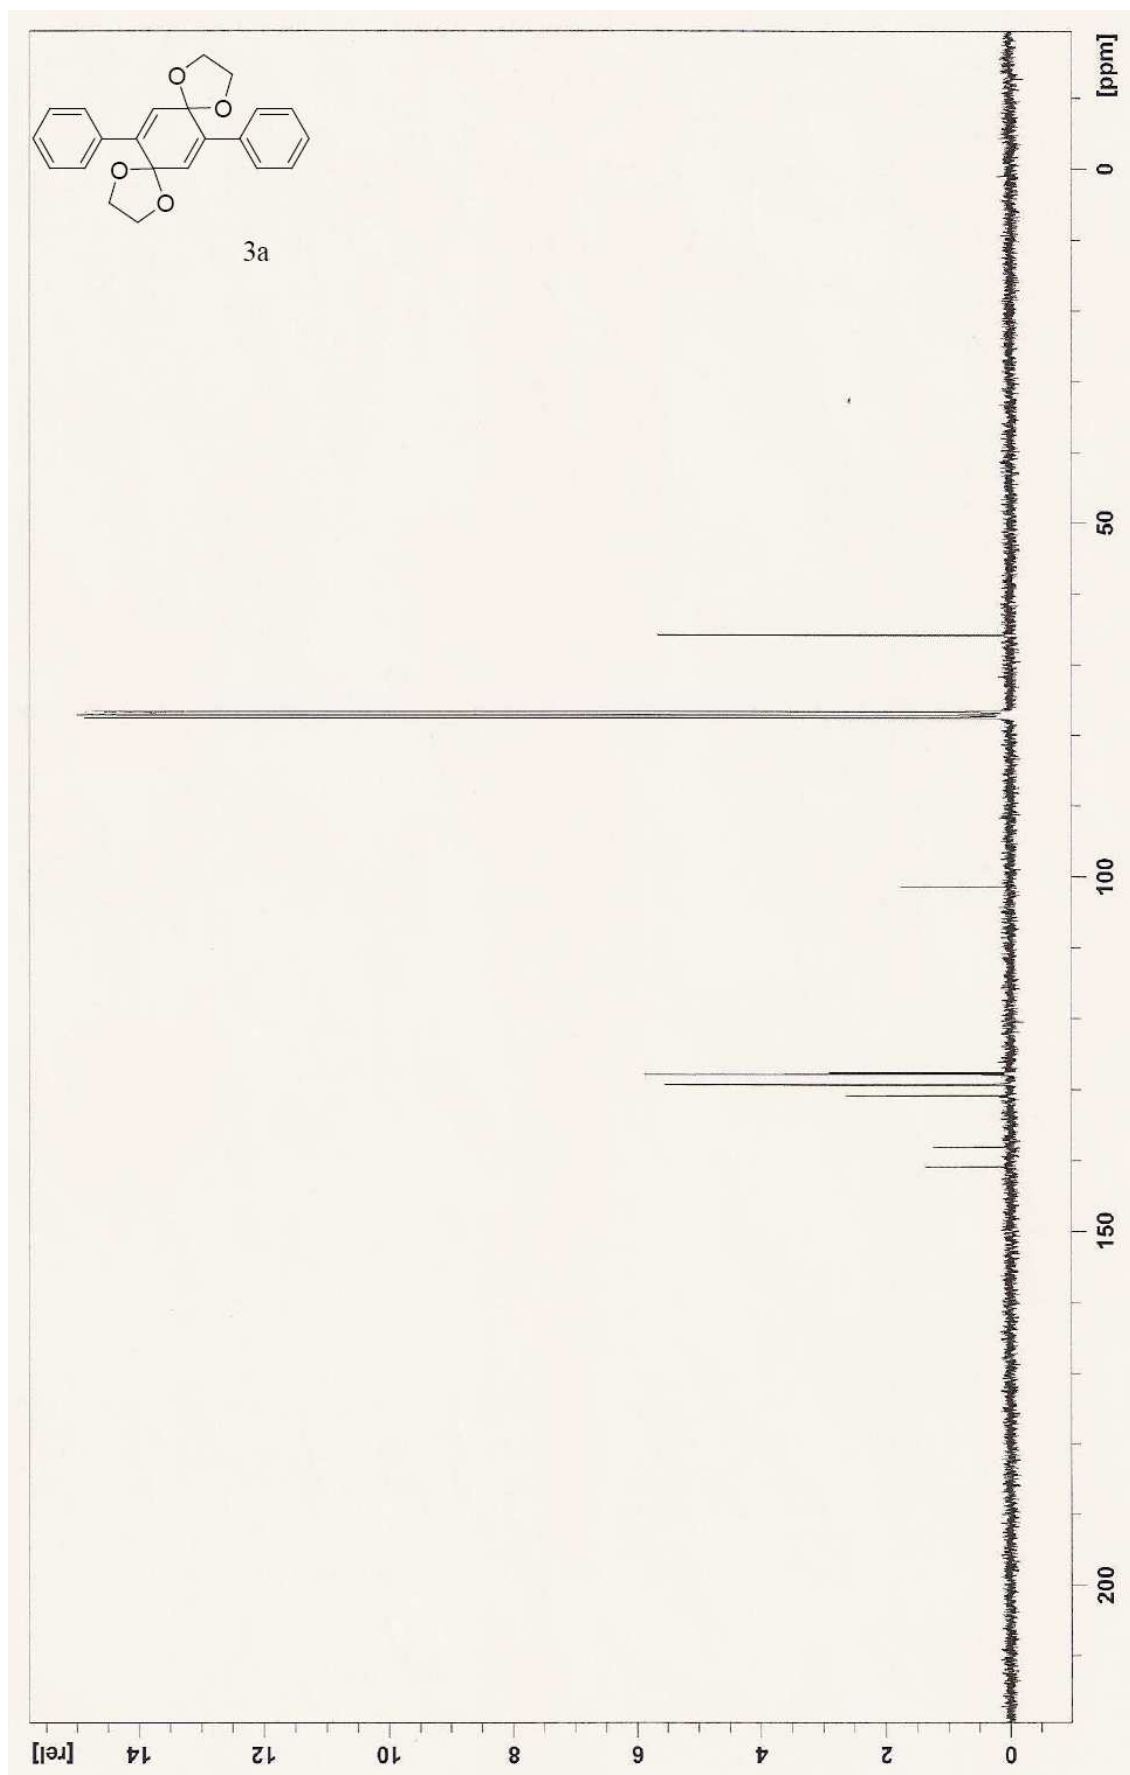





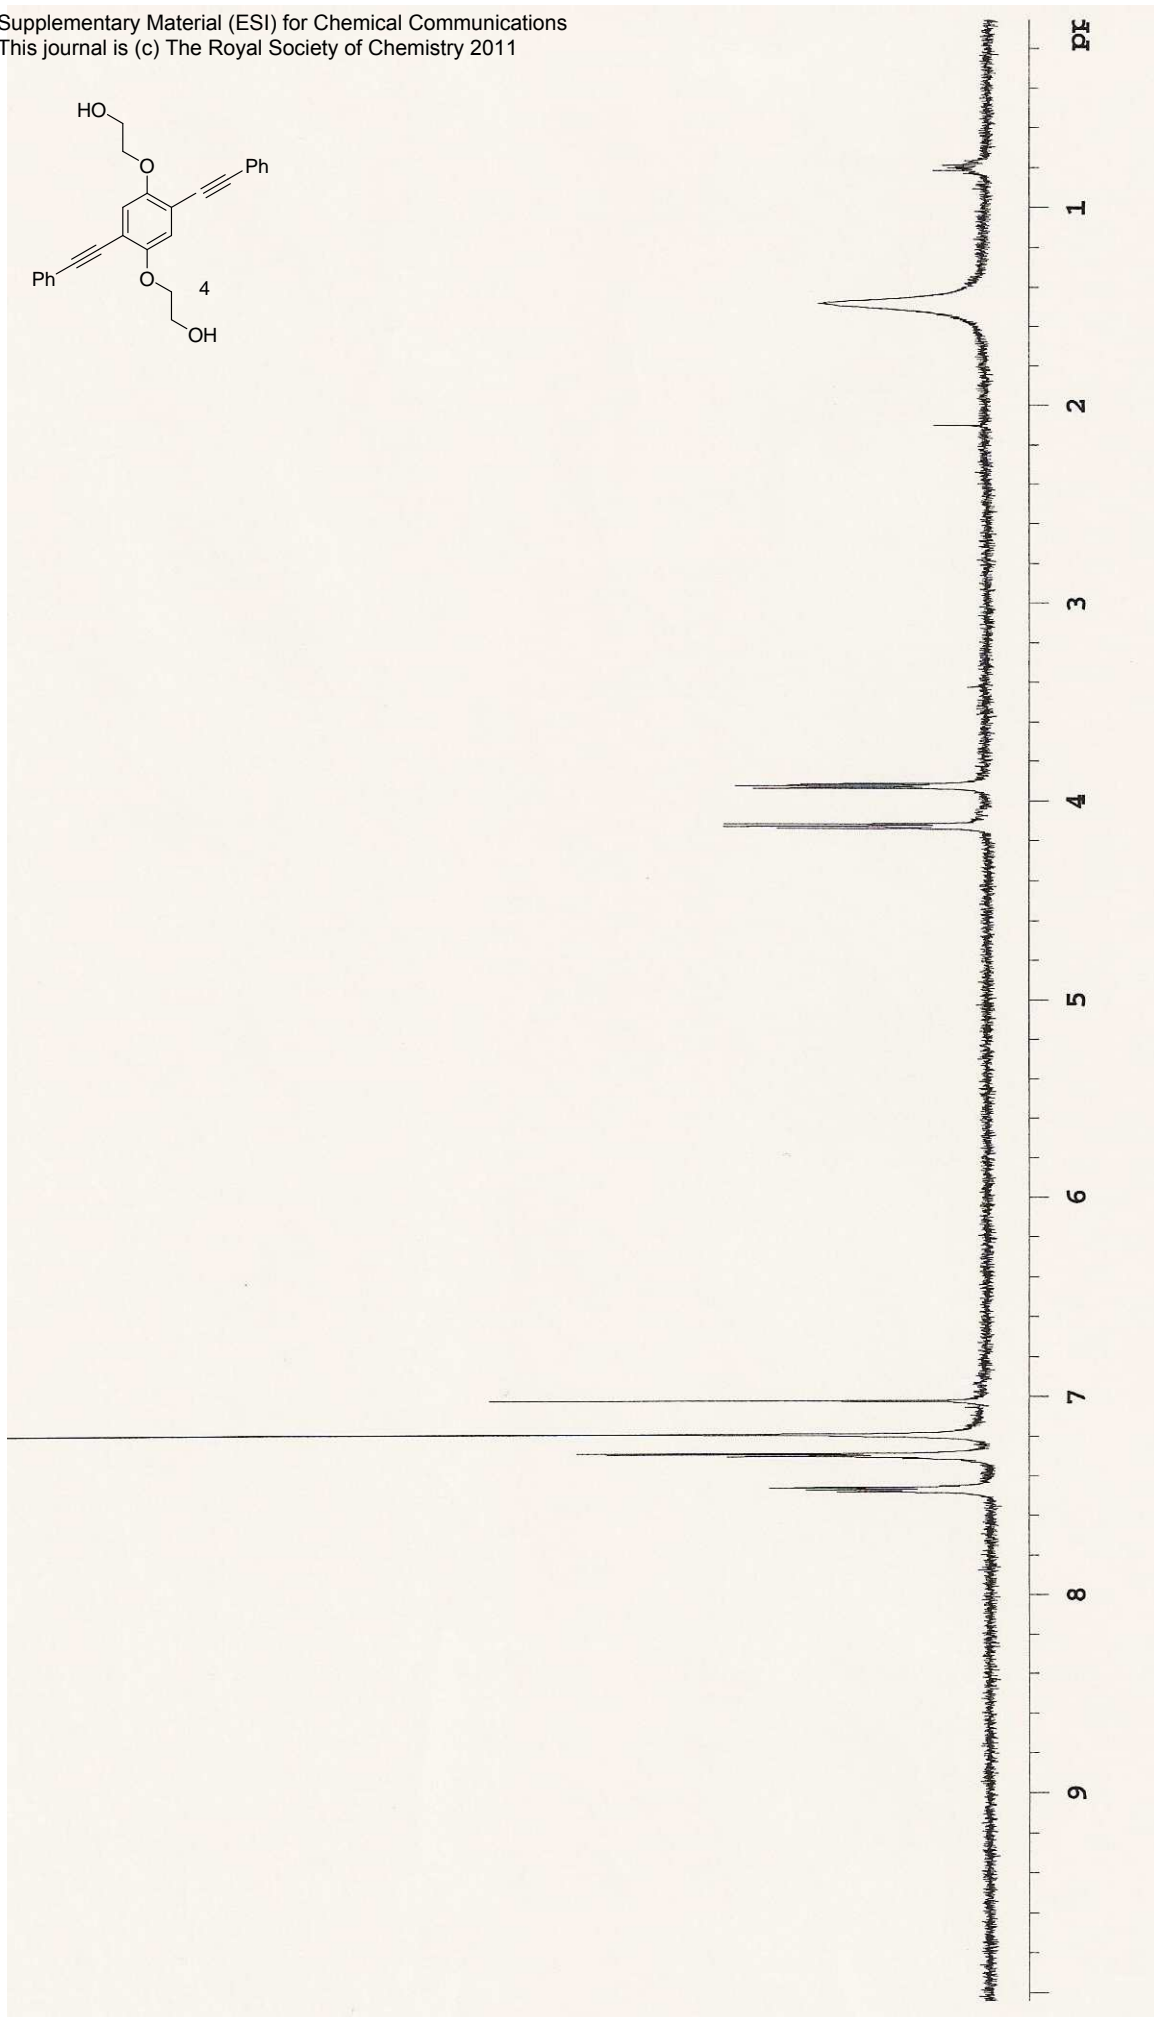

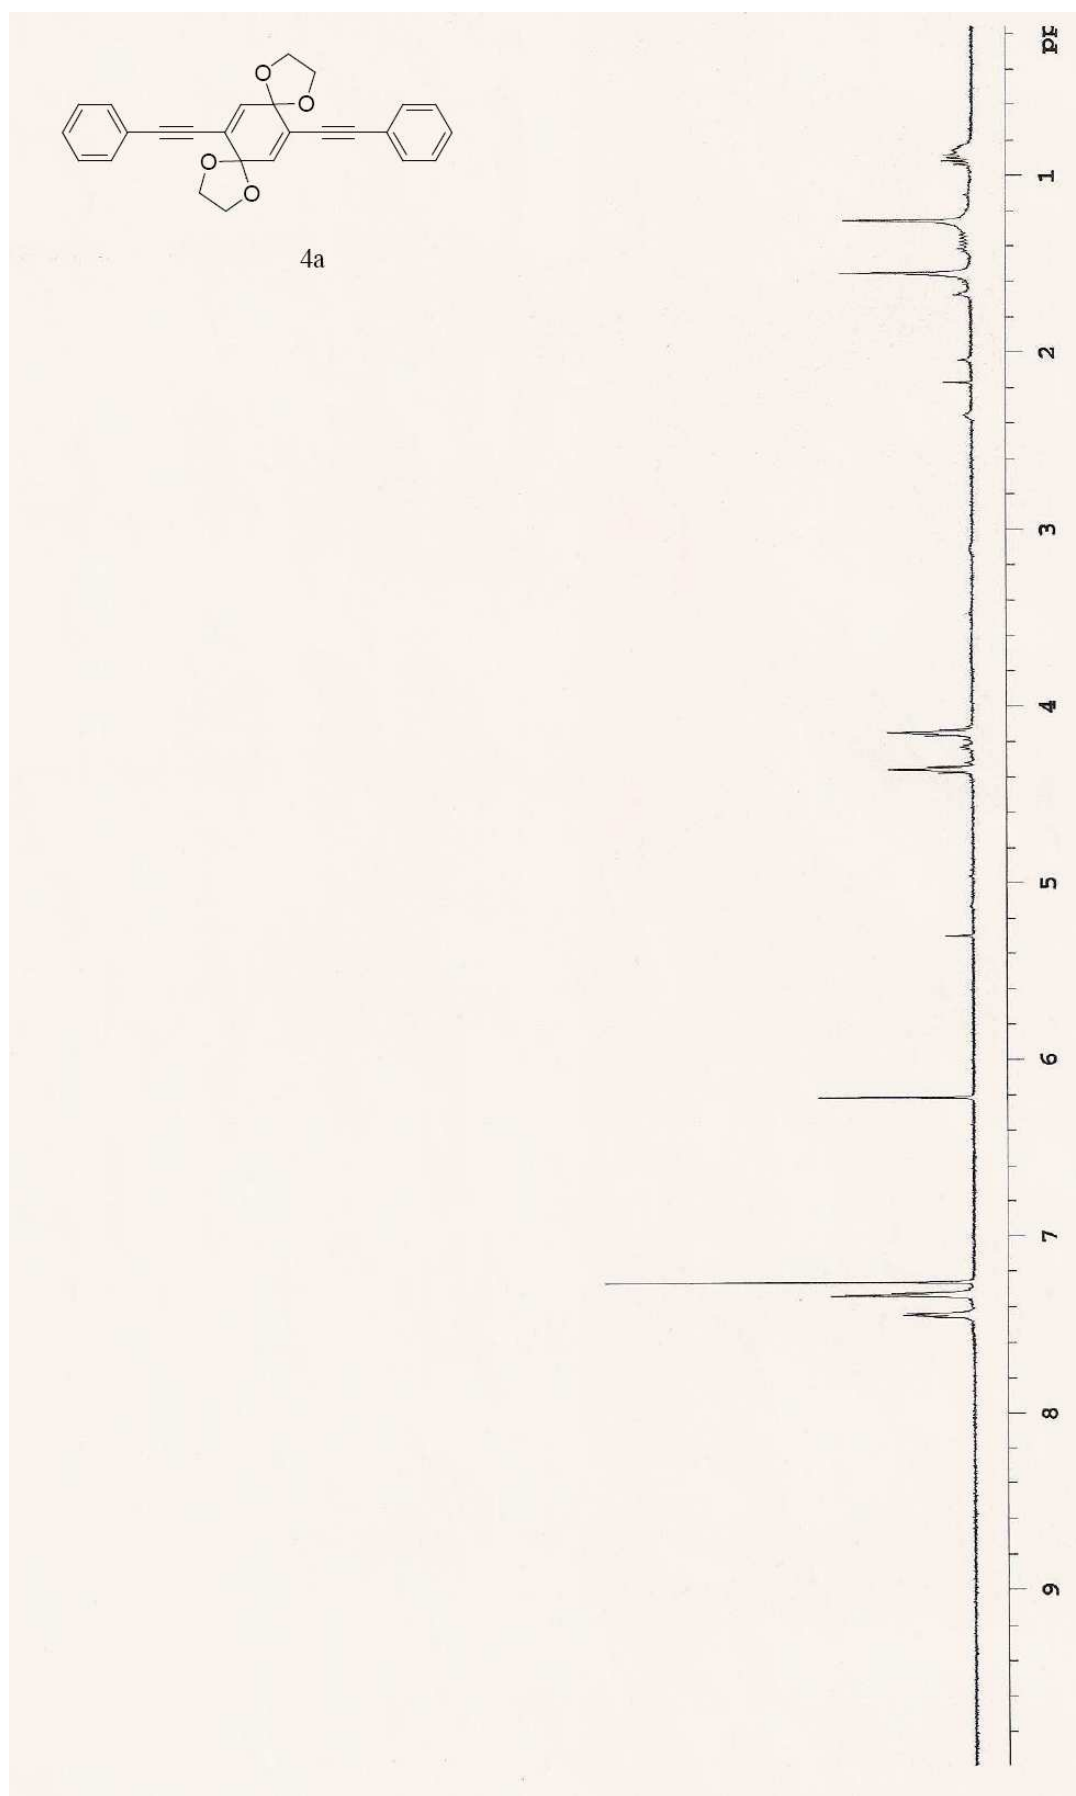

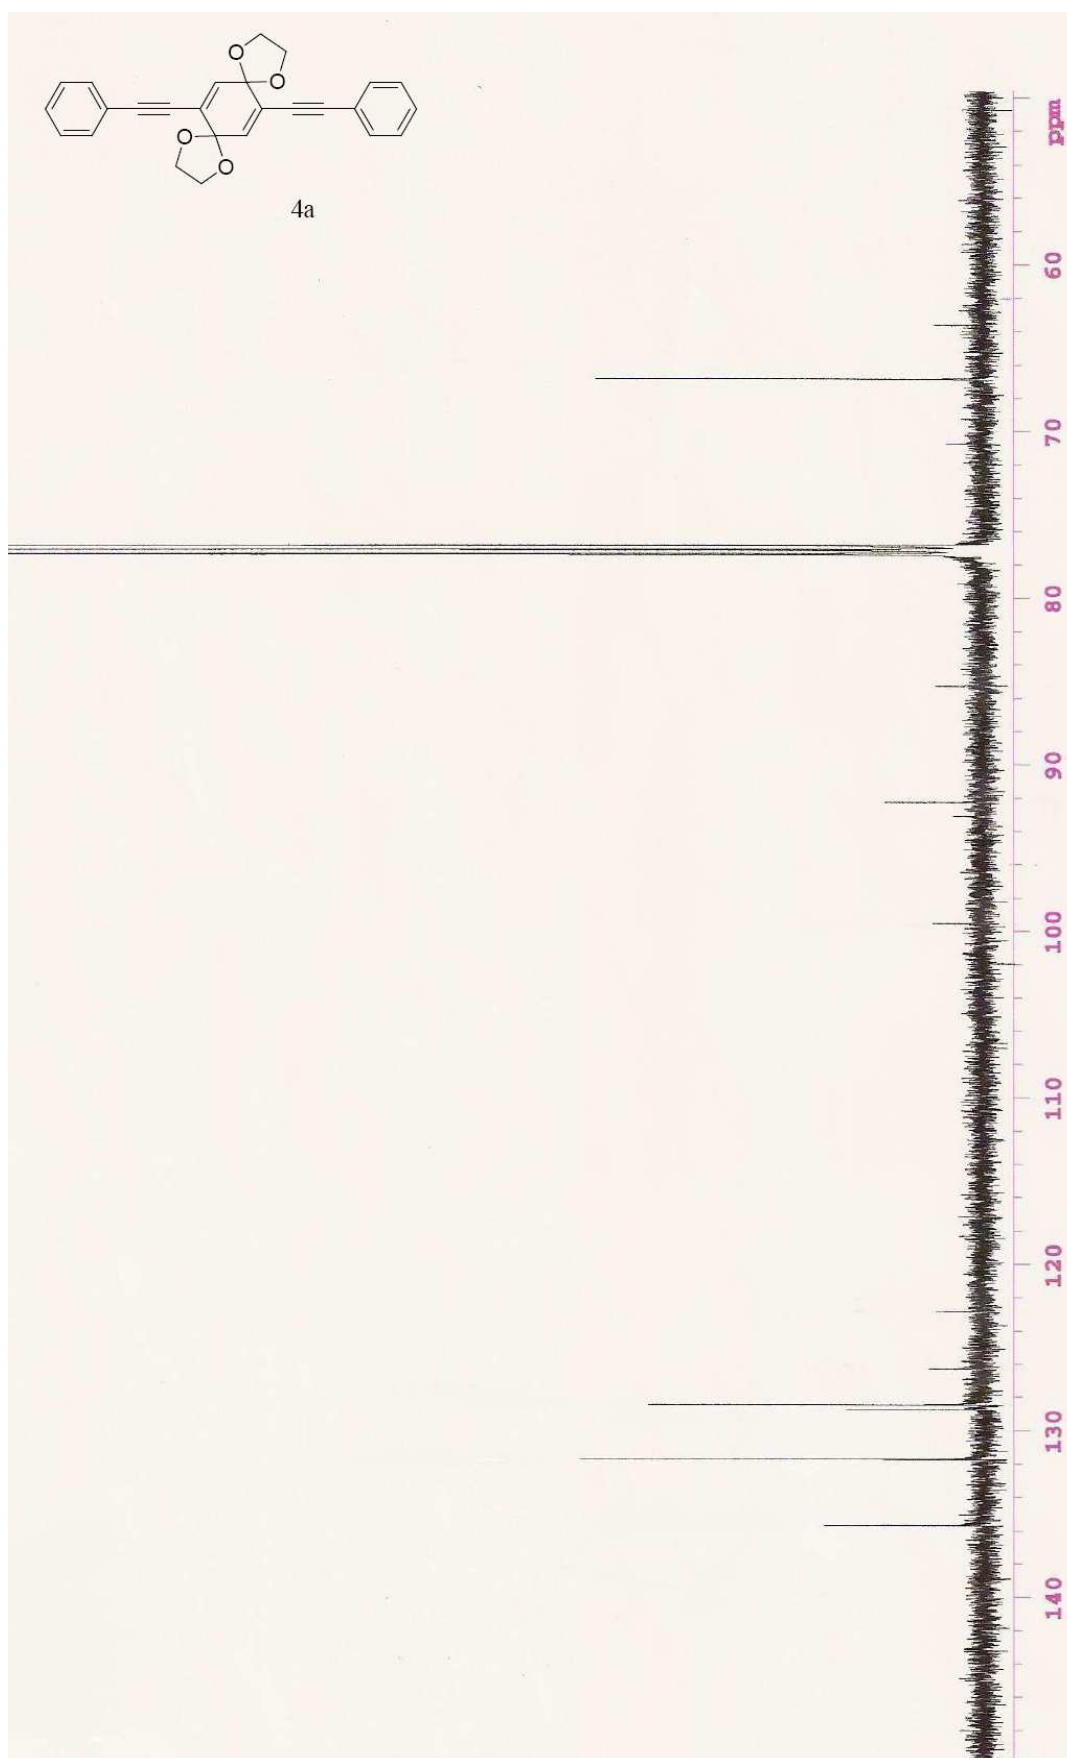

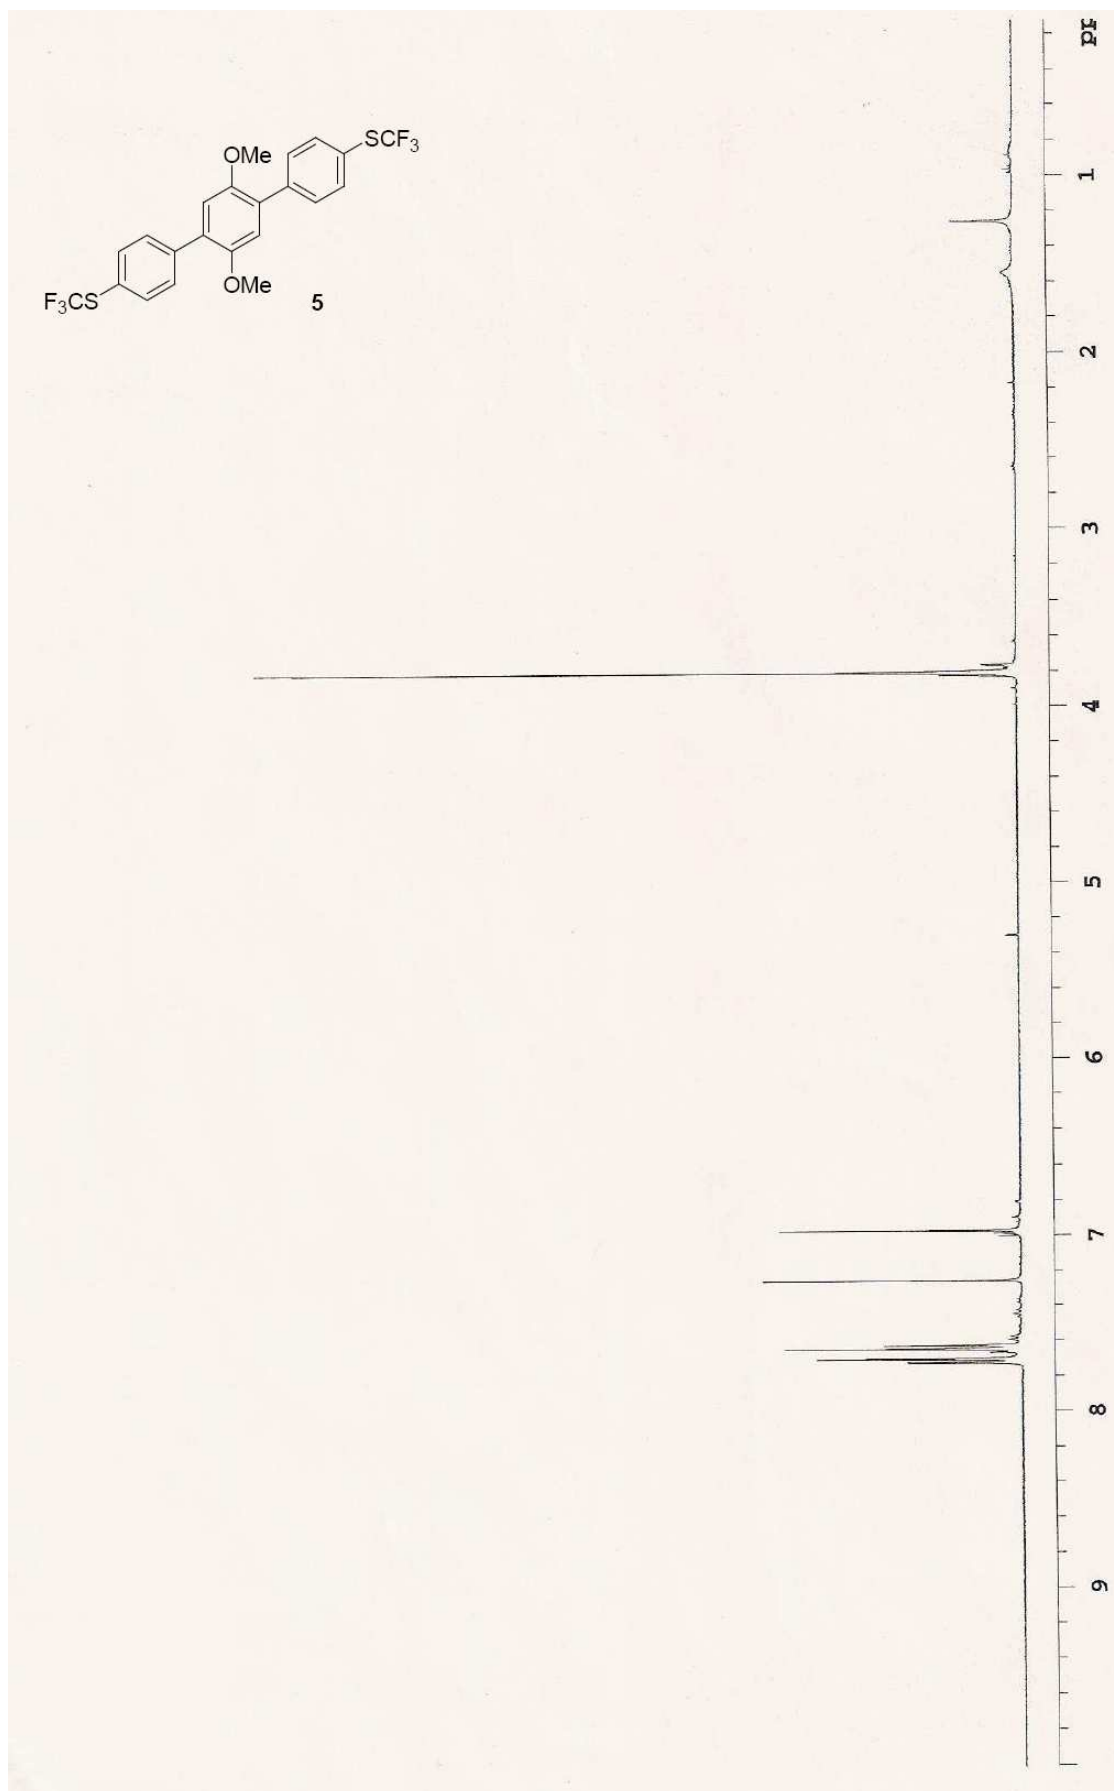

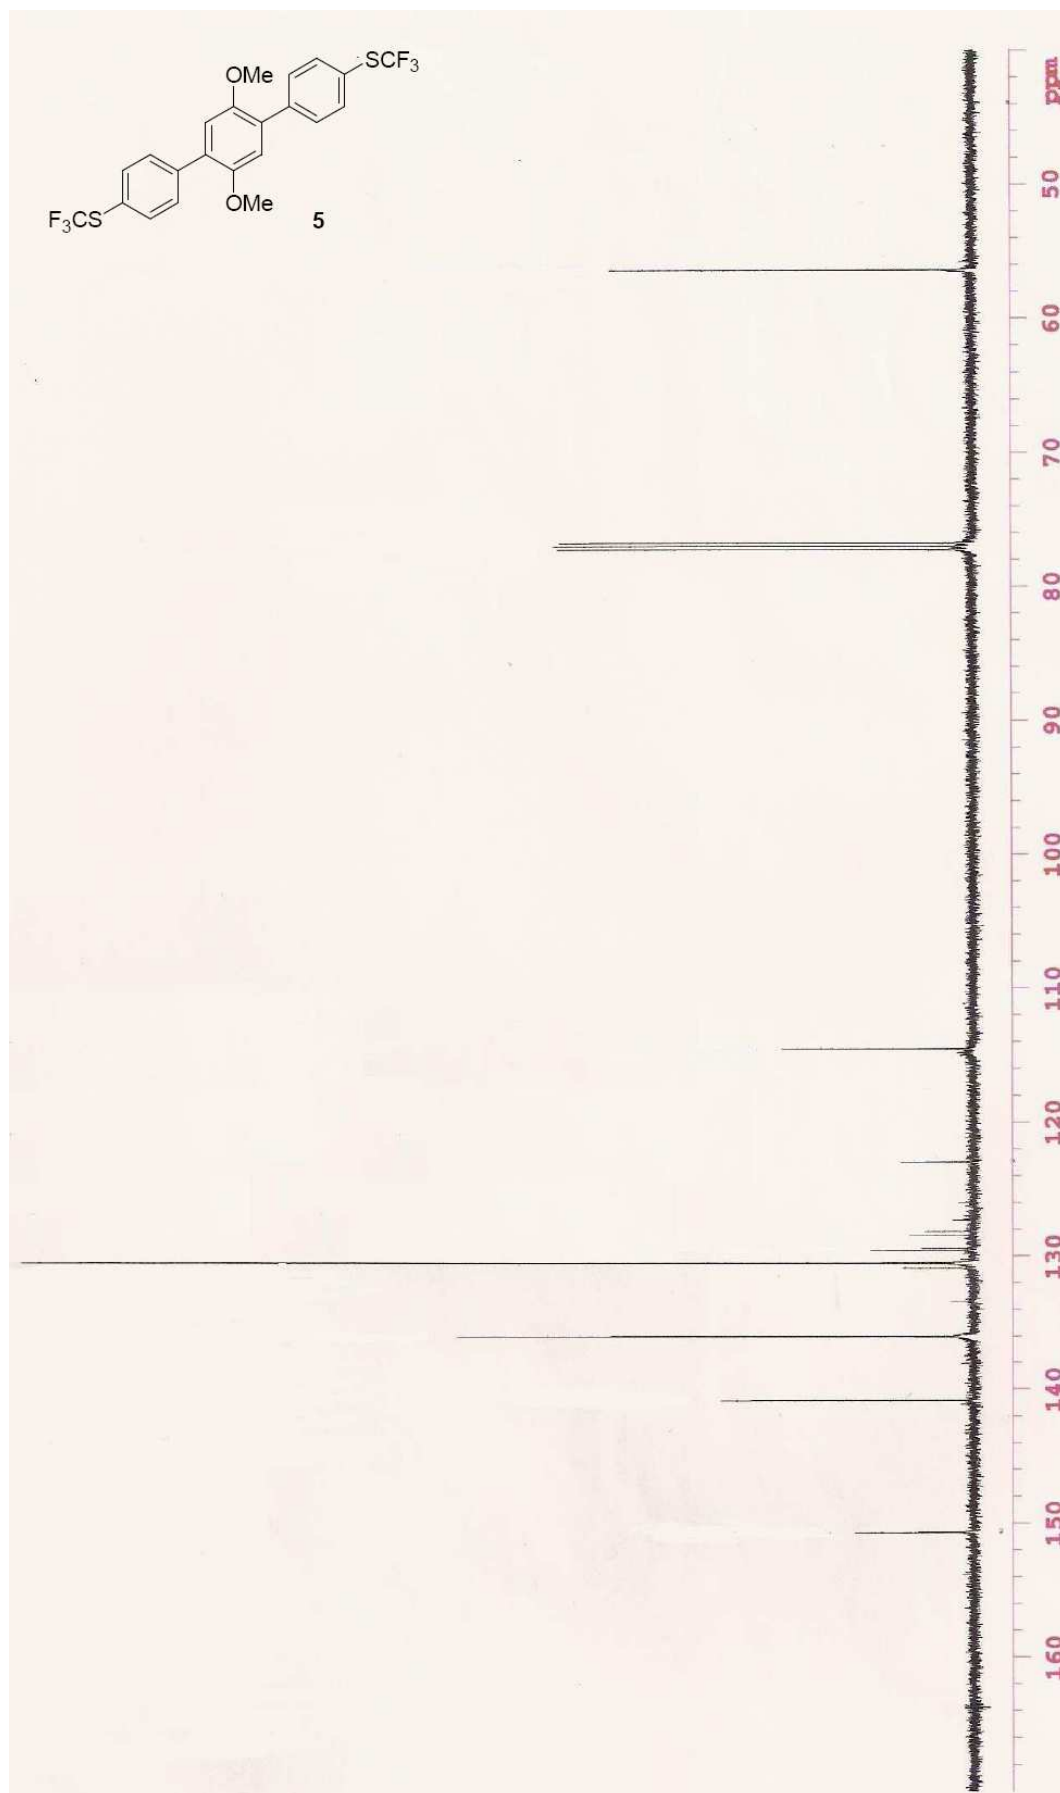

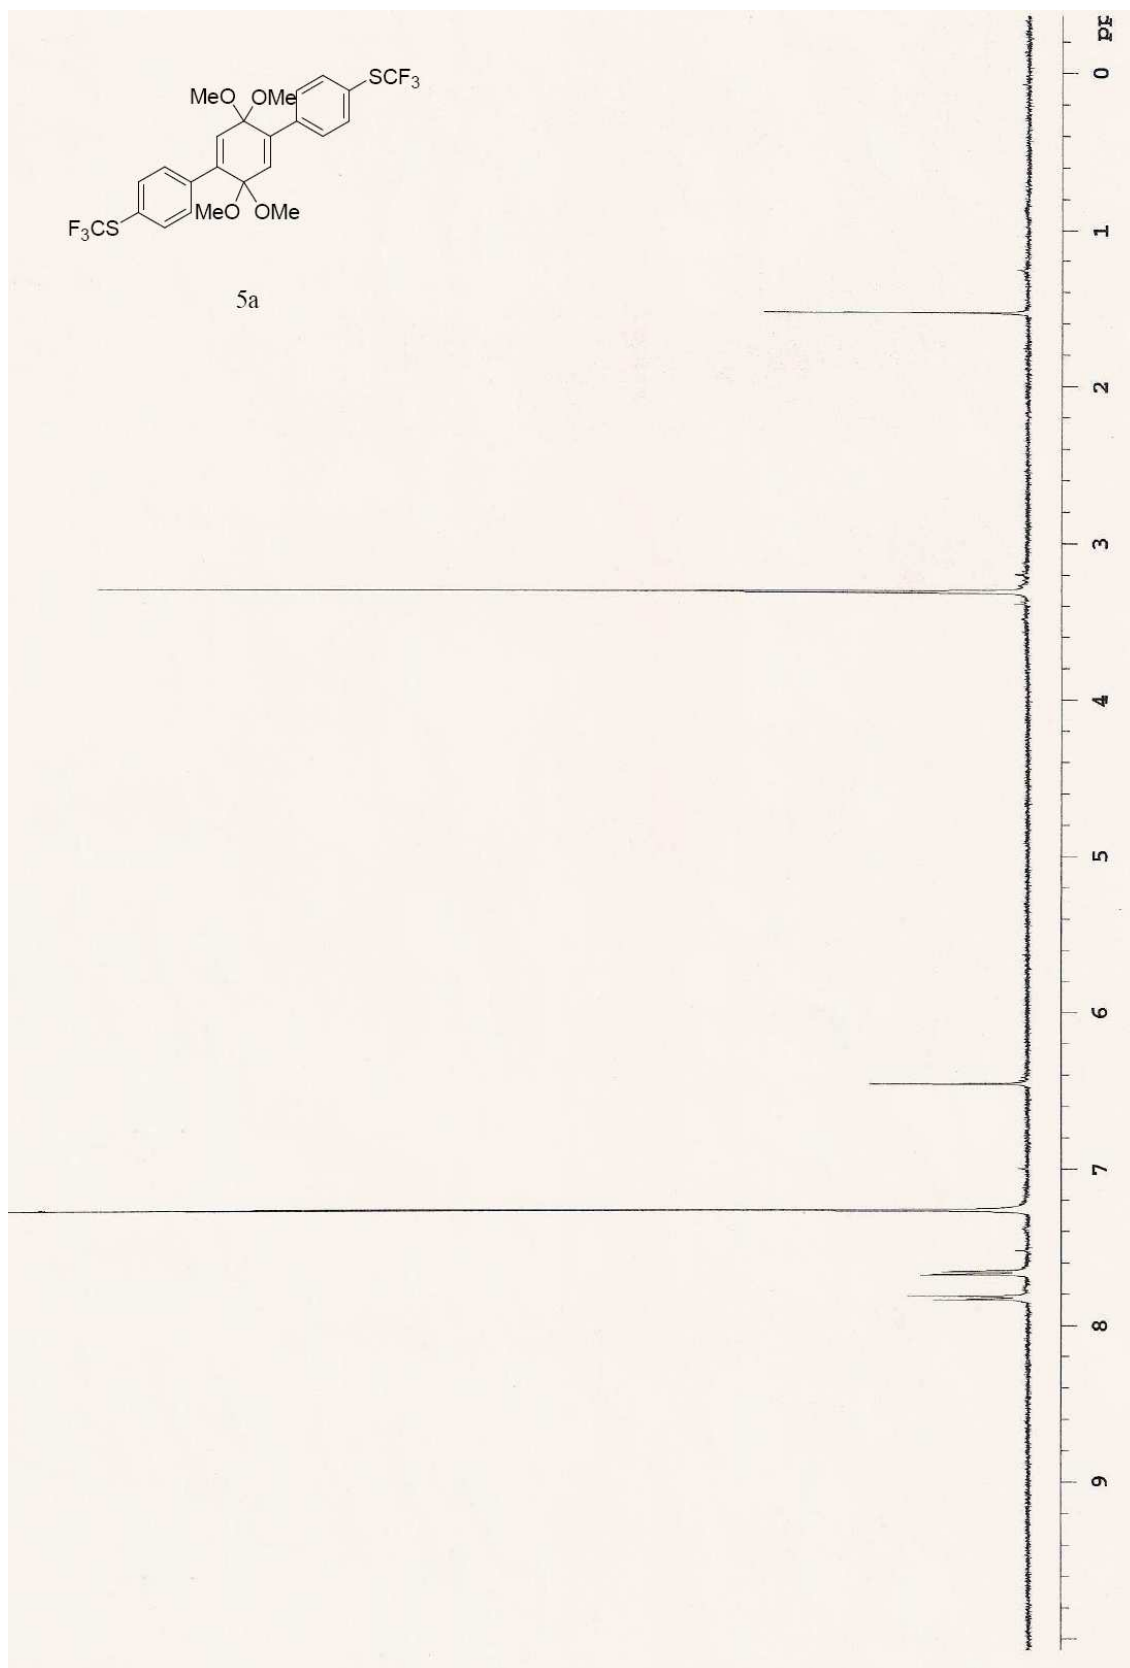

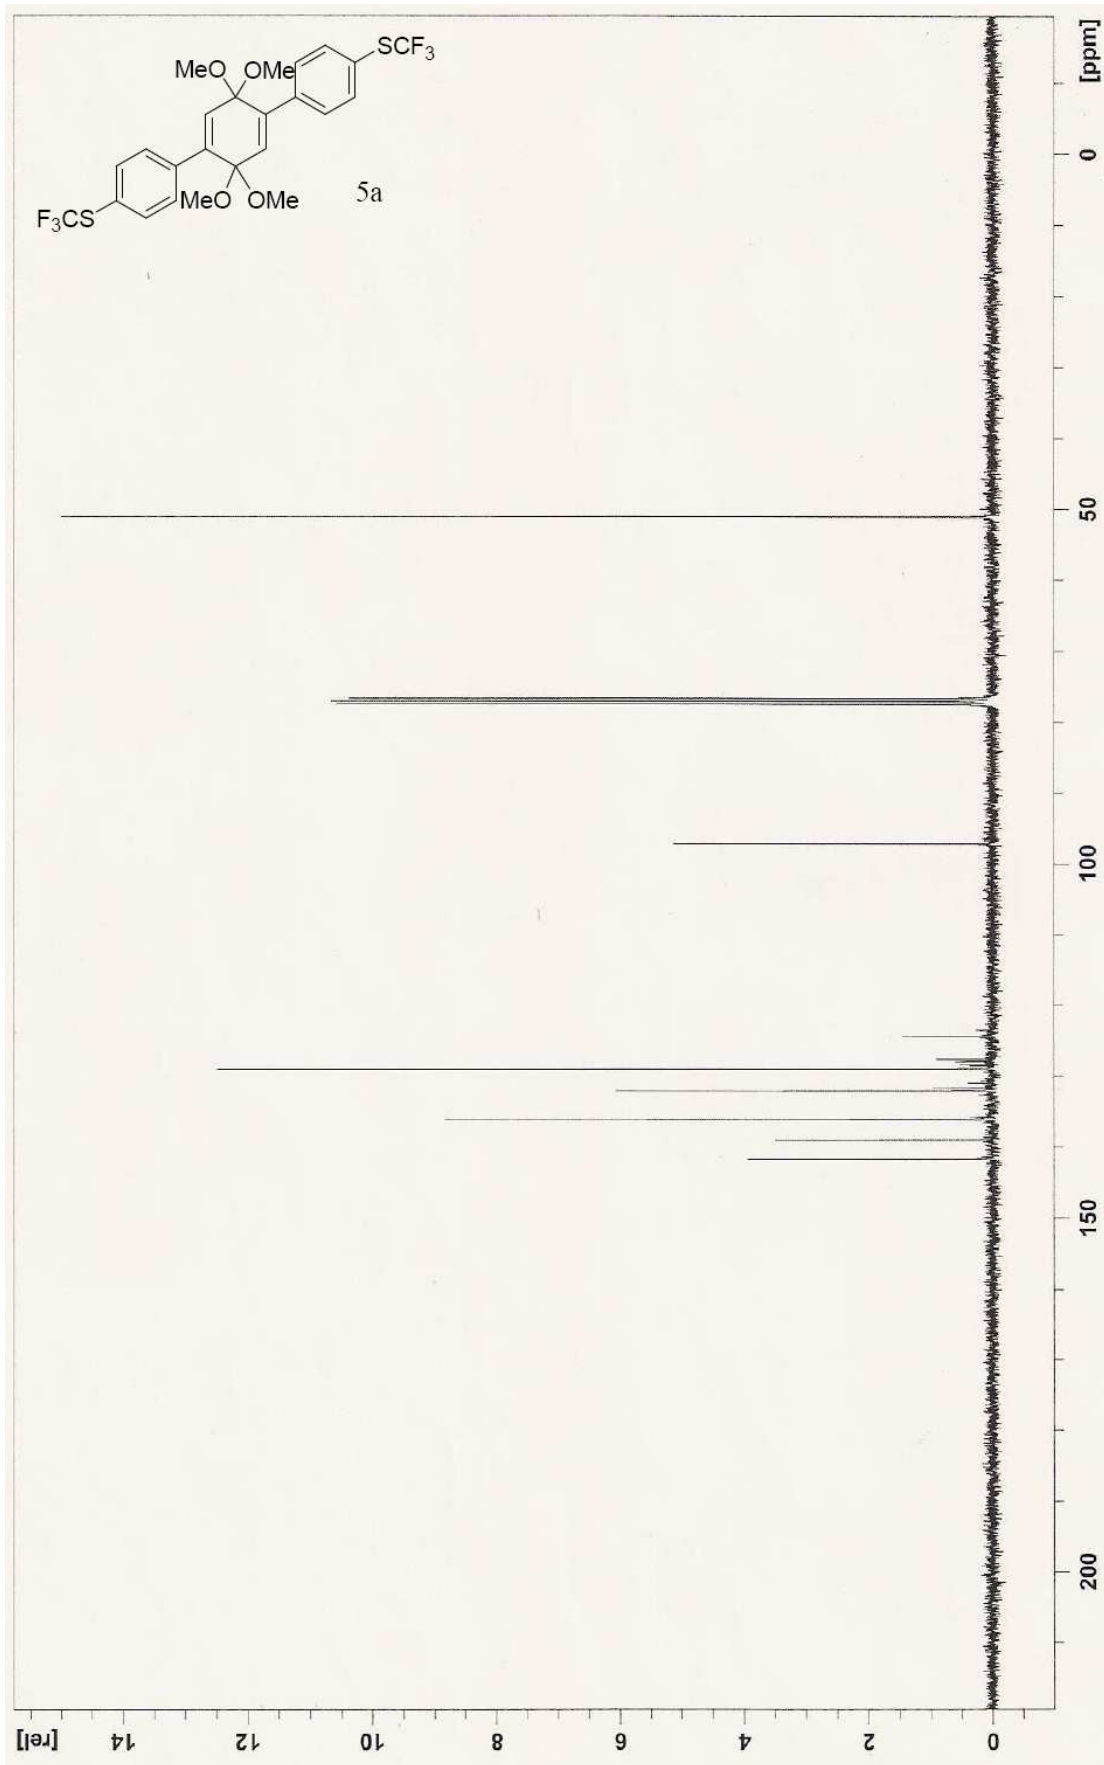



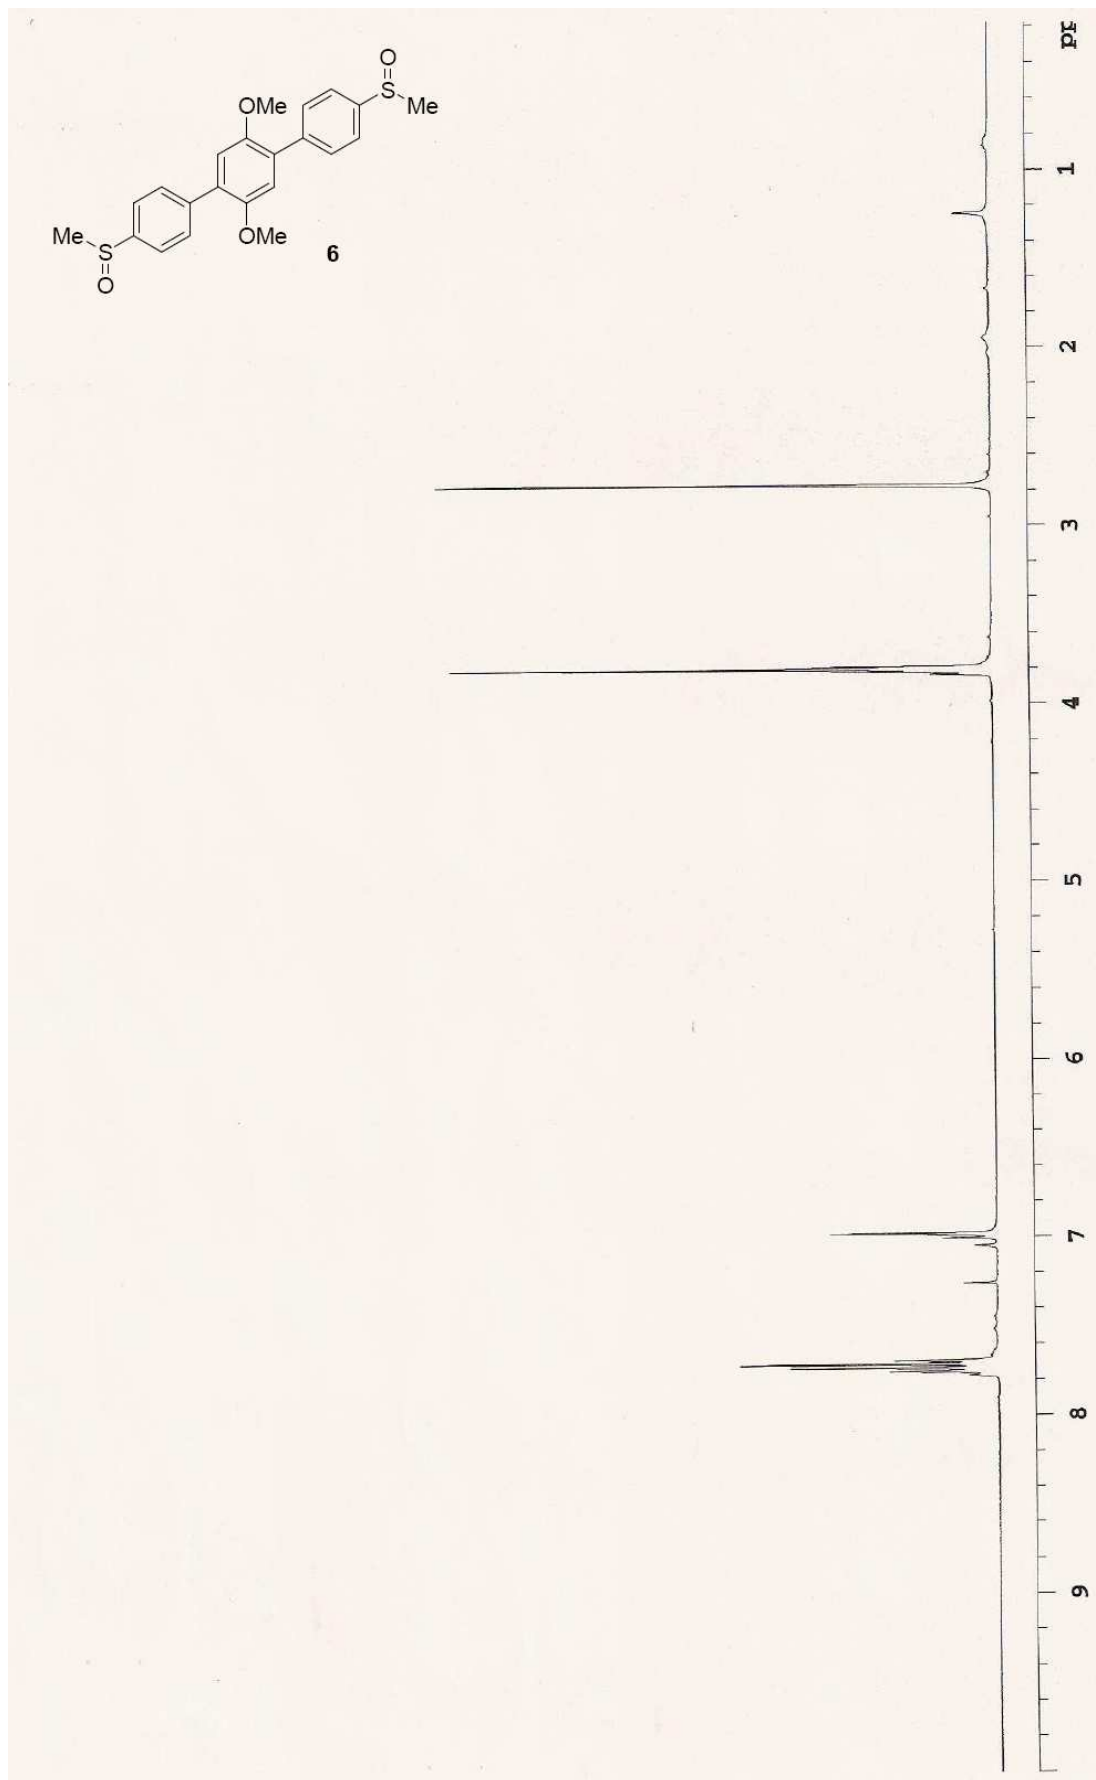

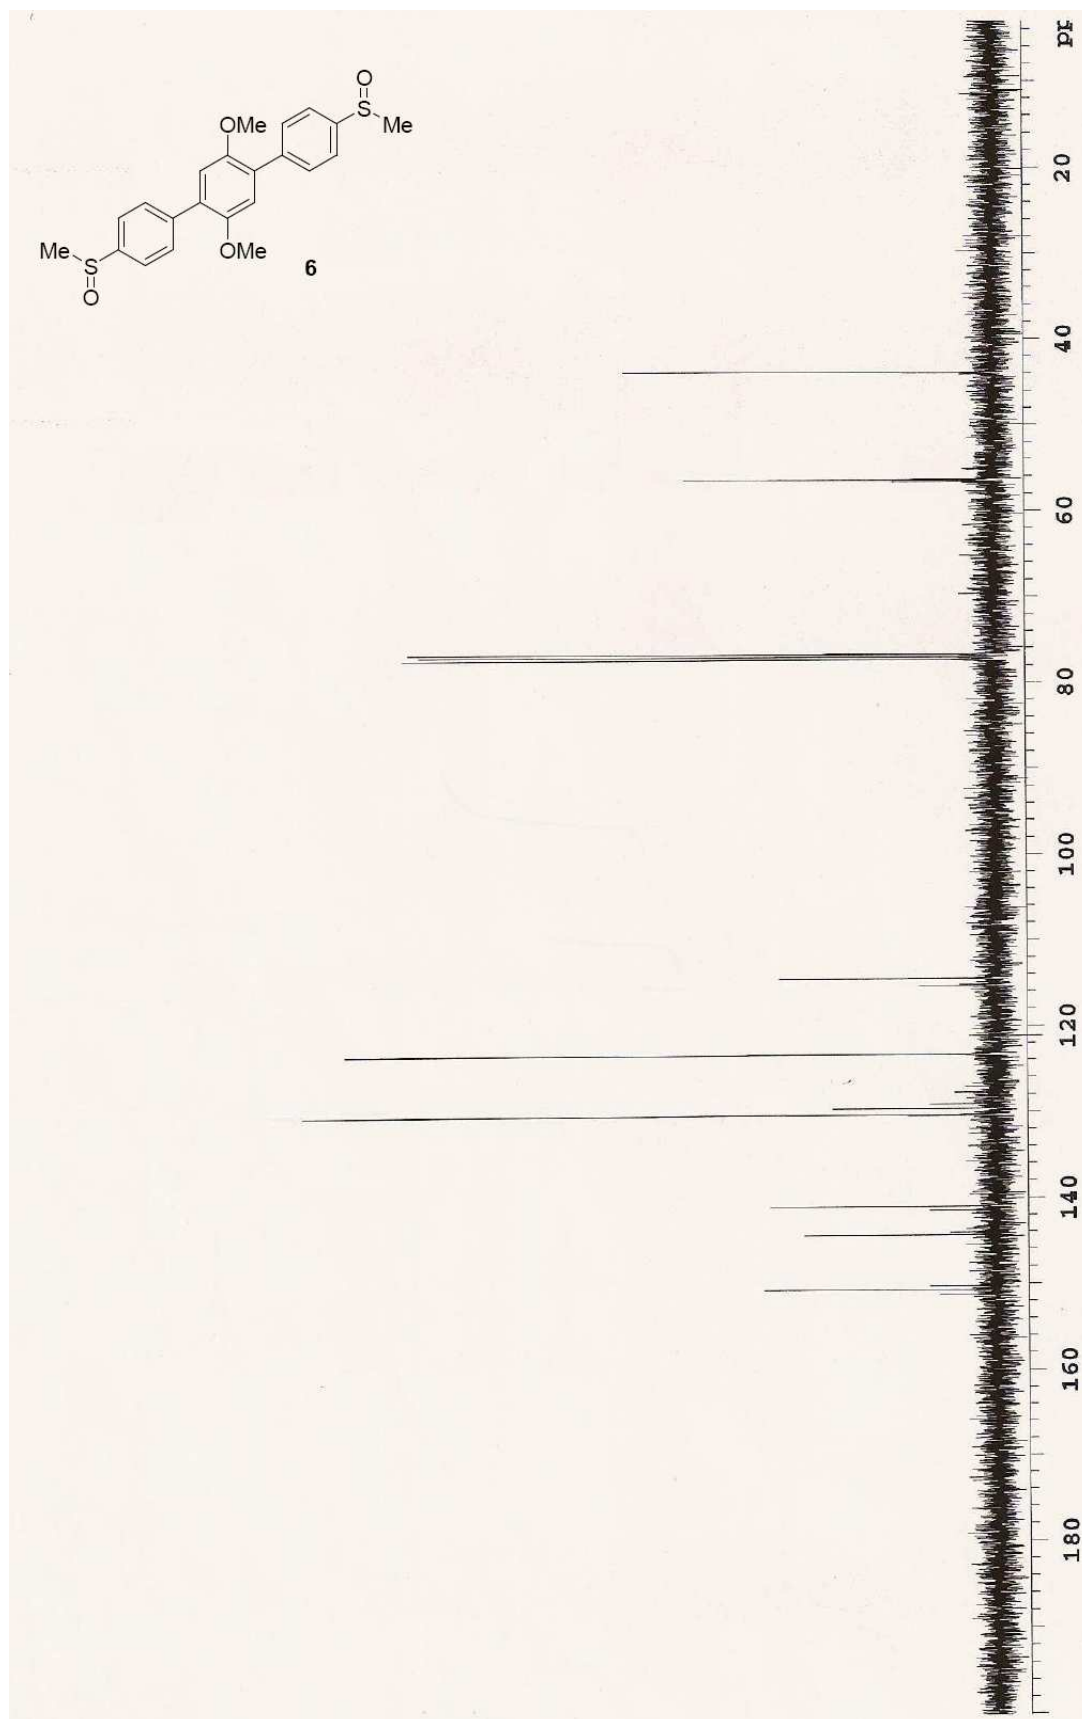

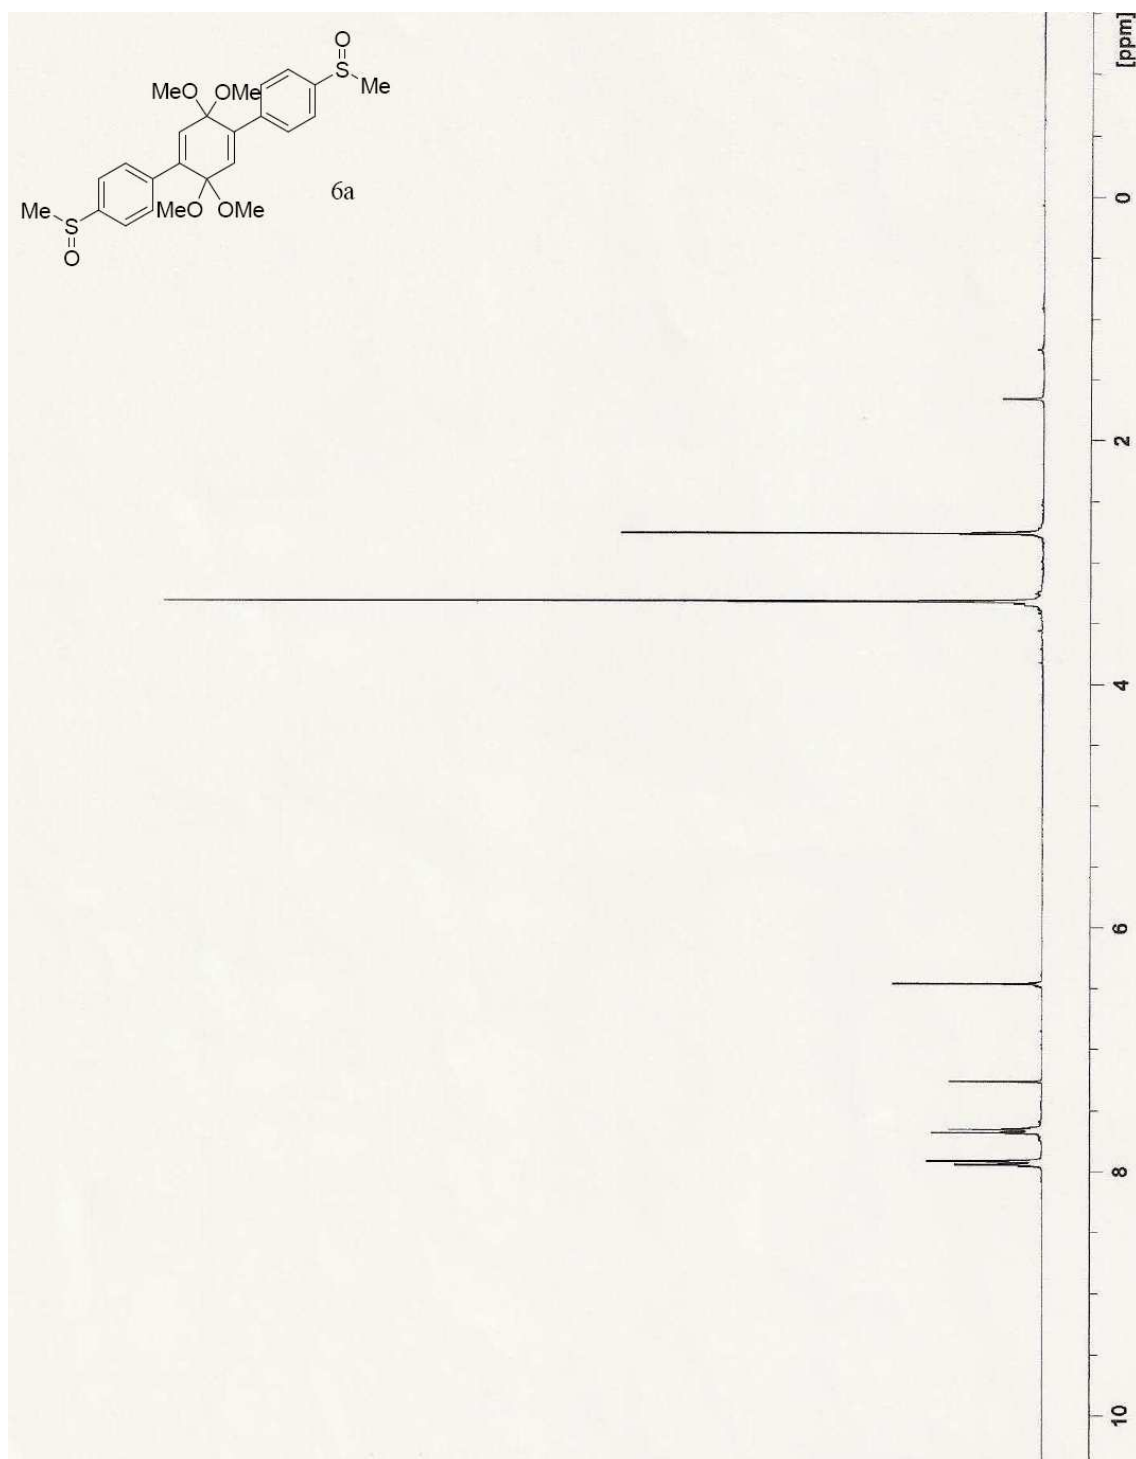

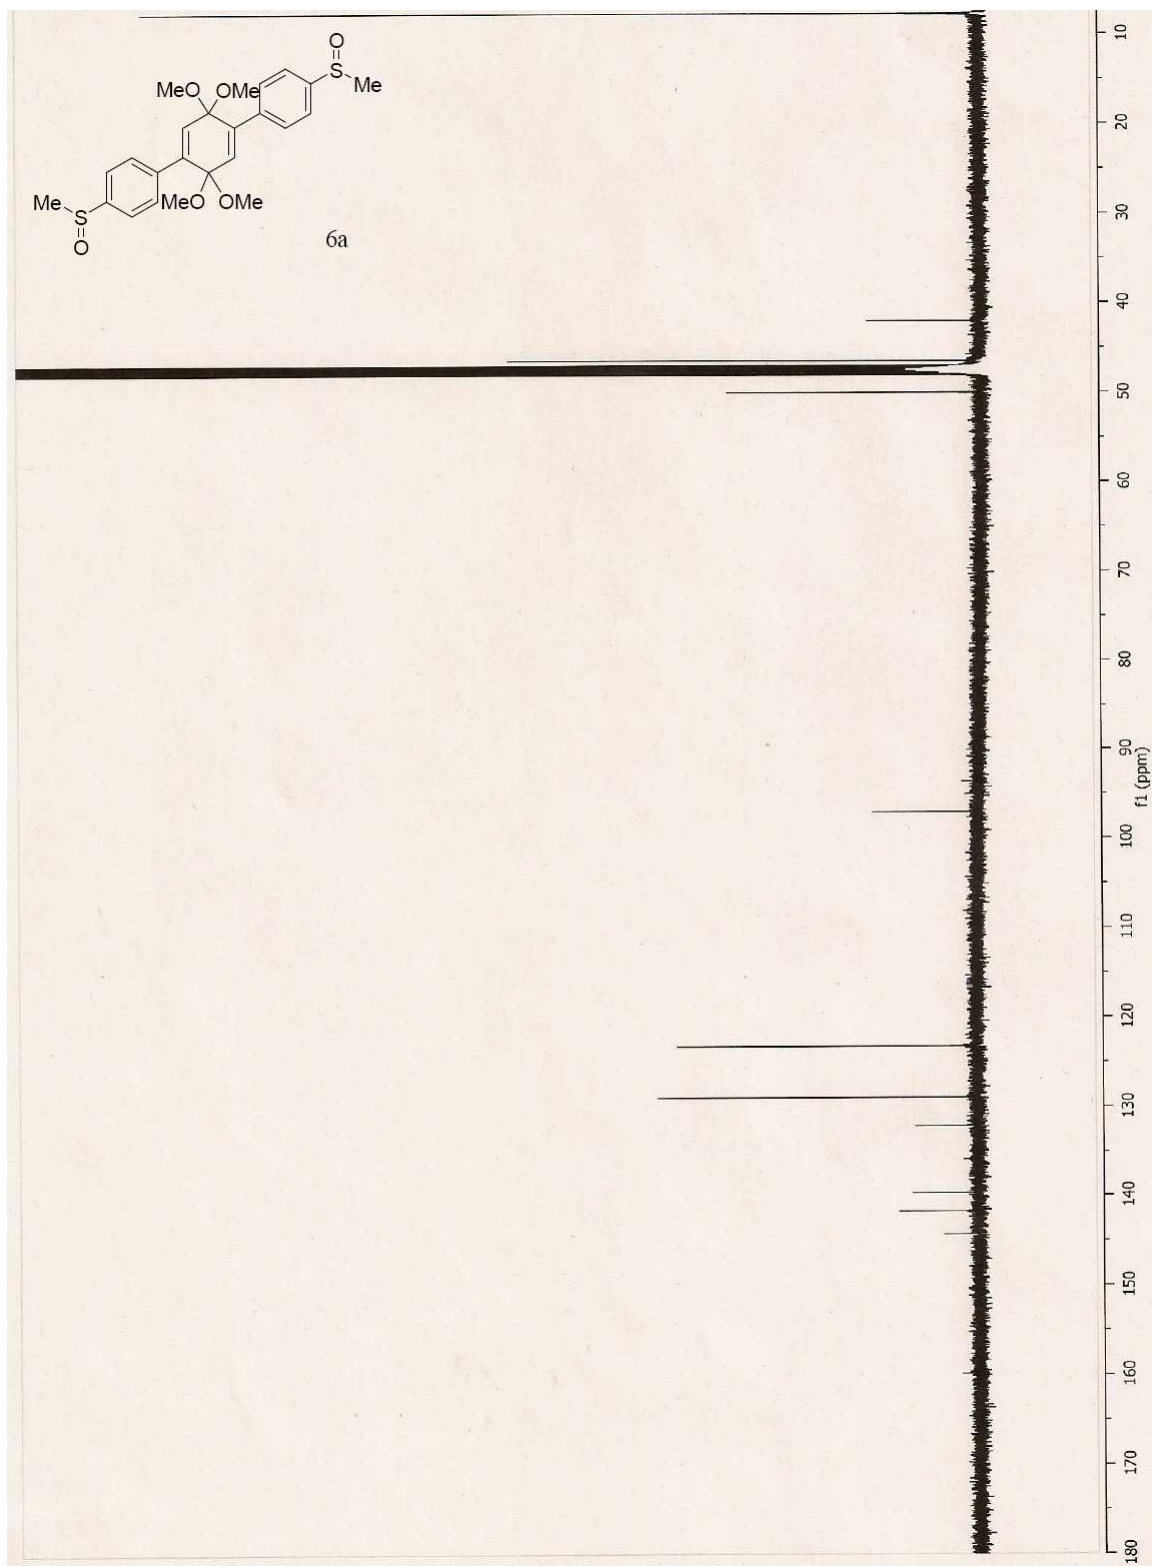

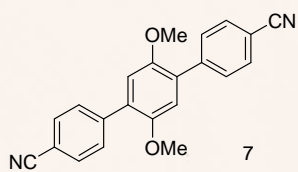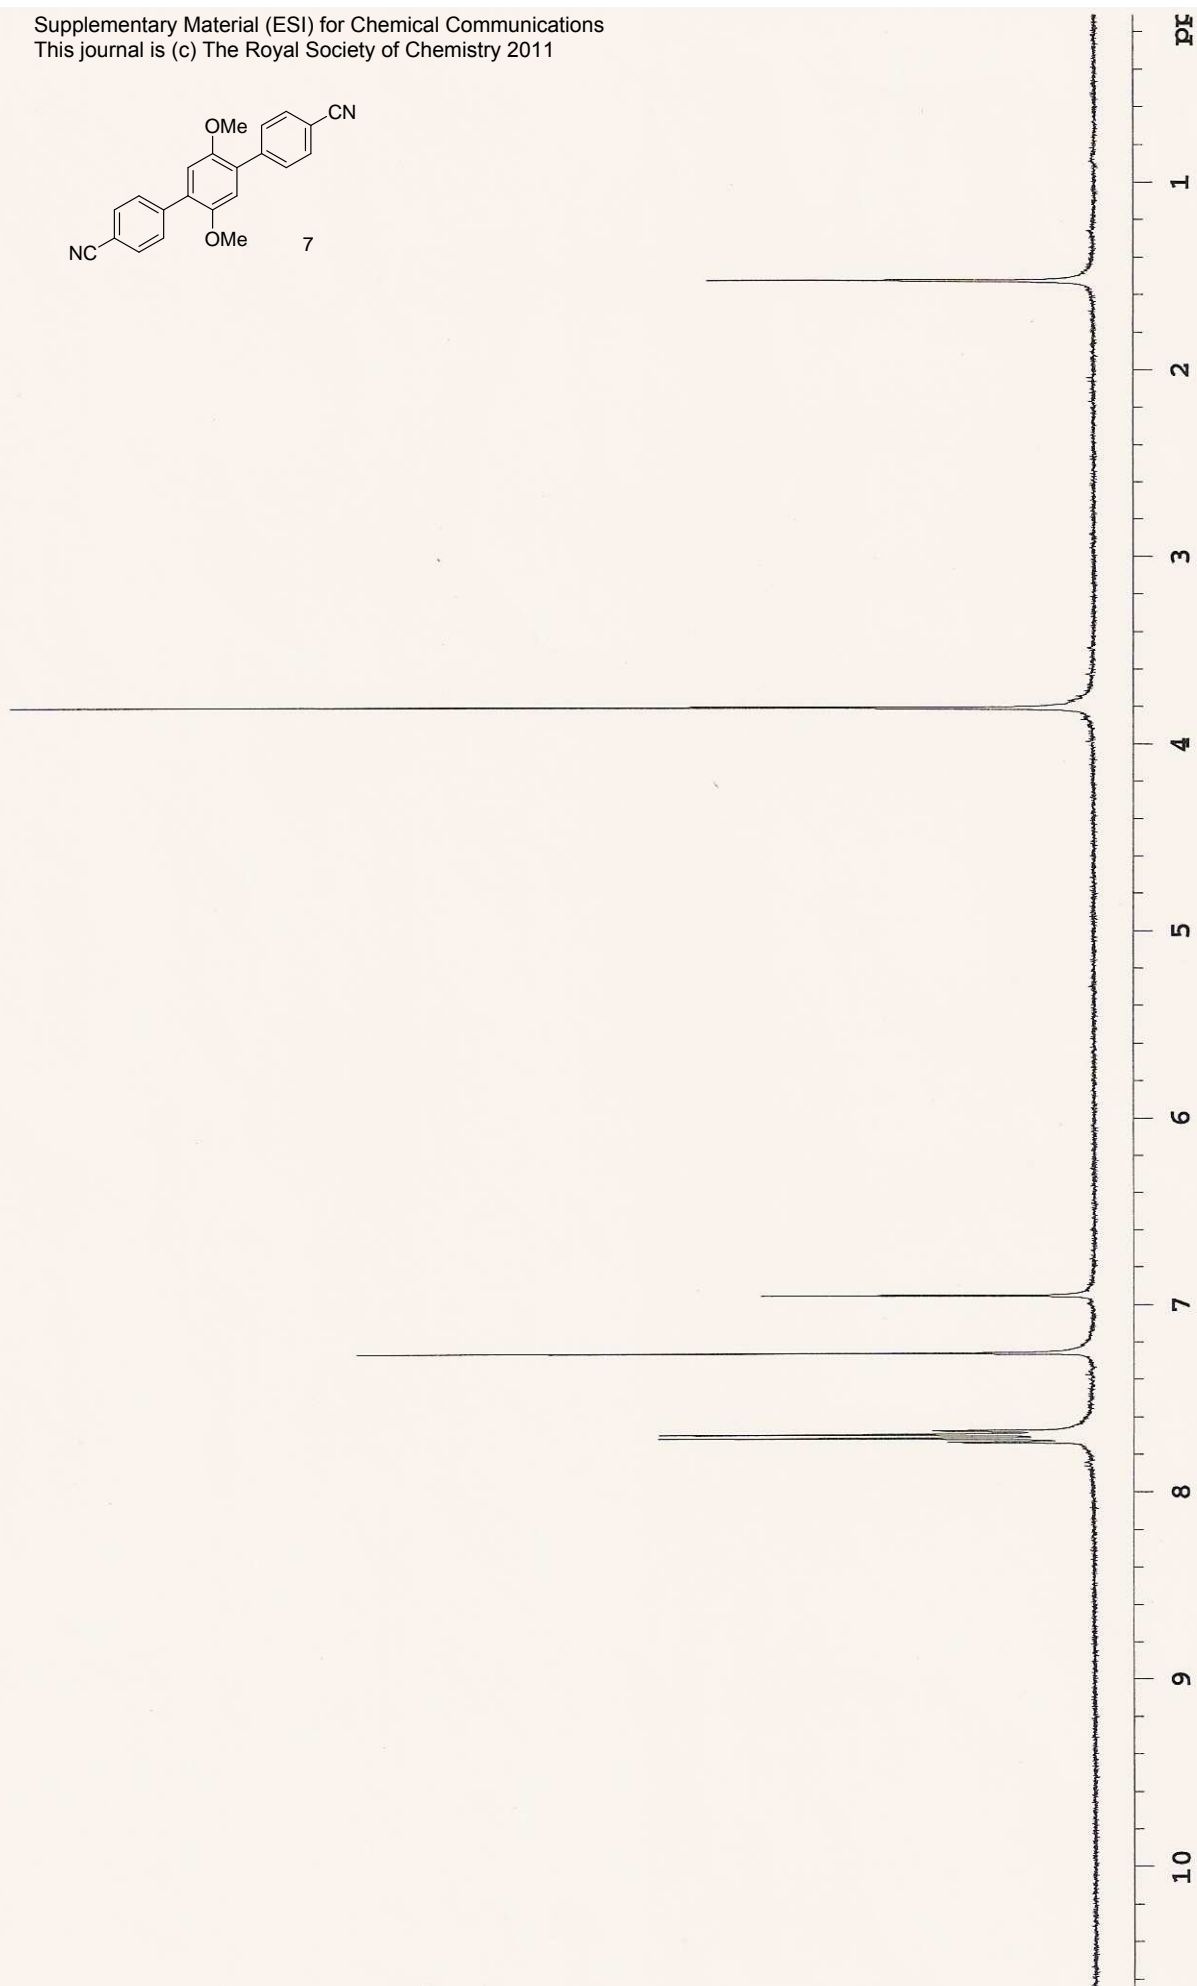

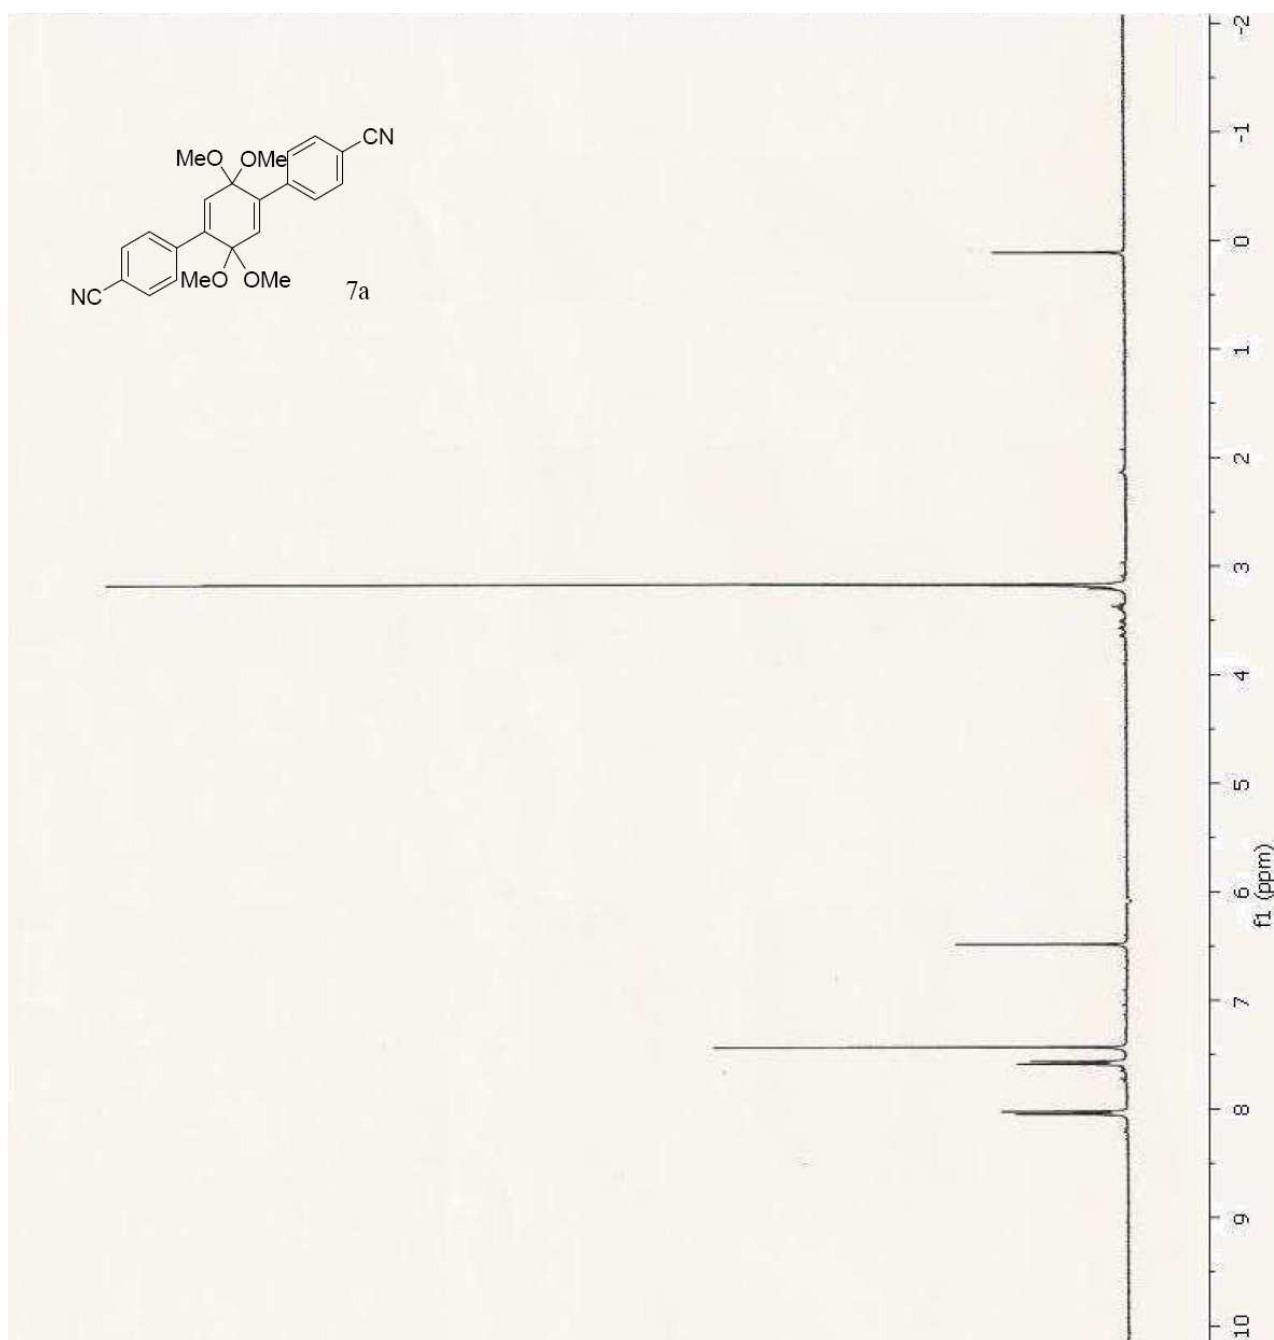

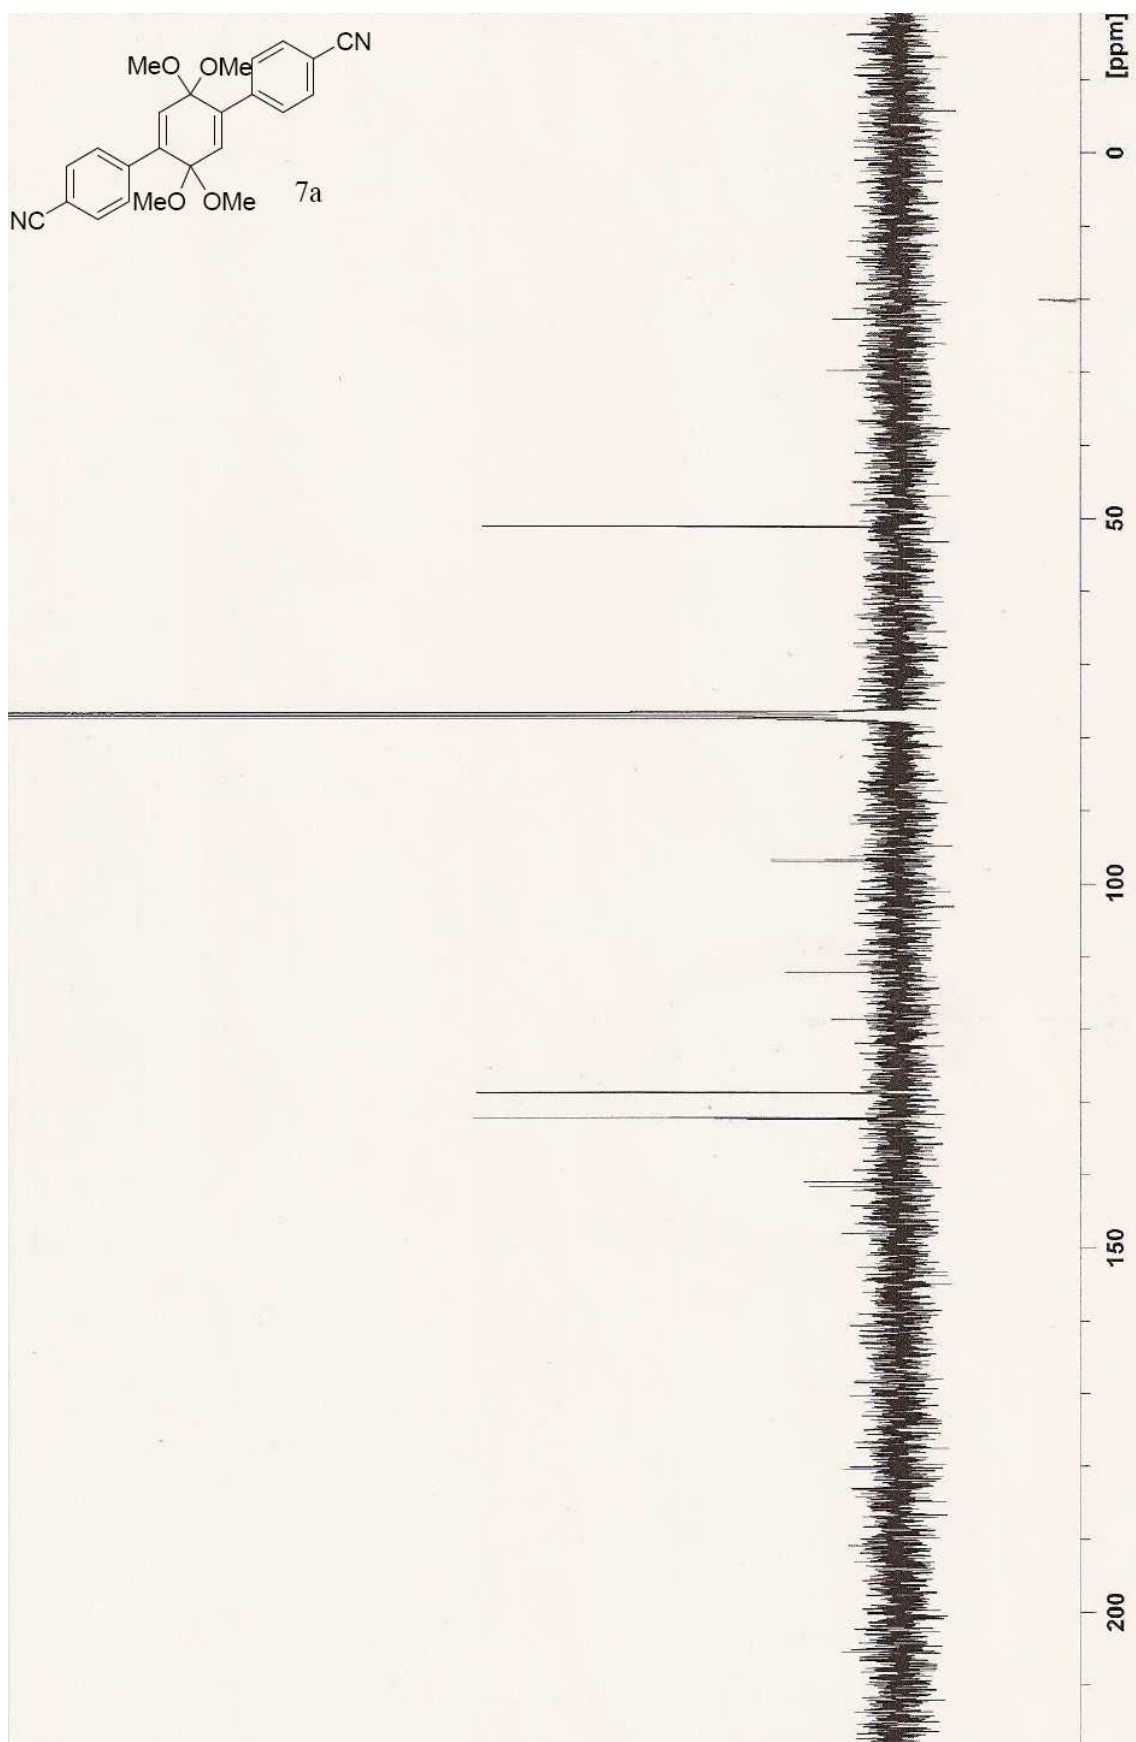

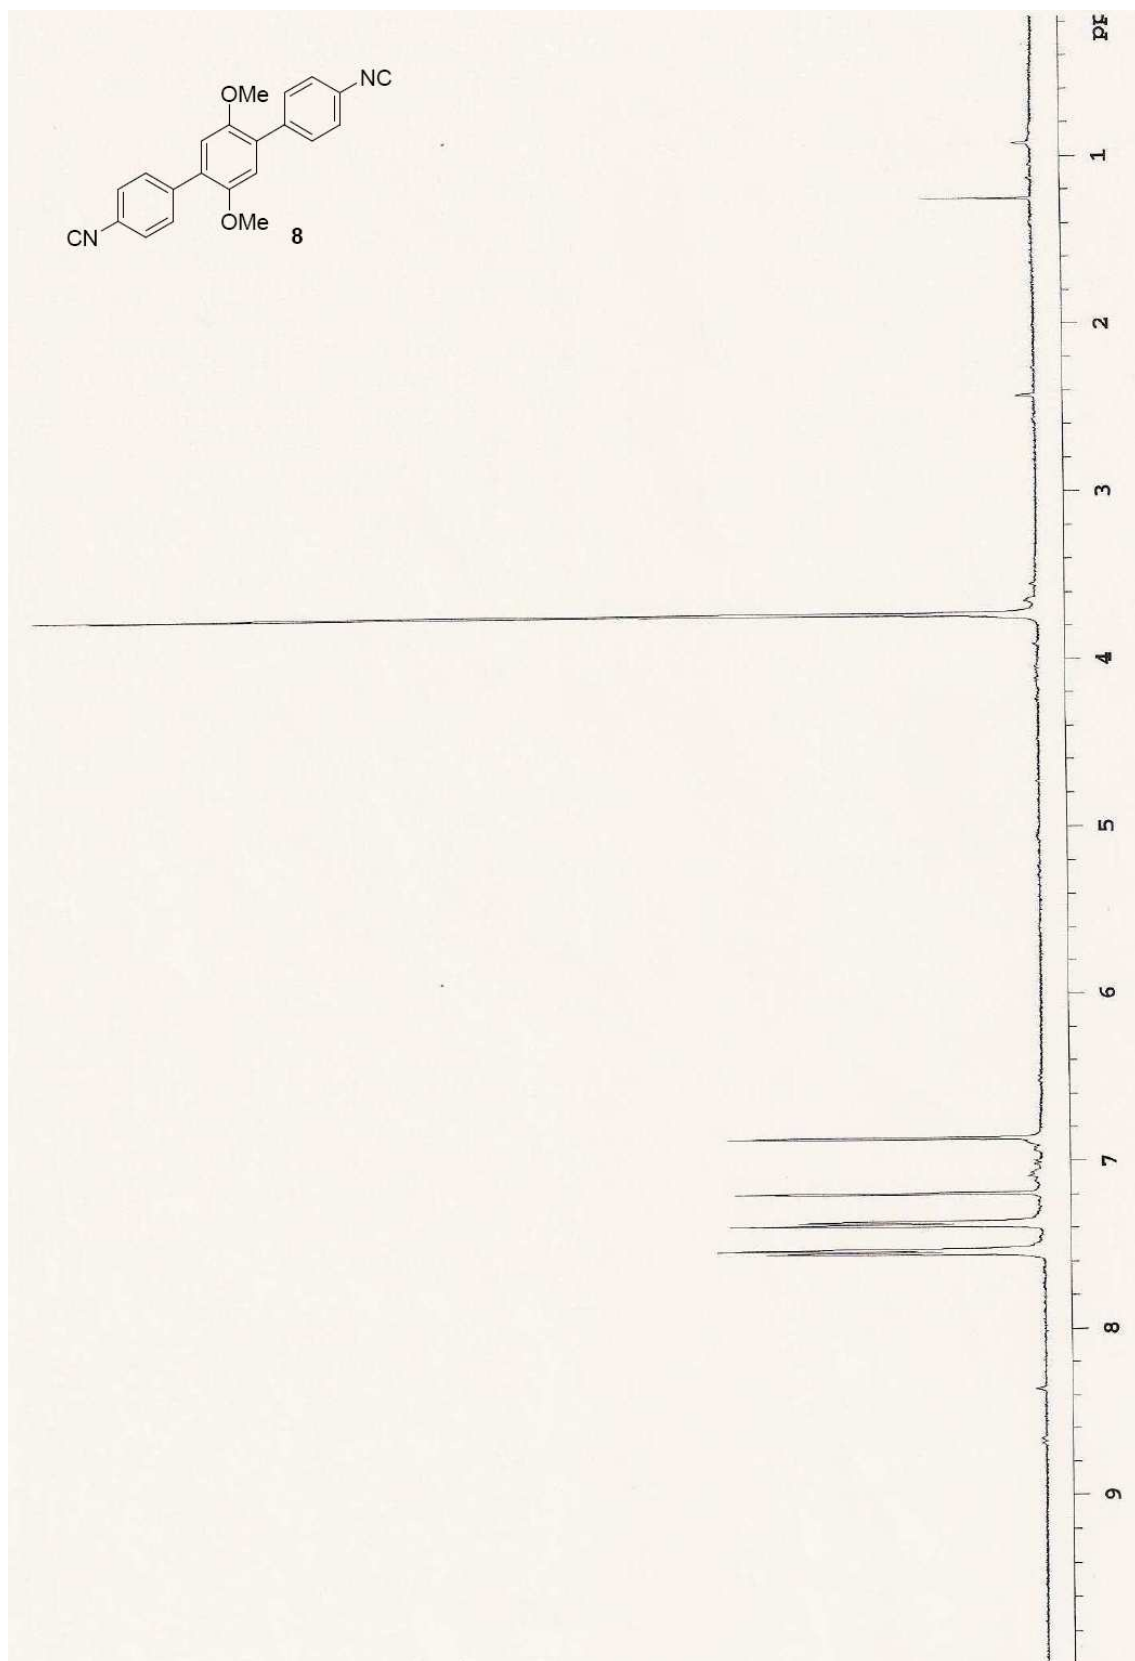



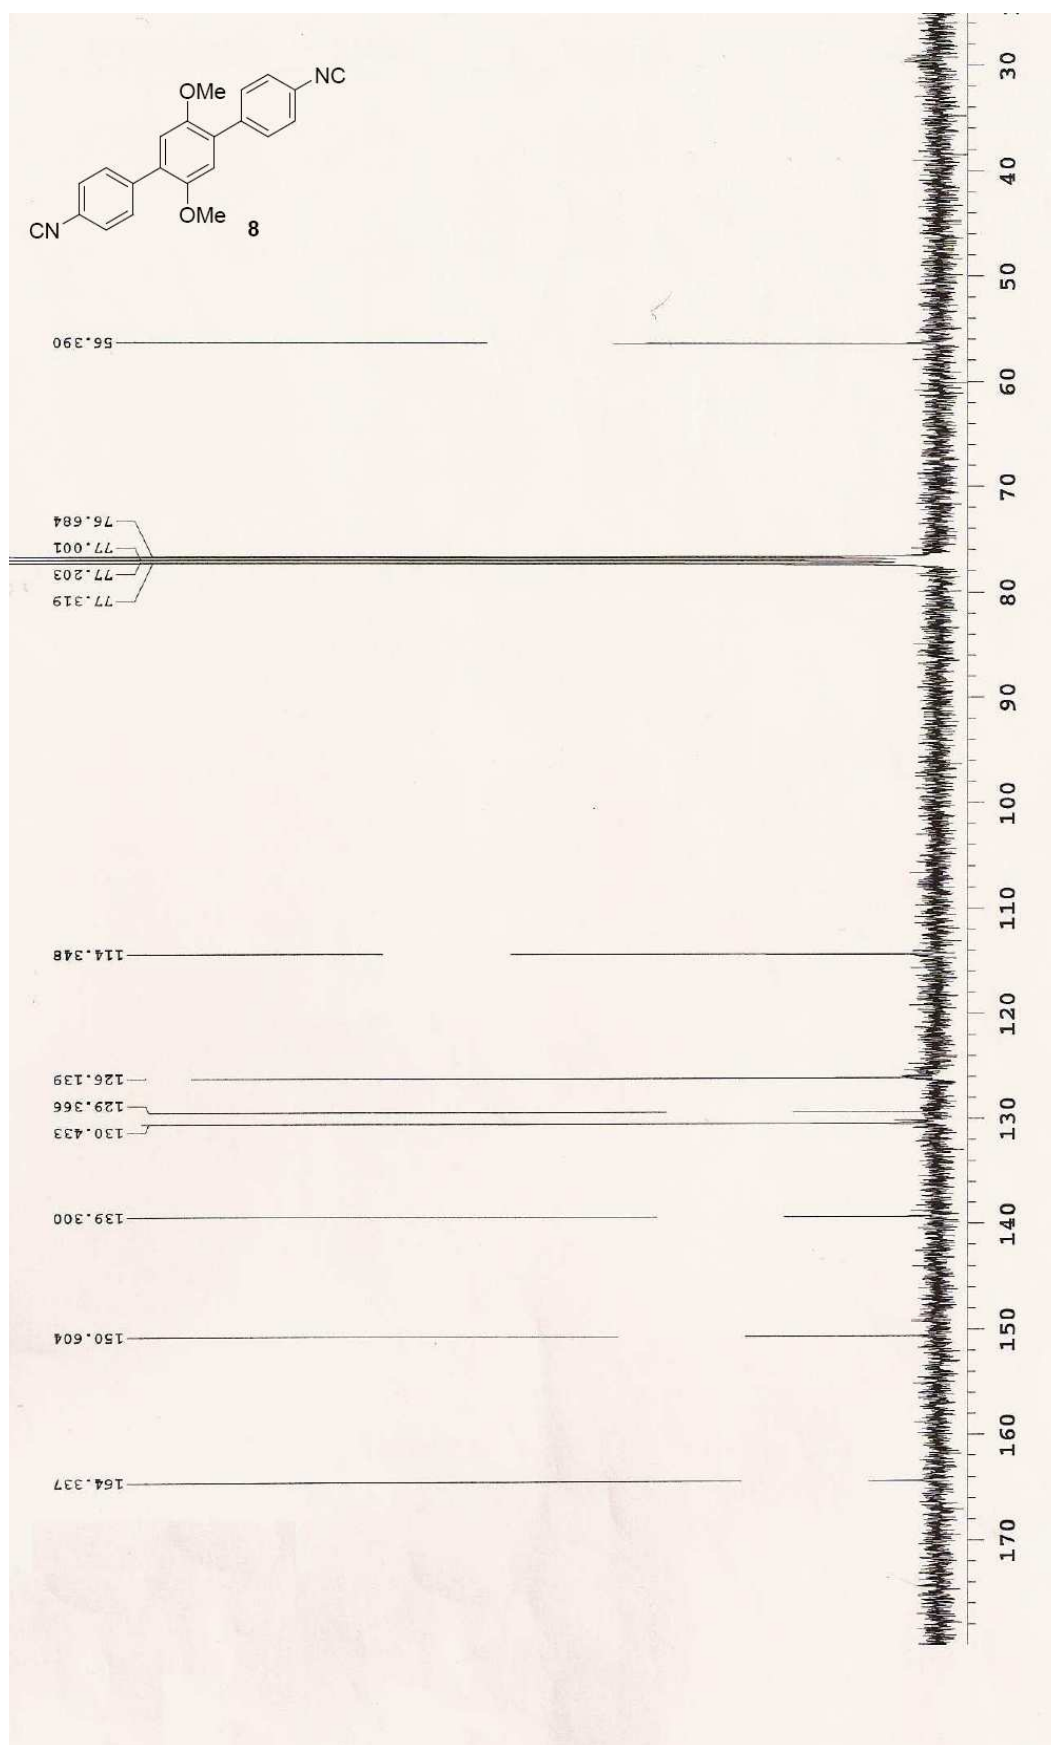

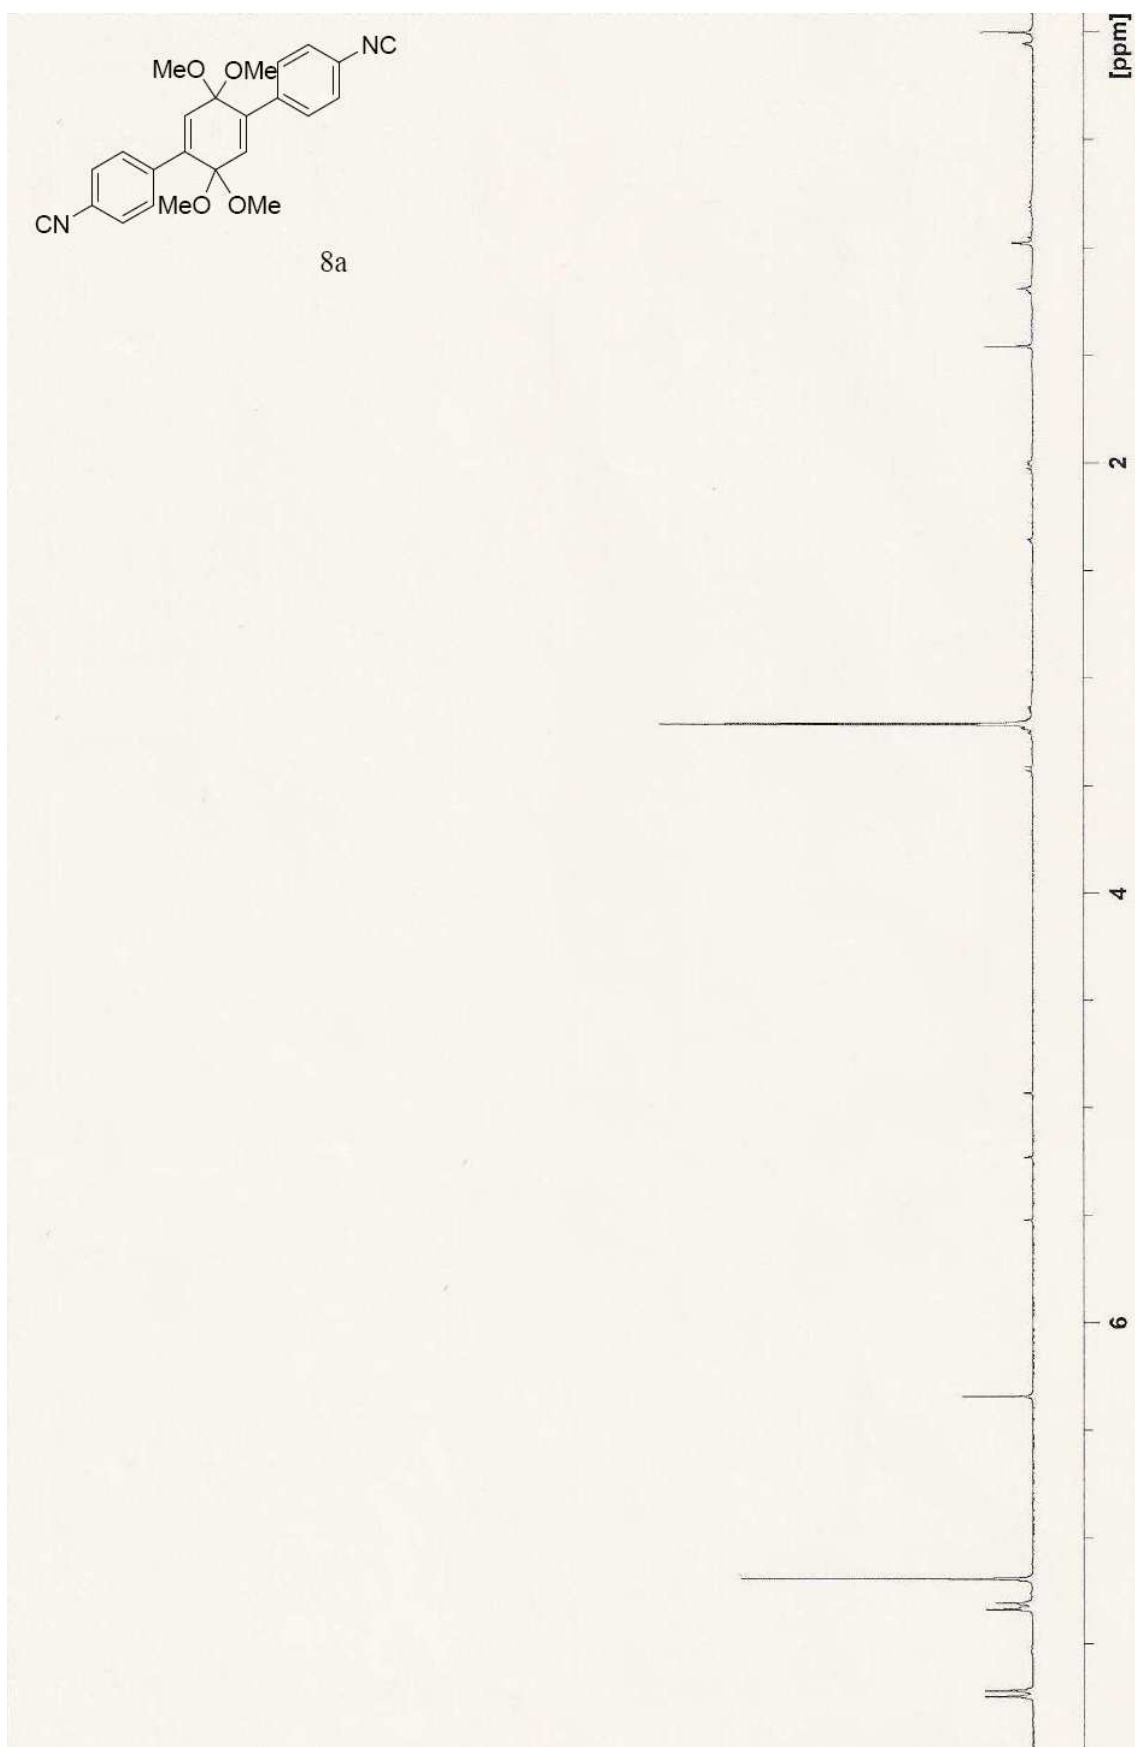

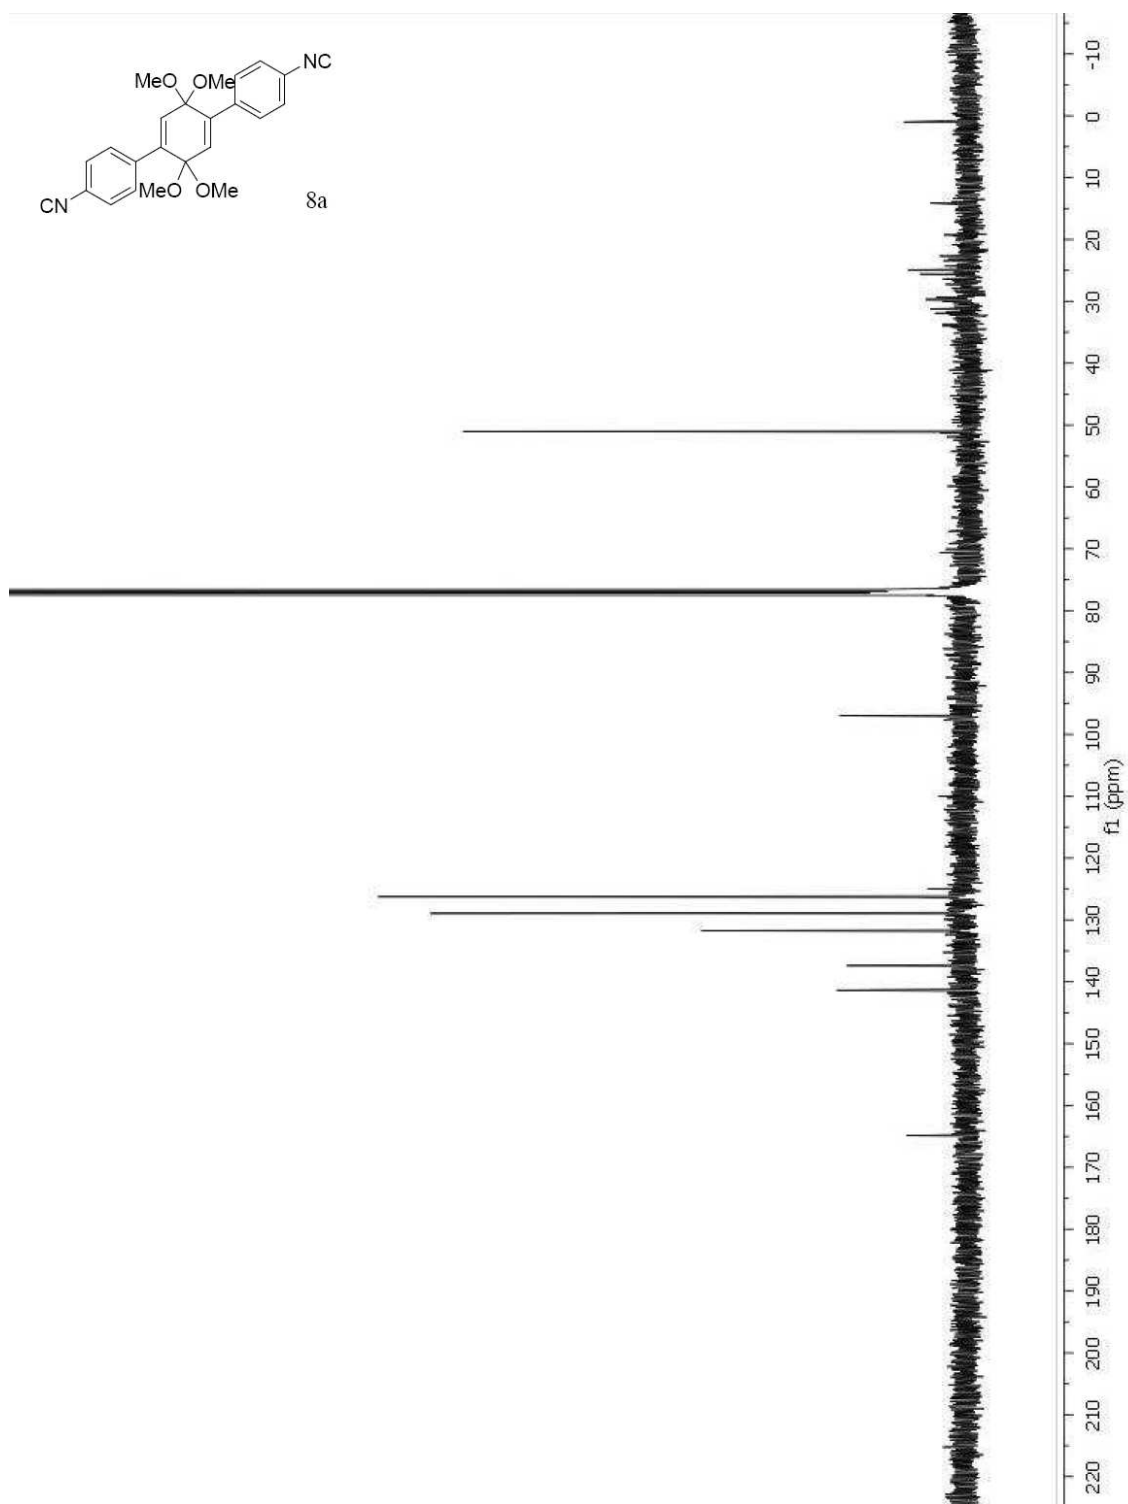

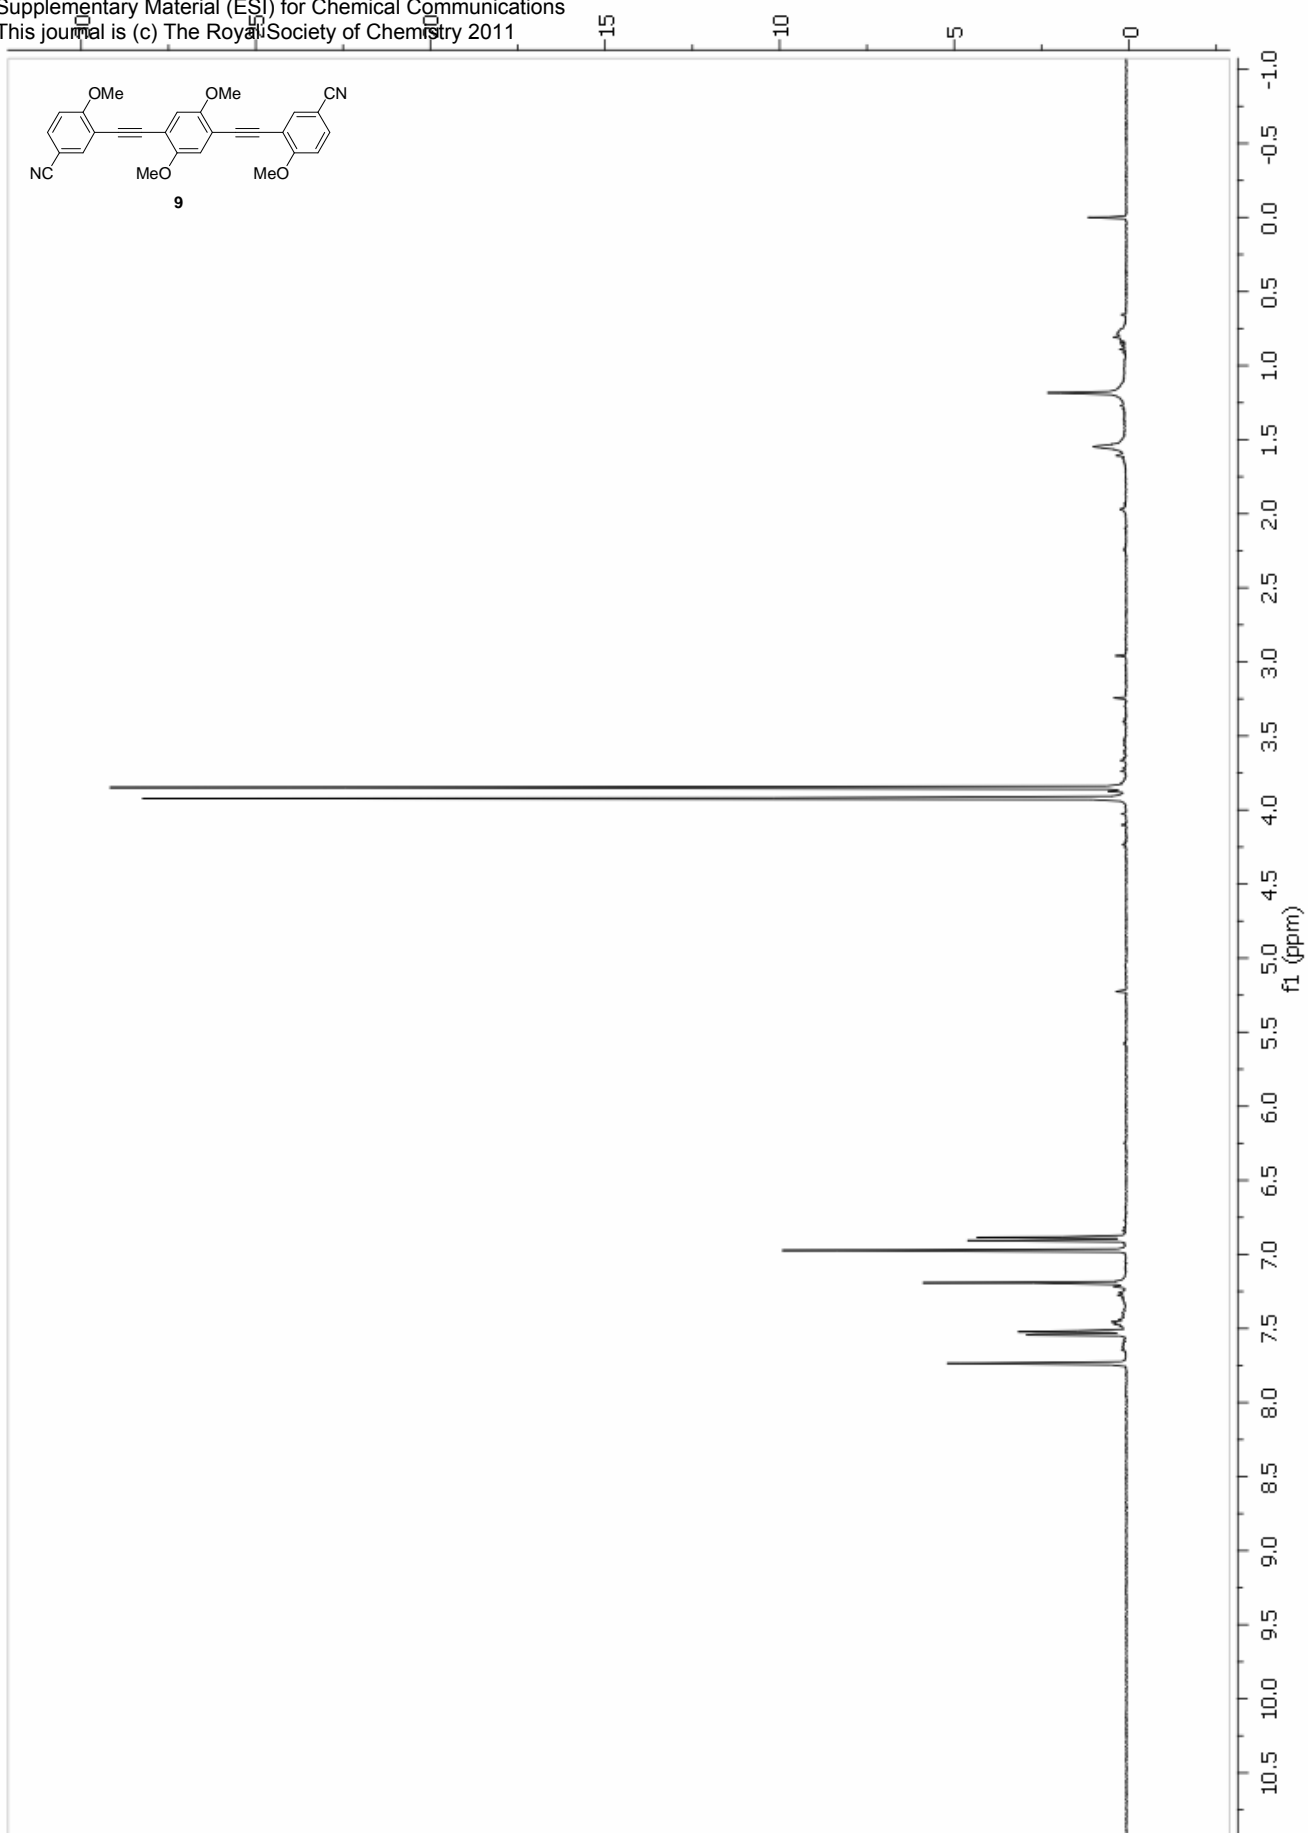

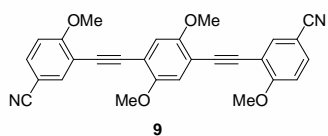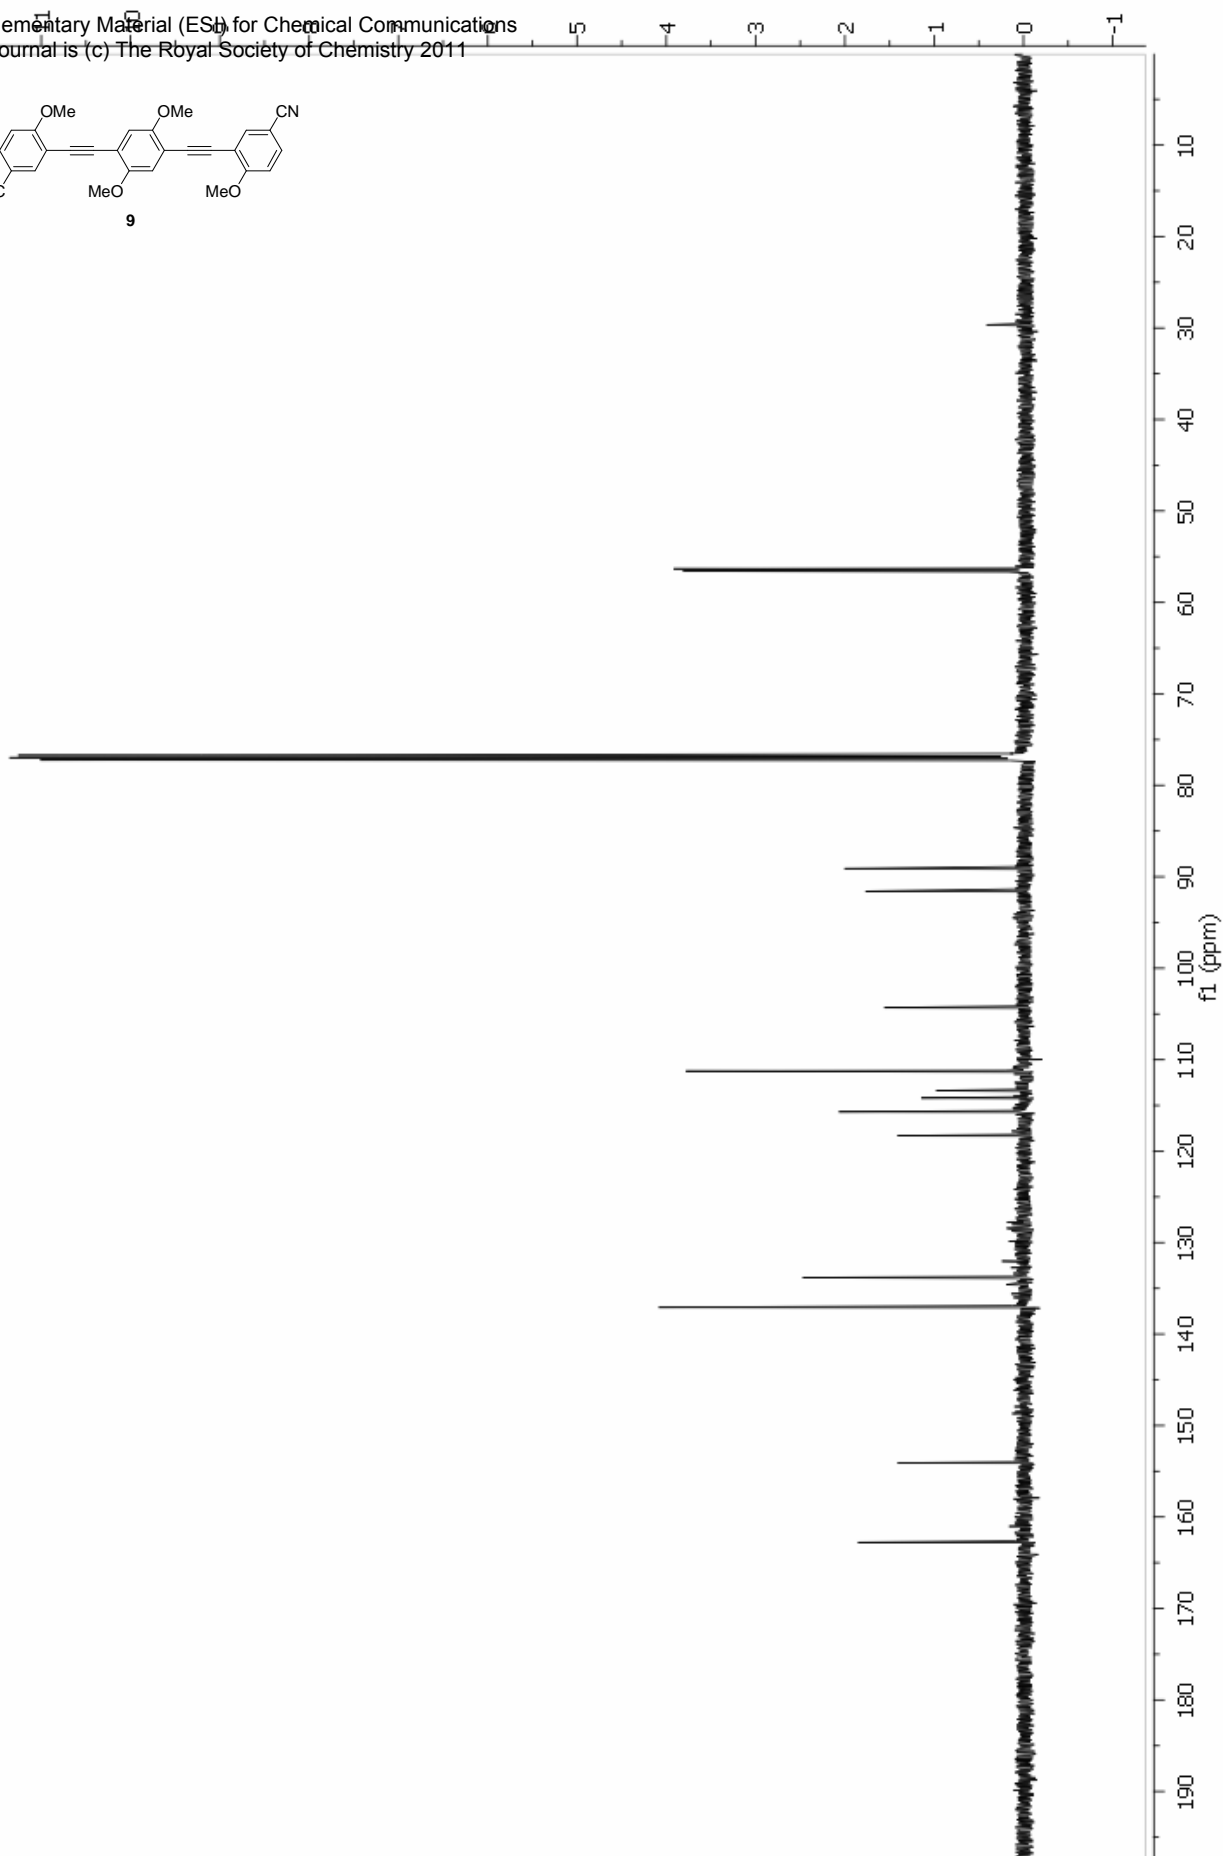

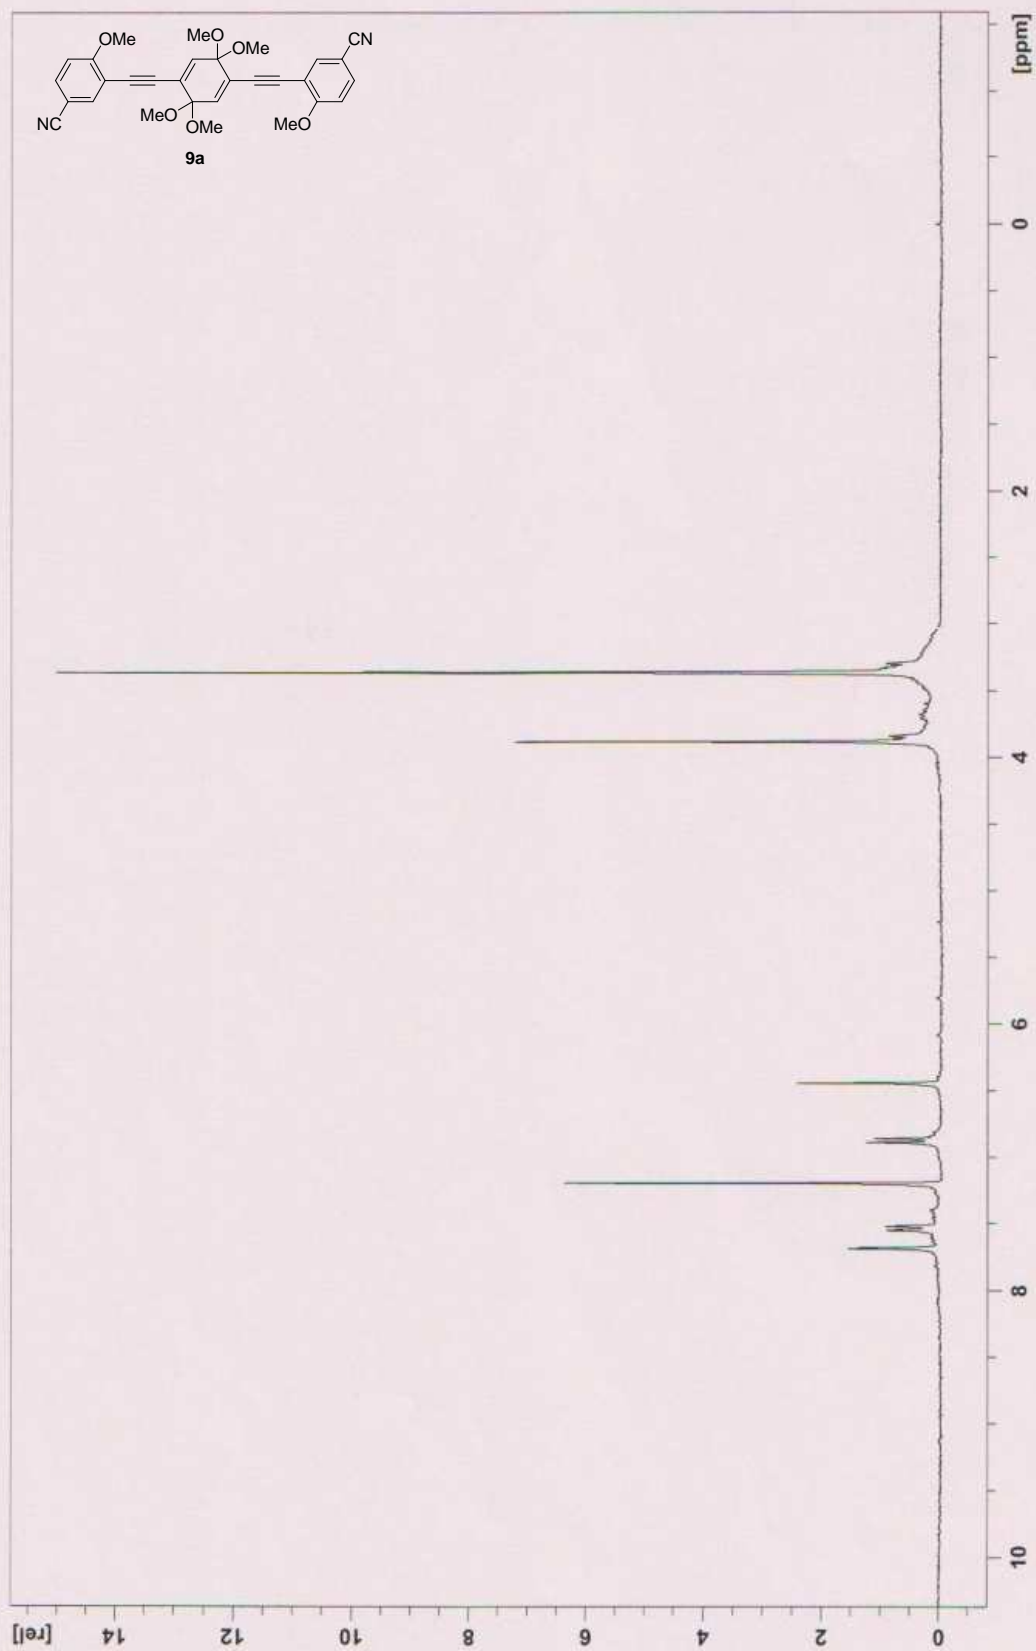

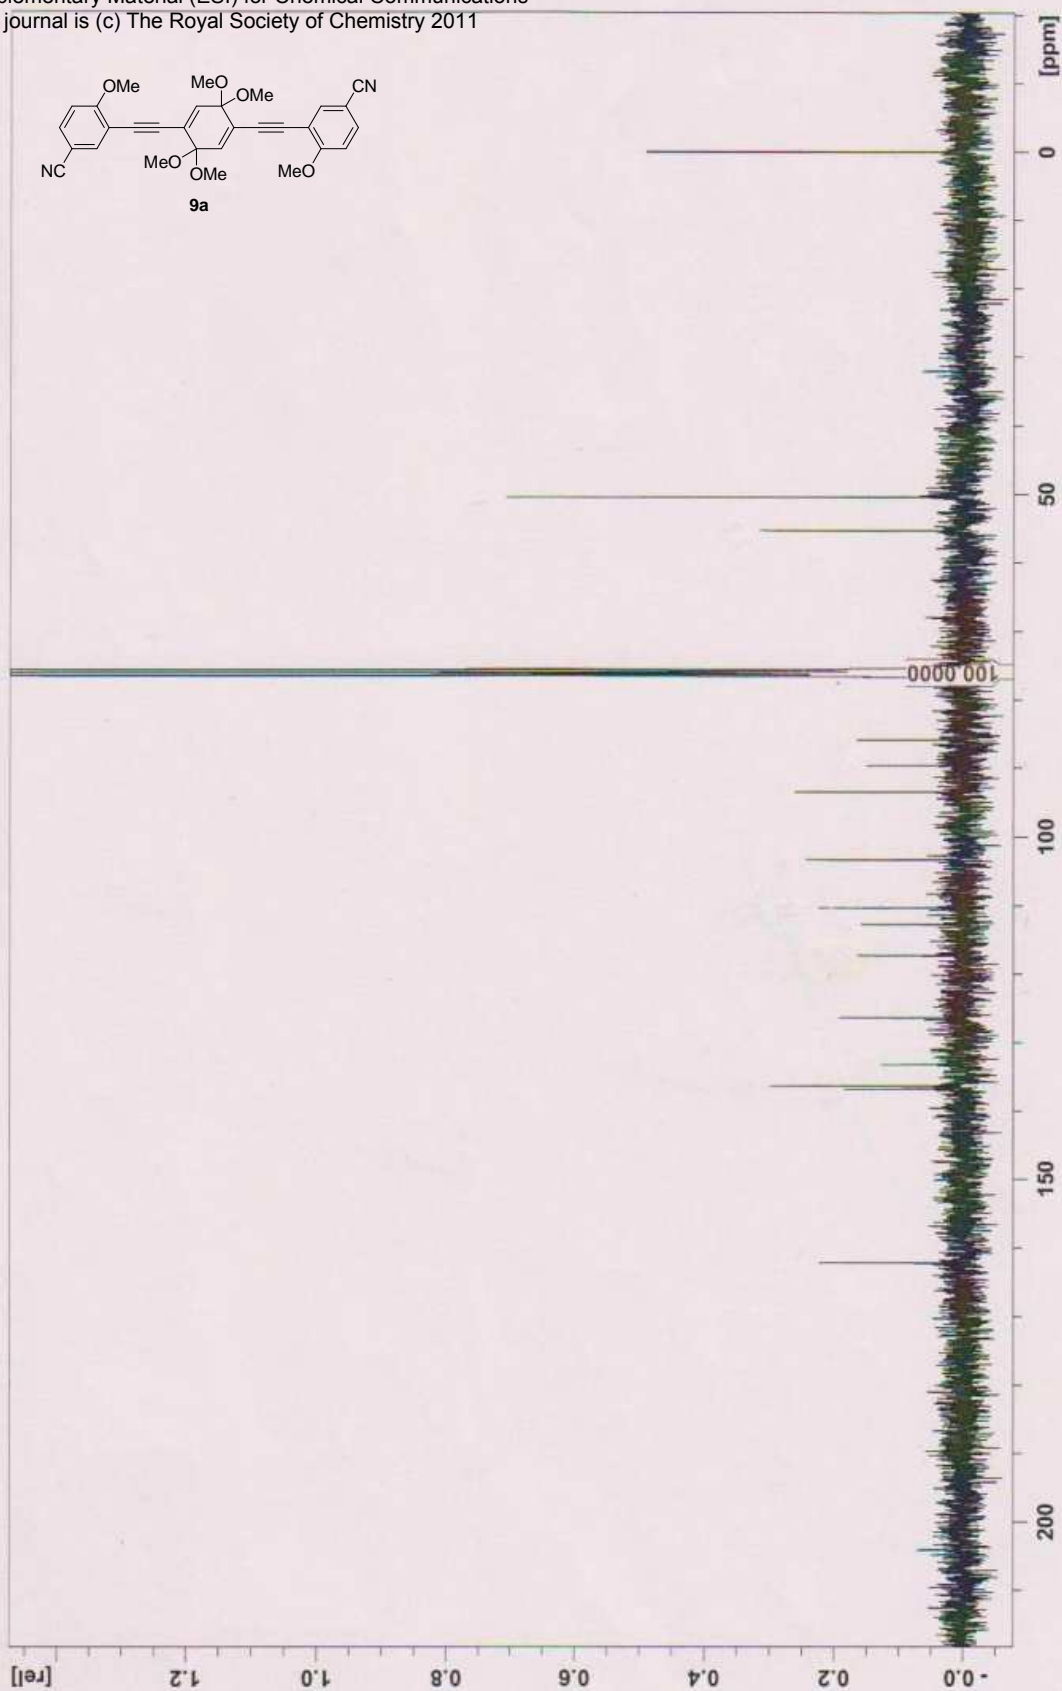

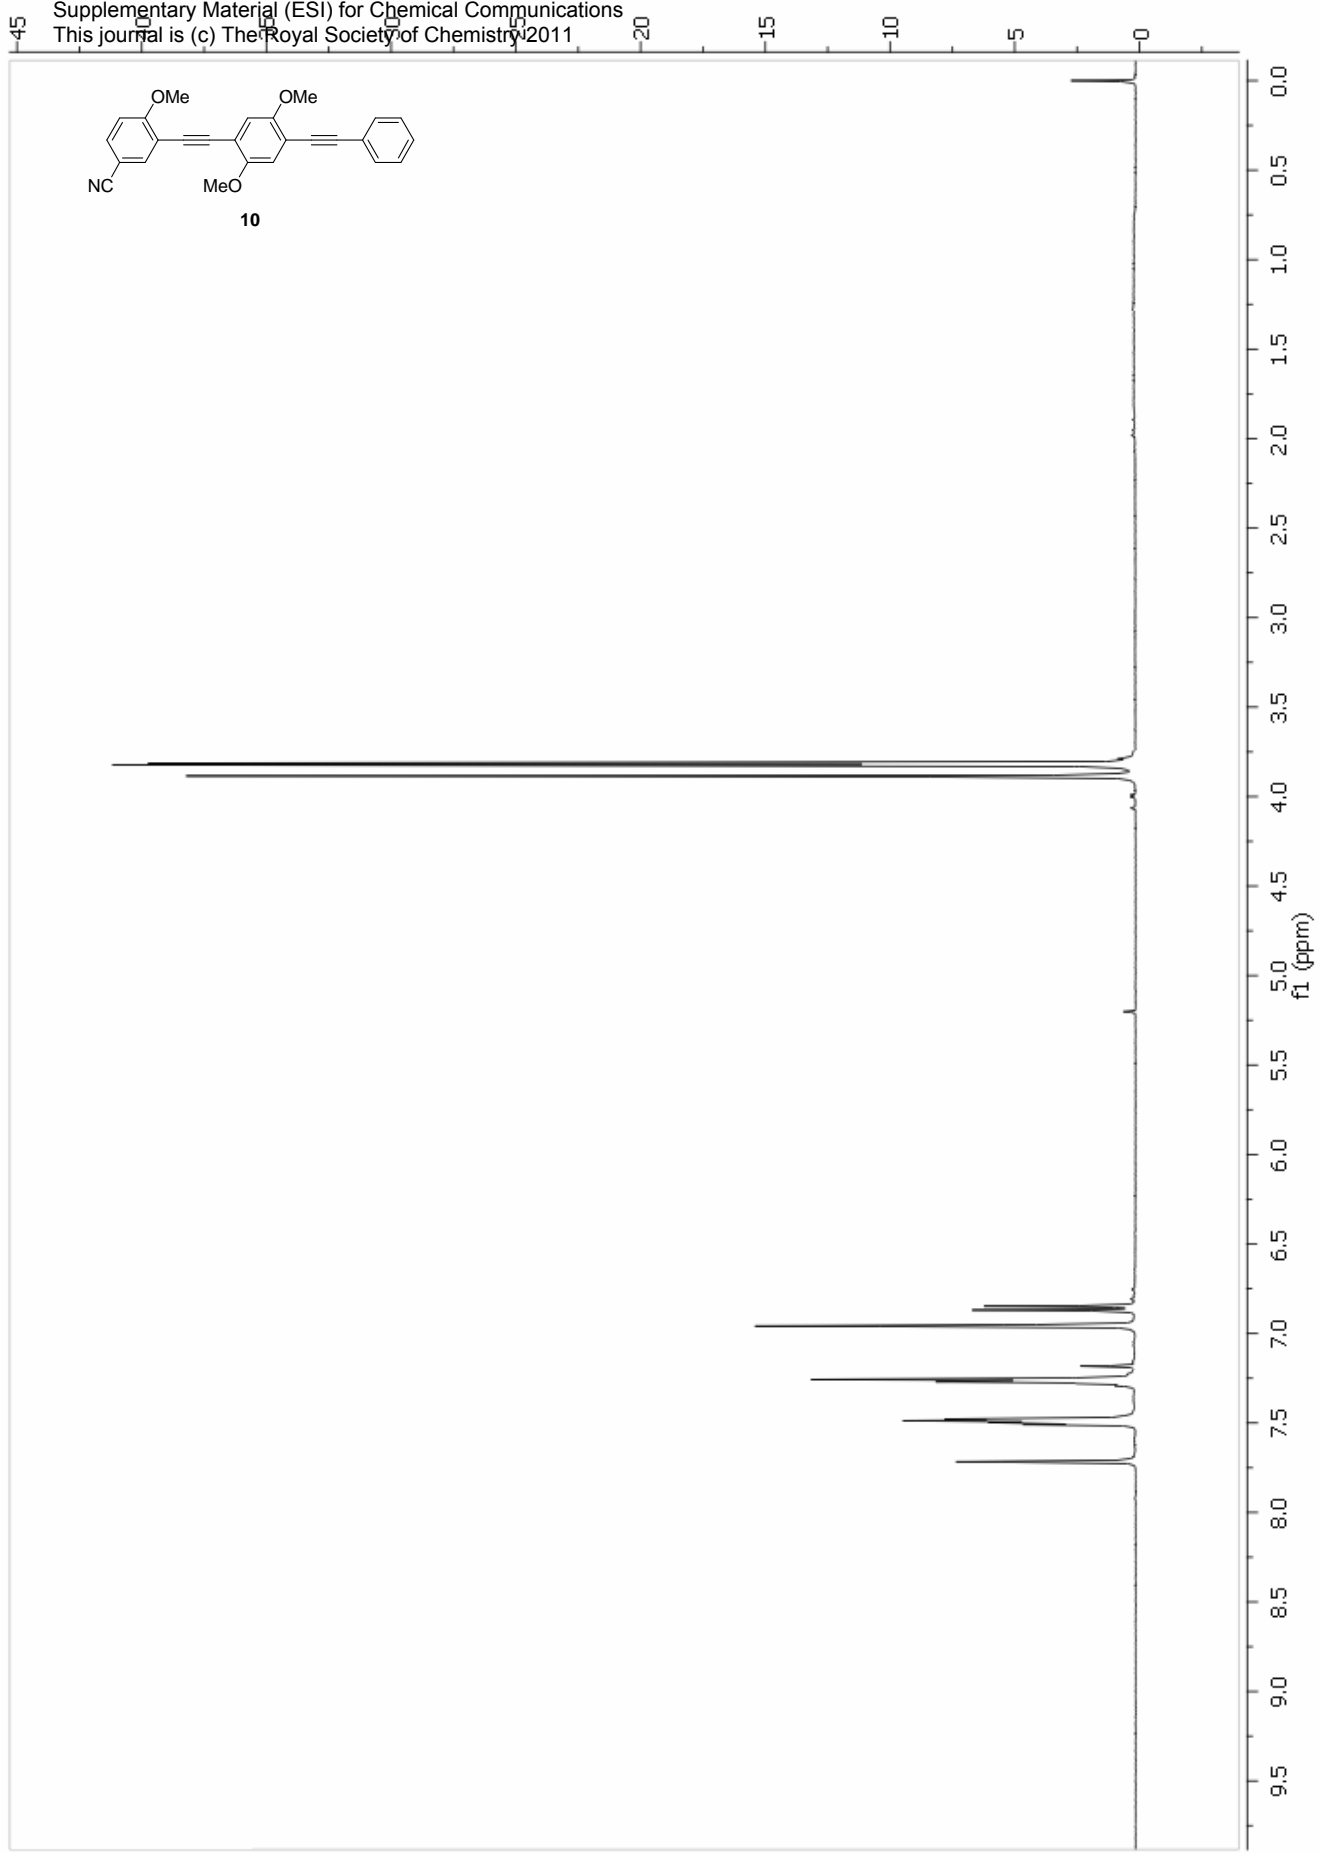



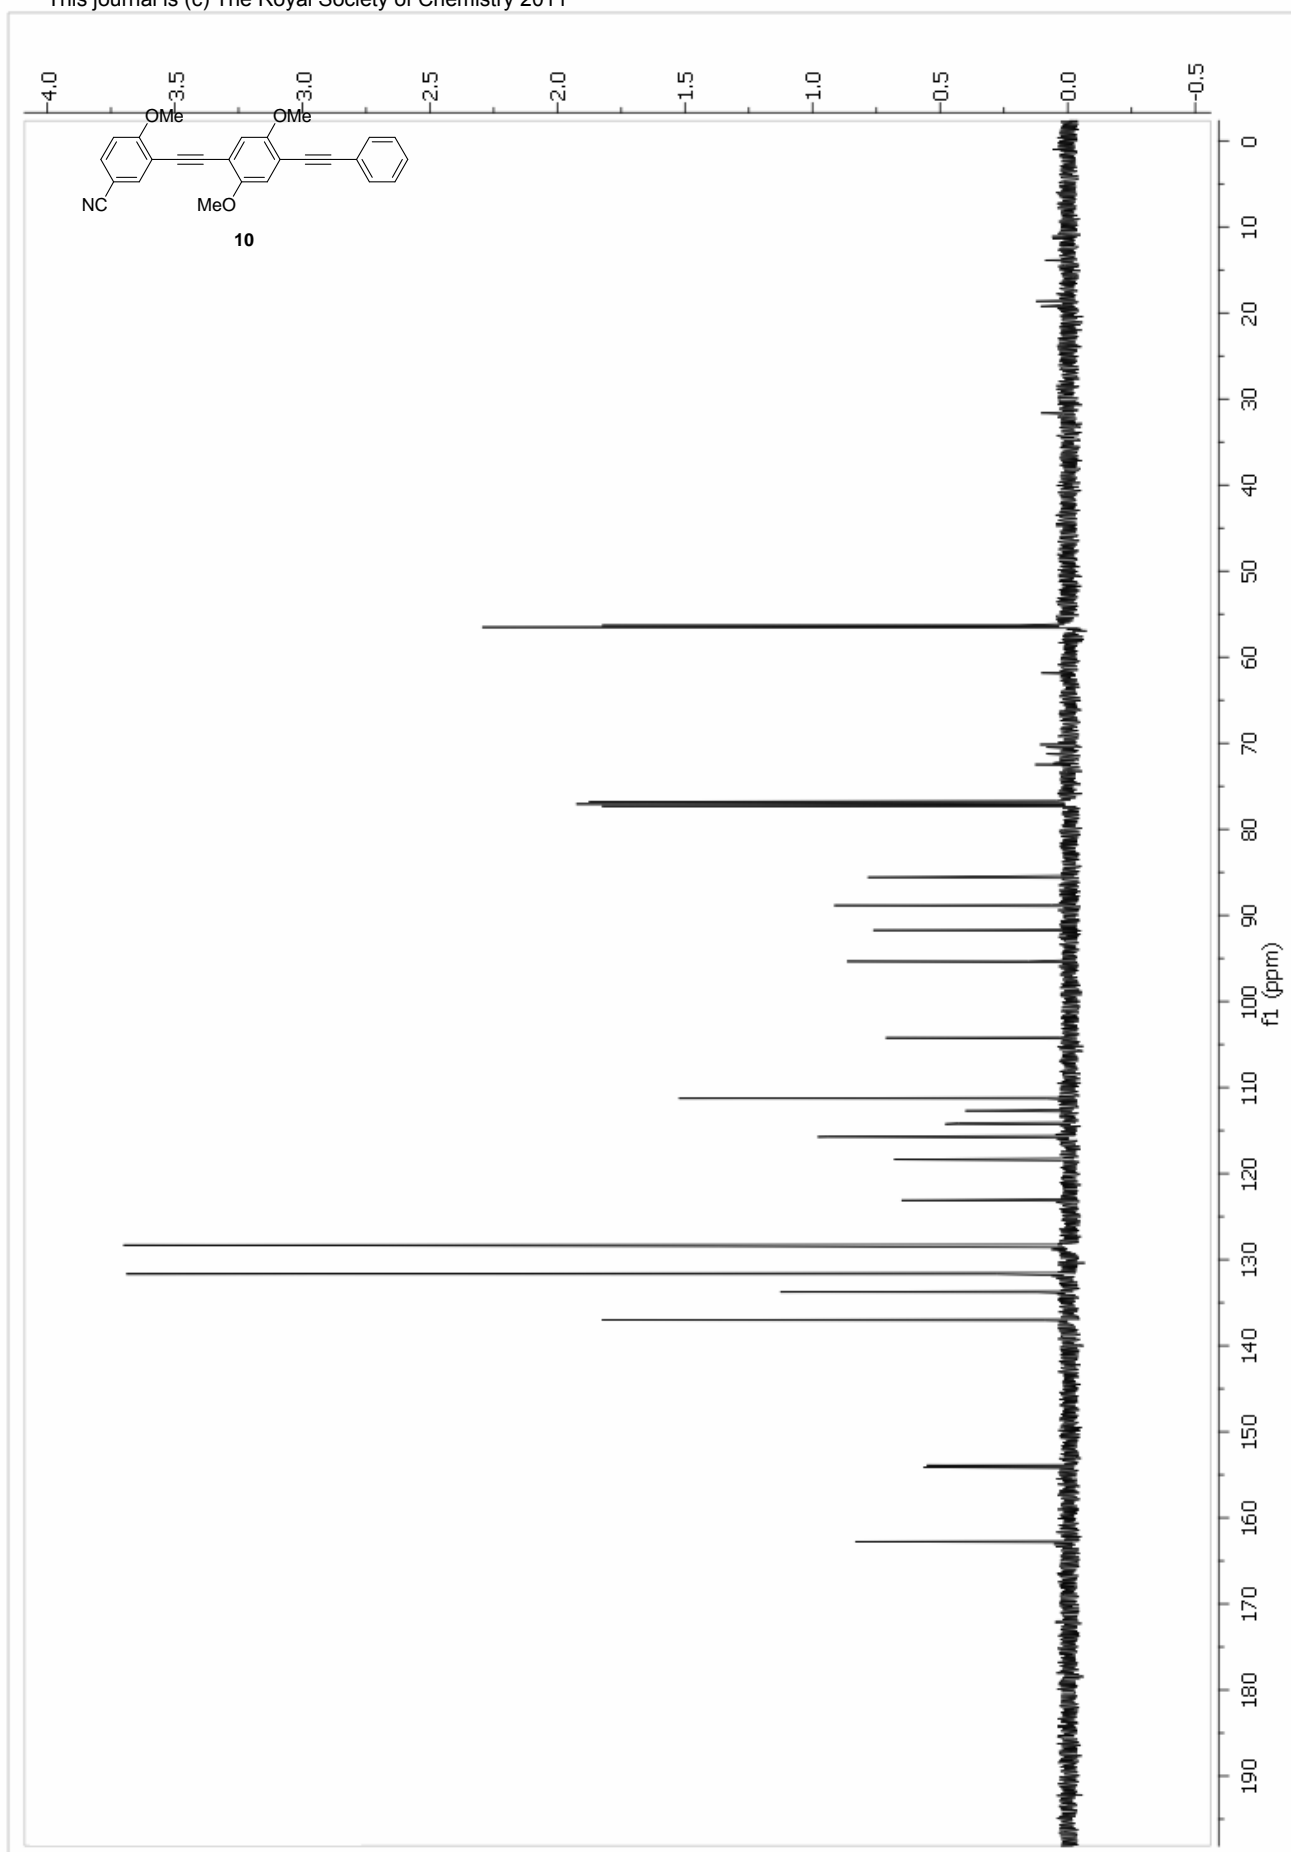

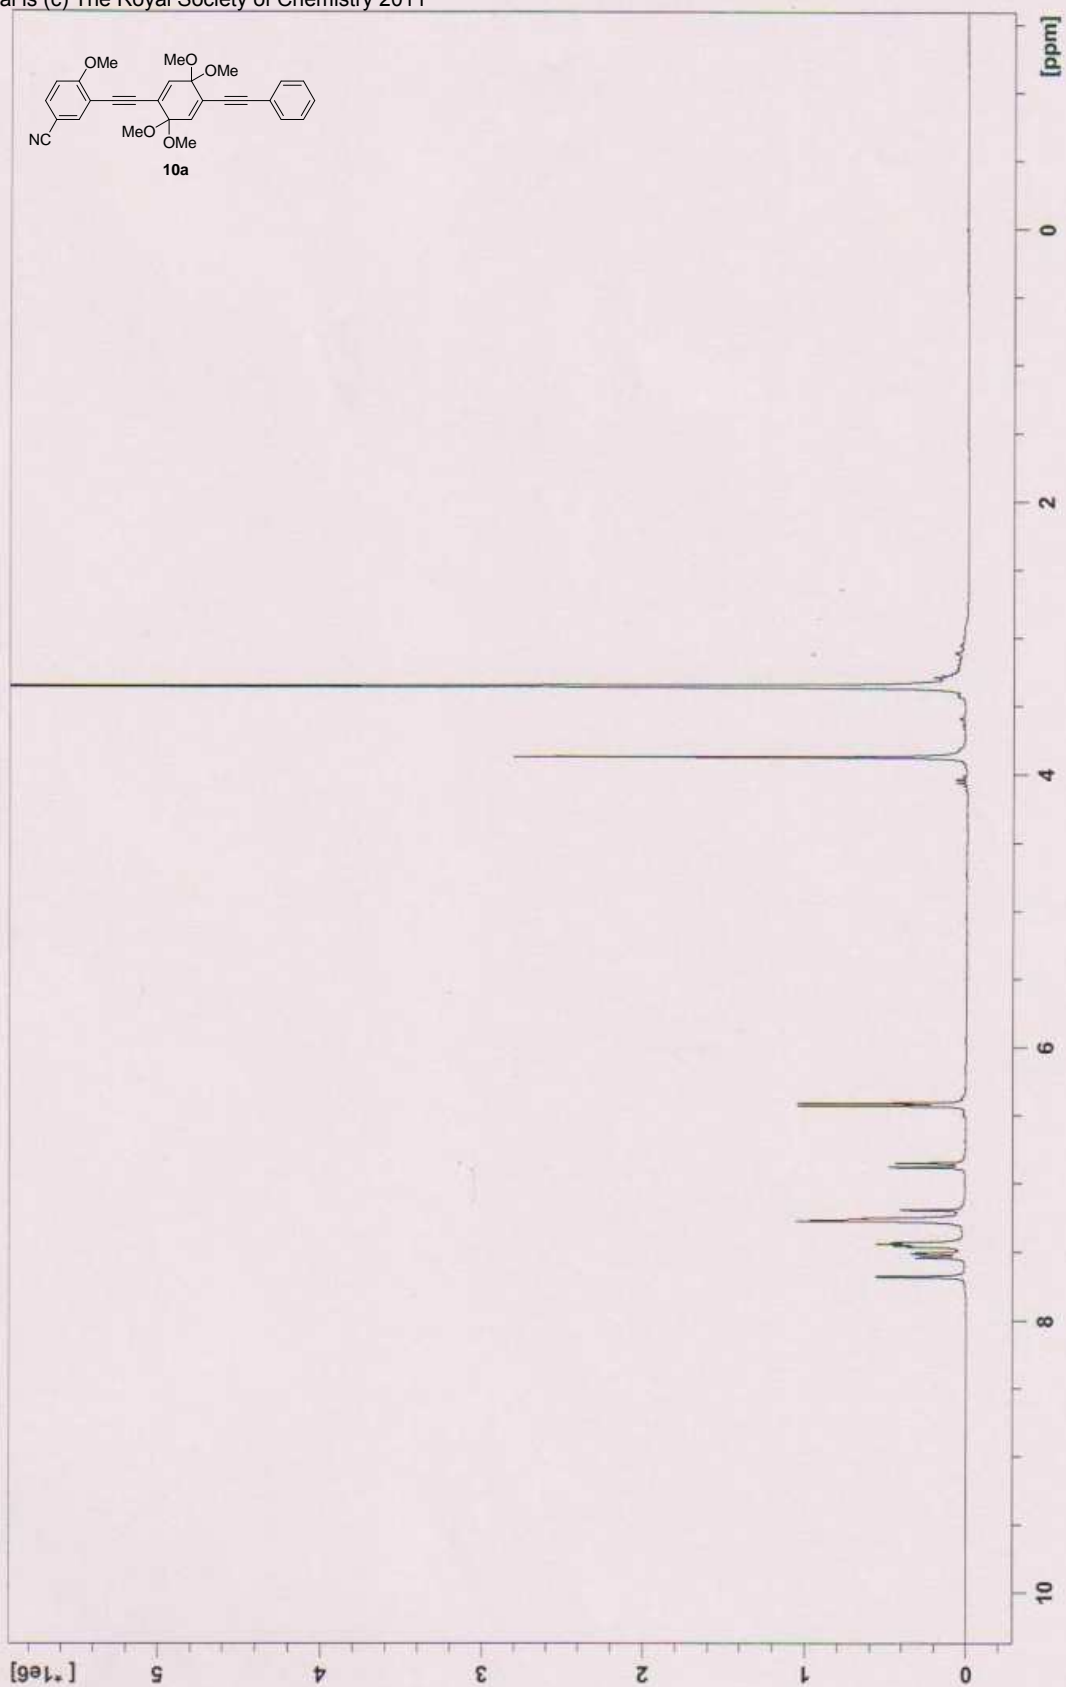

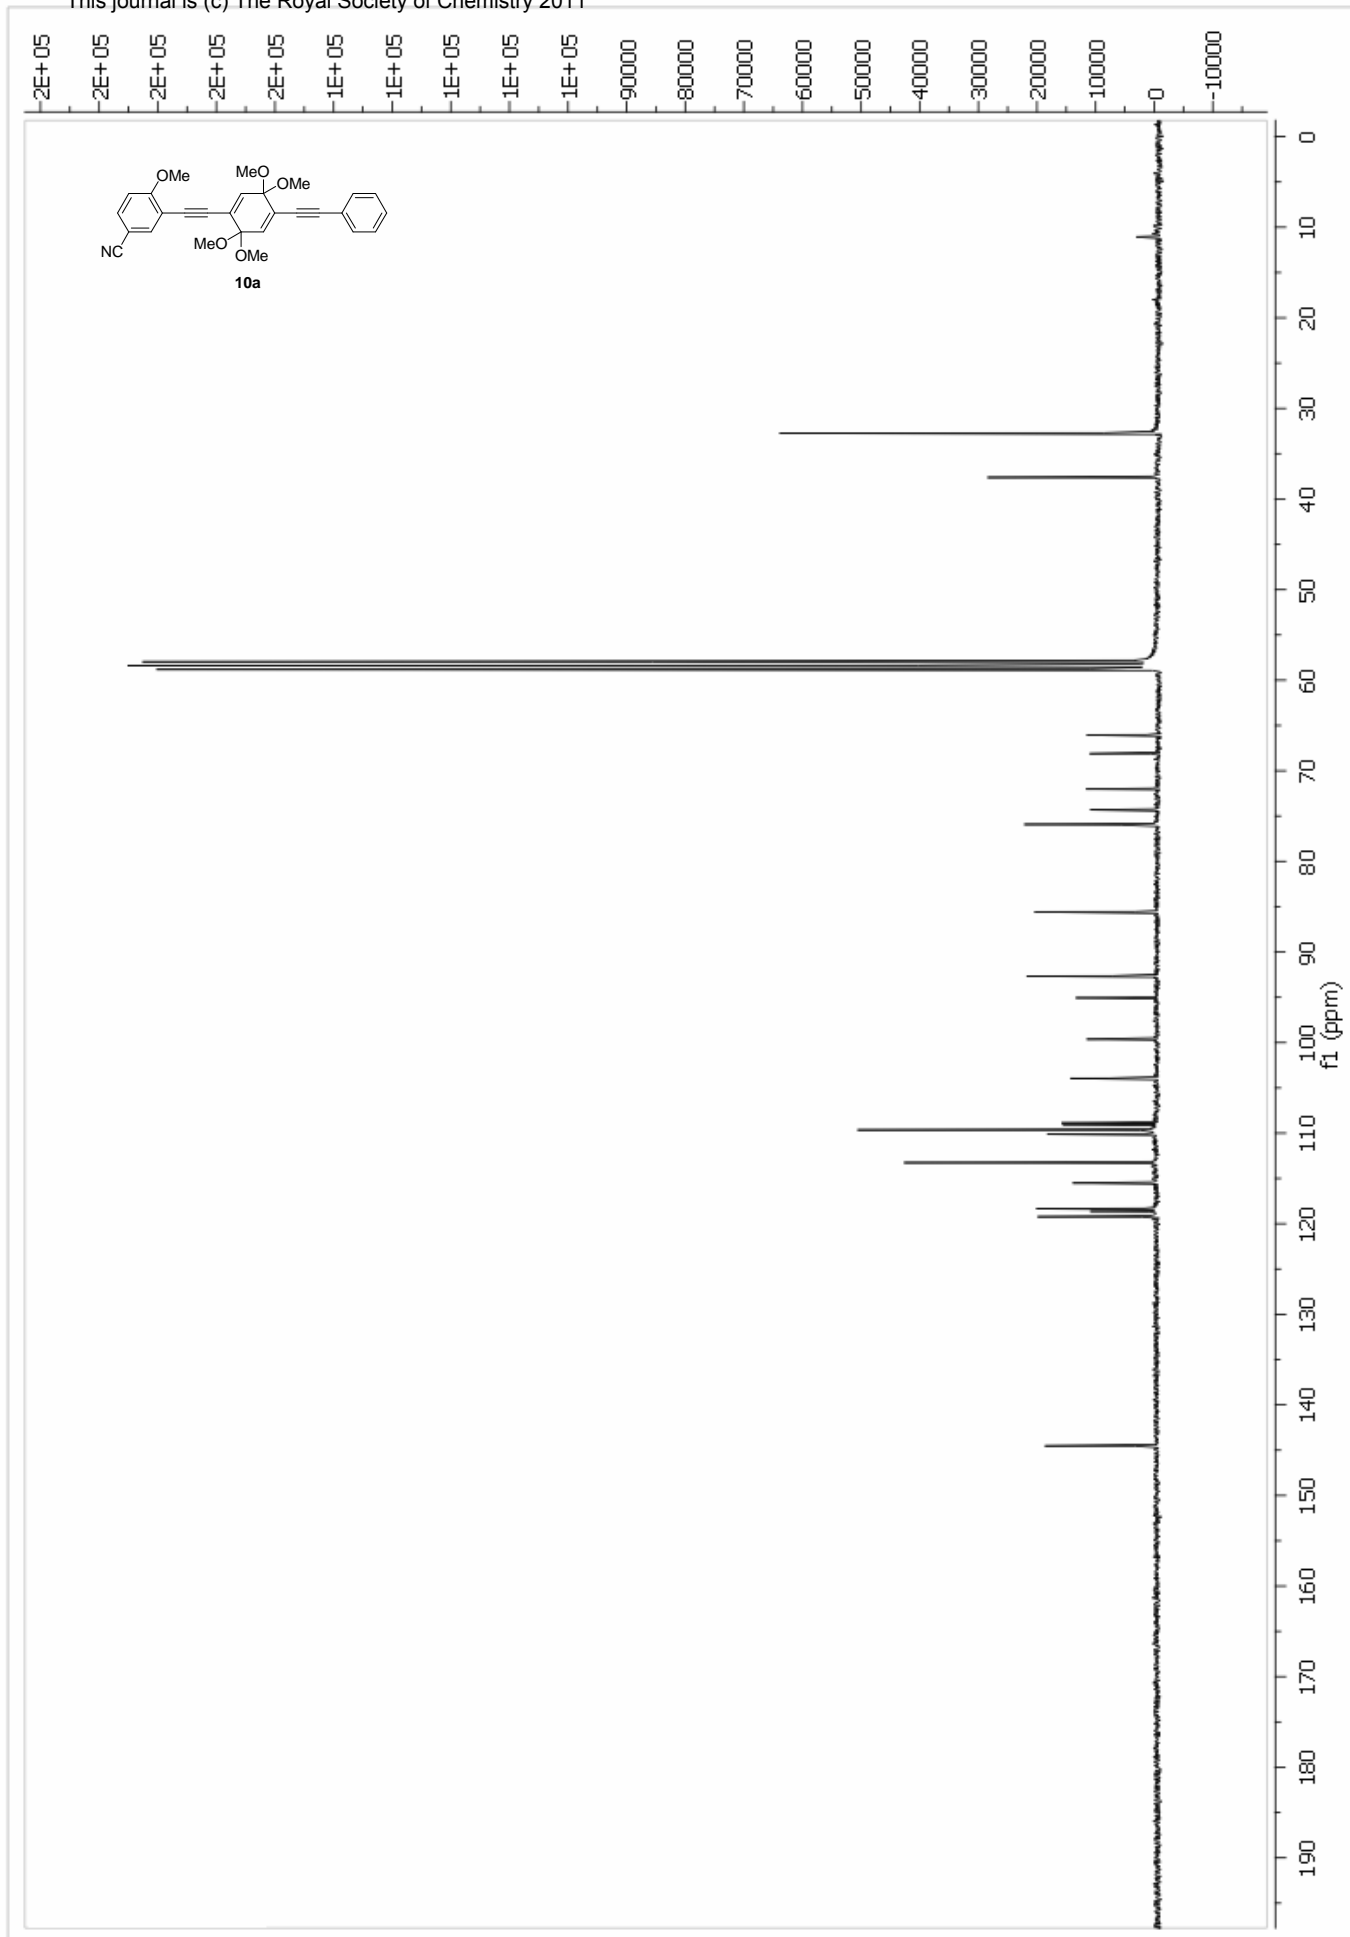

### Copies UV-vis spectra of compounds 1, 2, 5-10 and 1a-10a

UV-vis spectra were recorded using a Helyos  $\alpha$  spectrometer at  $T = 298$  K.

Concentrations of 0.0001 M in  $\text{CH}_2\text{Cl}_2$  were used.

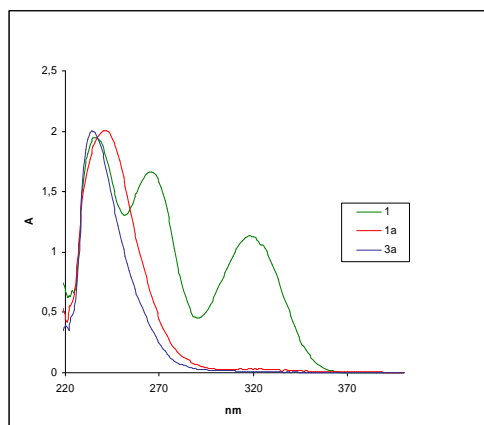

**Figure S1.** UV-vis spectra of compounds **1** (green), **1a** (red) and **3a** (blue).

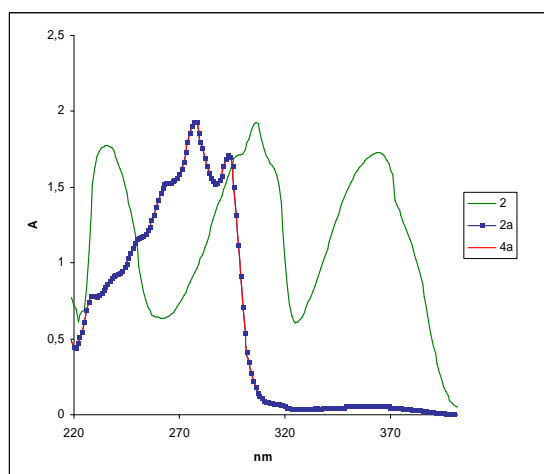

**Figure S2.** UV-vis spectra of compounds **2** (green), **2a** (blue) and **4a** (red).

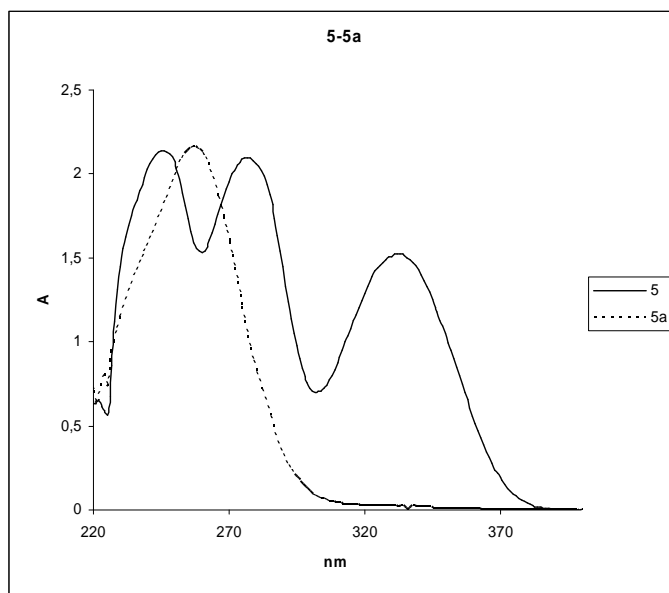

**Figure S3.** Uv-vis spectra of compounds **5** and **5a**

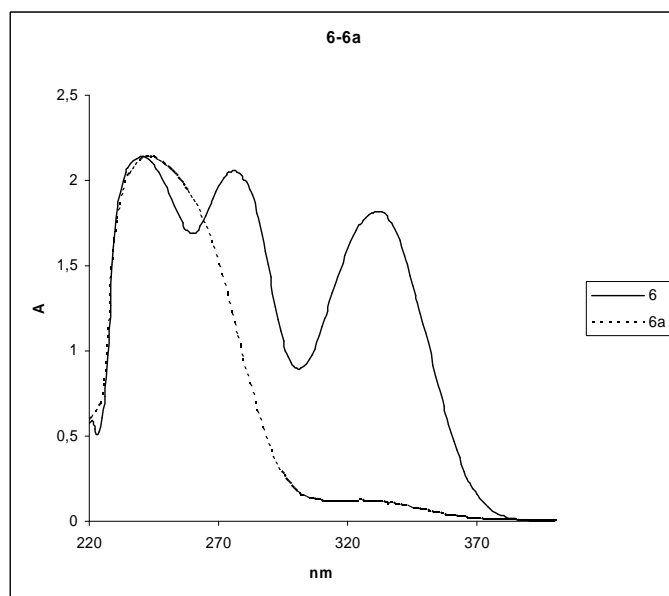

**Figure S4.** Uv-vis spectra of compounds **6** and **6a**

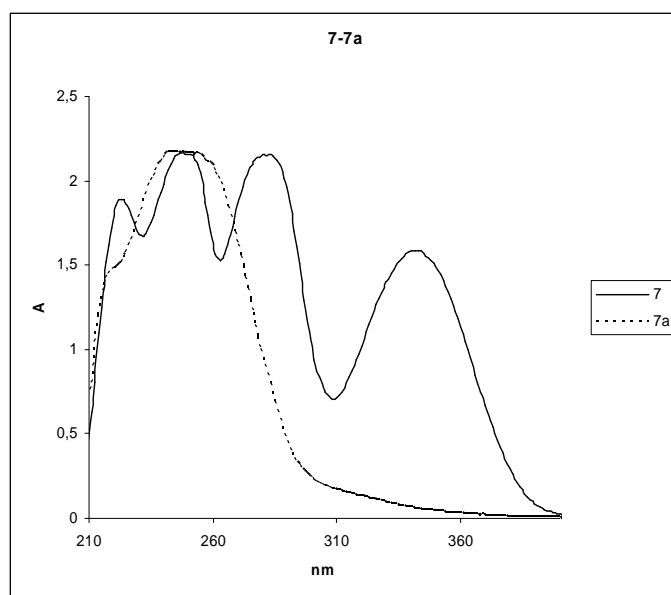

**Figure S5.** Uv-vis spectra of compounds **7** and **7a**

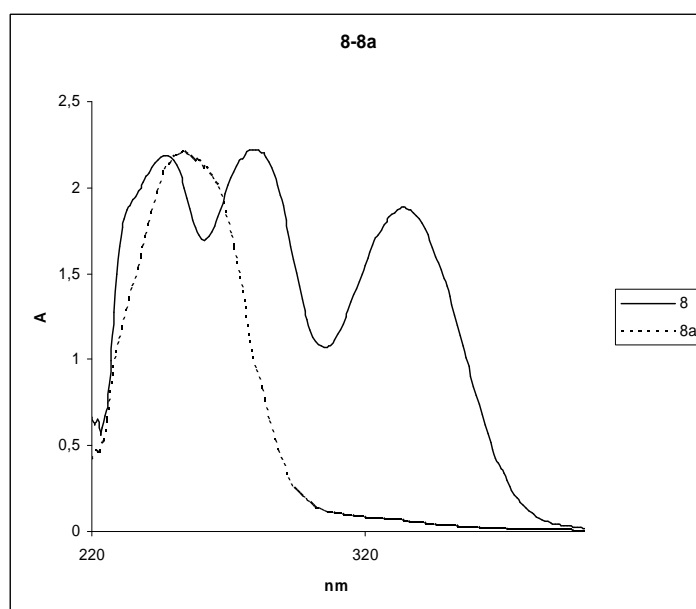

**Figure S6.** Uv-vis spectra of compounds **8** and **8a**

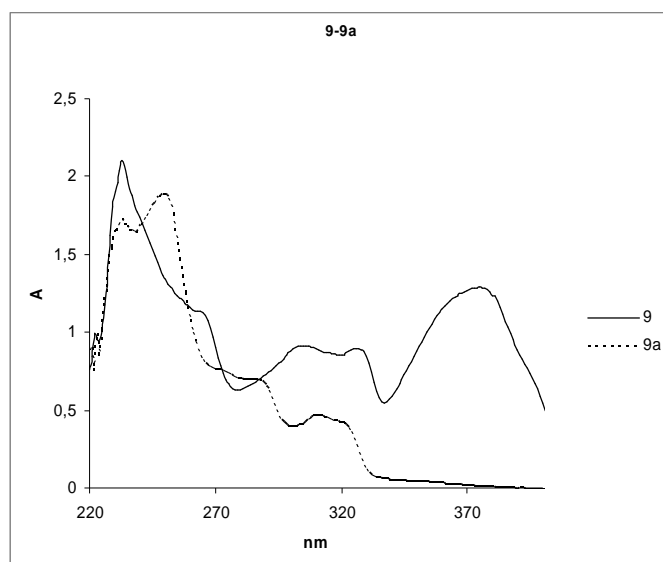

**Figure S7.** Uv-vis spectra of compounds **9** and **9a**

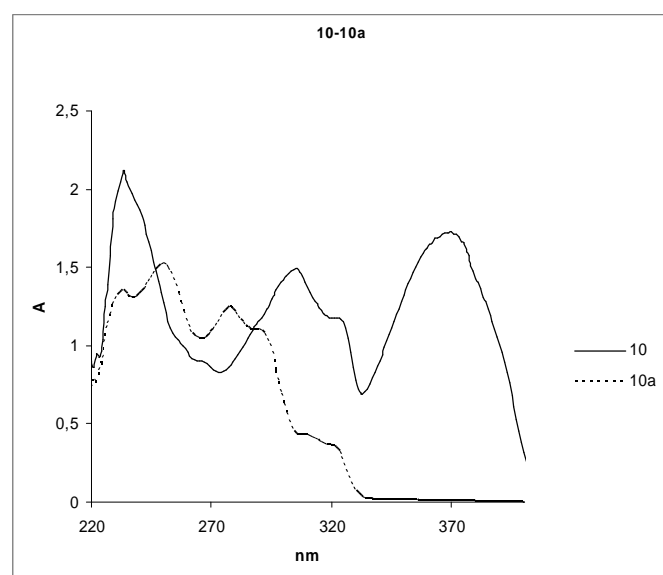

**Figure S8.** Uv-vis spectra of compounds **10** and **10a**

**Table S2.** HOMO-LUMO optical gaps for compounds **1-10**

| <b>Compound</b> | <b>UV-vis<br/><math>\lambda_{\text{max}}</math> (nm)</b> | <b>Gap (eV)</b> |
|-----------------|----------------------------------------------------------|-----------------|
| <b>1</b>        | 318                                                      | 3.92            |
| <b>1a</b>       | 241                                                      | 5.18            |
| <b>2</b>        | 364                                                      | 3.43            |
| <b>2a</b>       | 293                                                      | 4.26            |
| <b>3</b>        | 314                                                      | 3.97            |
| <b>3a</b>       | 234                                                      | 5.34            |
| <b>4</b>        | 358                                                      | 3.48            |
| <b>4a</b>       | 293                                                      | 4.26            |
| <b>5</b>        | 333                                                      | 3.75            |
| <b>5a</b>       | 257                                                      | 4.86            |
| <b>6</b>        | 331                                                      | 3.77            |
| <b>6a</b>       | 242                                                      | 5.16            |
| <b>7</b>        | 343                                                      | 3.64            |
| <b>7a</b>       | 257                                                      | 4.86            |
| <b>8</b>        | 337                                                      | 3.70            |
| <b>8a</b>       | 254                                                      | 4.91            |
| <b>9</b>        | 375                                                      | 3.33            |
| <b>9a</b>       | 250                                                      | 4.99            |
| <b>10</b>       | 370                                                      | 3.37            |
| <b>10a</b>      | 278                                                      | 4.49            |



## Cyclic voltammetry

Electrochemical cyclic and square-wave voltammetry (CV and SWV, respectively) measurements were carried out with an Ecochemie PGSTAT30 electrochemistry system in a three electrode cell under nitrogen atmosphere in anhydrous deoxygenated acetonitrile containing 0.15 M tetrabutylammonium hexafluorophosphate (TBAPF<sub>6</sub>) as supporting electrolyte. Polycrystalline Pt was used as working electrode; the counter electrode was a Pt gauze and the reference electrode was a silver wire quasi-reference electrode. Ferrocene (Fc) was added after a series of experiments and used as internal standard; all potentials in this work are referred to the Fc<sup>+</sup>/Fc couple.

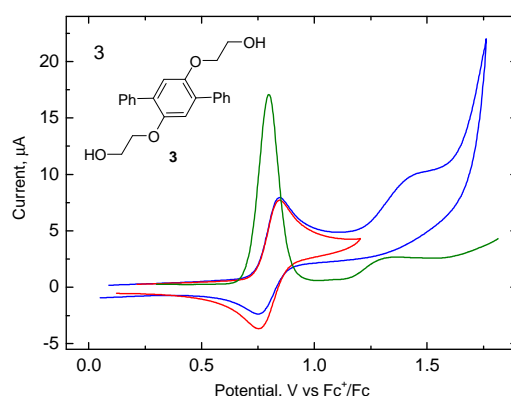

**Figure S9.** Cyclic and square wave voltammograms for the oxidation of a solution of **3** in acetonitrile containing 0.15 M TBAPF<sub>6</sub> at 25°C on a Pt working electrode. CV:  $v = 0.1 \text{ Vs}^{-1}$  with different positive switching potentials (blue and red). SWV: scan increment = 2 mV, SW amplitude = 25 mV, frequency = 15 Hz (green).

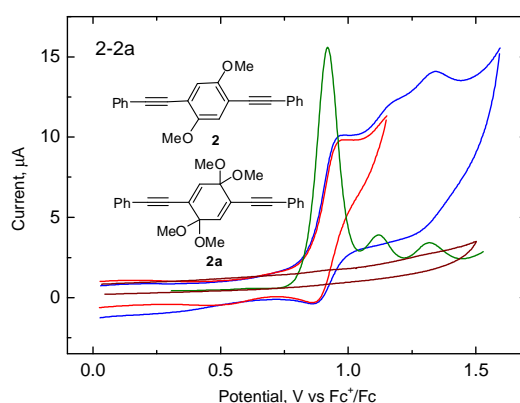

**Figure S10.** Cyclic and square wave voltammograms for the oxidation of a solution of **2** in acetonitrile containing 0.15 M TBAPF<sub>6</sub> at 25°C on a Pt working electrode. CV:  $v = 0.1 \text{ Vs}^{-1}$  with different positive switching potentials (blue and red). SWV: scan increment = 2 mV, SW amplitude = 25 mV, frequency = 15 Hz (green). CV of a solution of **2a** is also shown (brown).

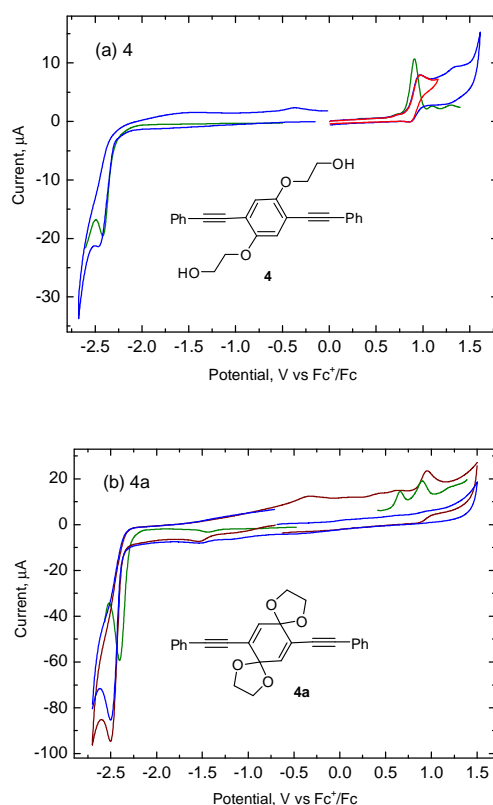

**Figure S11.** Cyclic and square wave voltammograms for the oxidation and reduction of a solution of **4** (a) and **4a** (b) in acetonitrile containing 0.15 M TBAPF<sub>6</sub> at 25°C on a Pt working electrode. (a) CV:  $v = 0.1 \text{ Vs}^{-1}$  with different positive switching potentials (blue and red). SWV: scan increment = 2 mV, SW amplitude = 25 mV, frequency = 15 Hz (green). (b) CV:  $v = 1 \text{ Vs}^{-1}$ , initial scan in the positive (blue) or in the negative (brown) direction. SWV (green): plotted signals have been fourfold enlarged, scan increment = 2 mV, SW amplitude = 25 mV, frequency = 15 Hz (reduction) or 60 Hz (oxidation). Data shown for SWV oxidation in (b) are obtained after a prior reduction scan, otherwise no peaks are observed.

Compounds **4** and **4a** show a reduction peak at -2.42 V, which probably derived from the reduction of the alkyne subunit<sup>18</sup>: We could not observe this peak in closely related structures **2** and **2a** because it is close to the detection limit using acetonitrile as solvent.

<sup>18</sup> A. Dalen, A. Nilsson and G. Hilmersson, *J. Org. Chem.* 2006, **71**, 1576-1580.

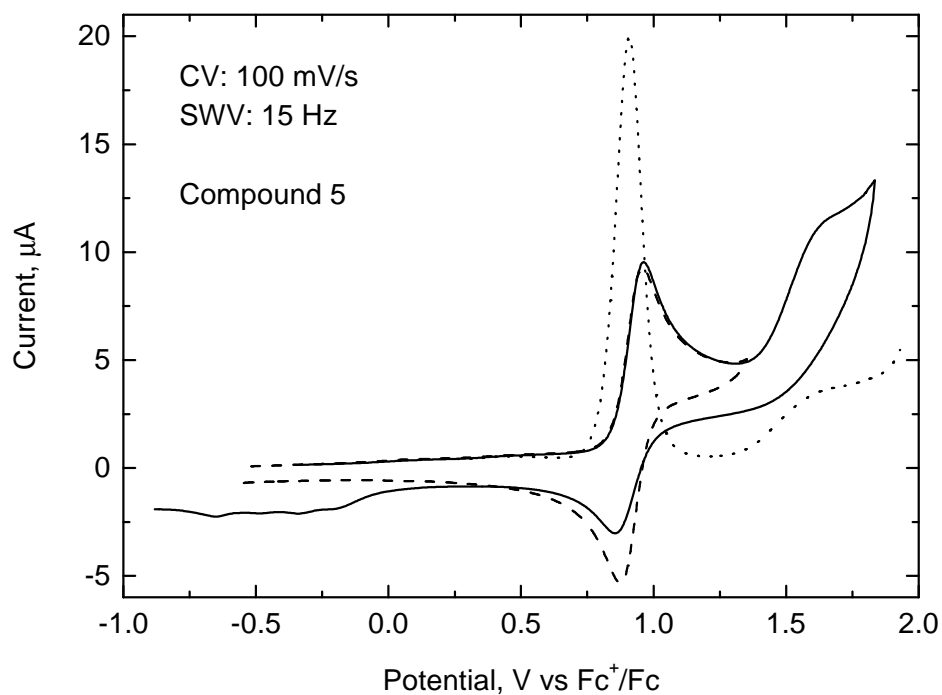

**Figure S12.** Cyclic and square wave voltammograms for the oxidation of a solution of **5** in acetonitrile containing 0.15 M TBAPF<sub>6</sub> at 25°C on a Pt working electrode. CV:  $\nu = 0.1 \text{ Vs}^{-1}$  with different positive switching potentials (— and ---). SWV: scan increment = 2 mV, SW amplitude = 25 mV, frequency = 15 Hz (···).

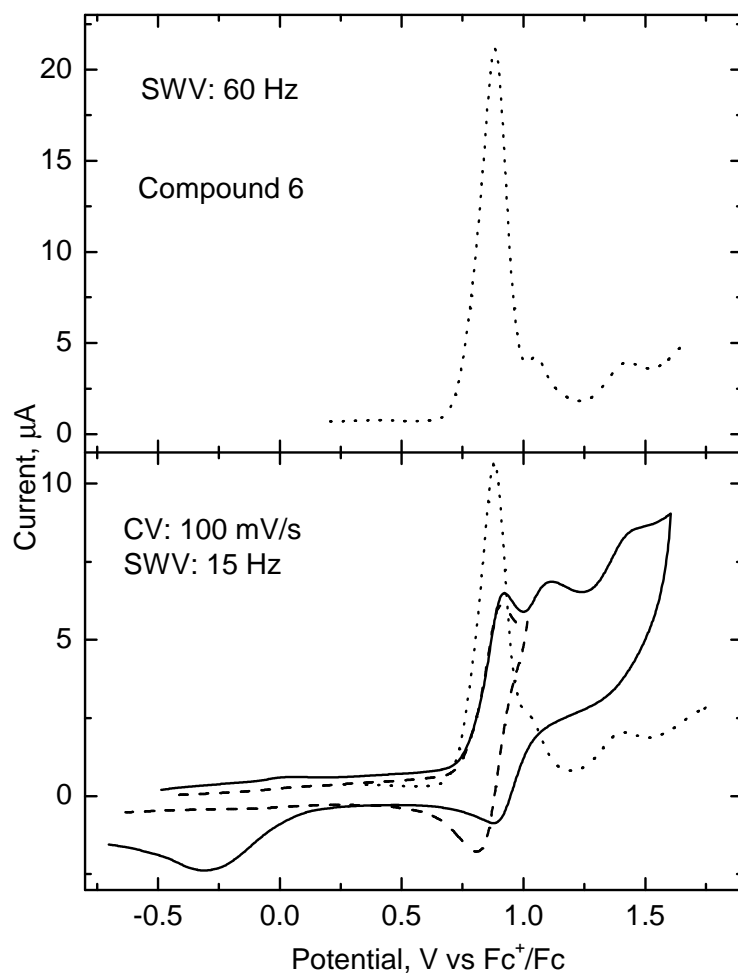

**Figure S13.** Cyclic and square wave voltammograms for the oxidation of a solution of **6** in acetonitrile containing 0.15 M TBAPF<sub>6</sub> at 25°C on a Pt working electrode. CV:  $\nu = 0.1 \text{ Vs}^{-1}$  with different positive switching potentials (— and ---). SWV: scan increment = 2 mV, SW amplitude = 25 mV, frequency = 15 Hz or 60 Hz, as indicated in the figure (···) and top panel.

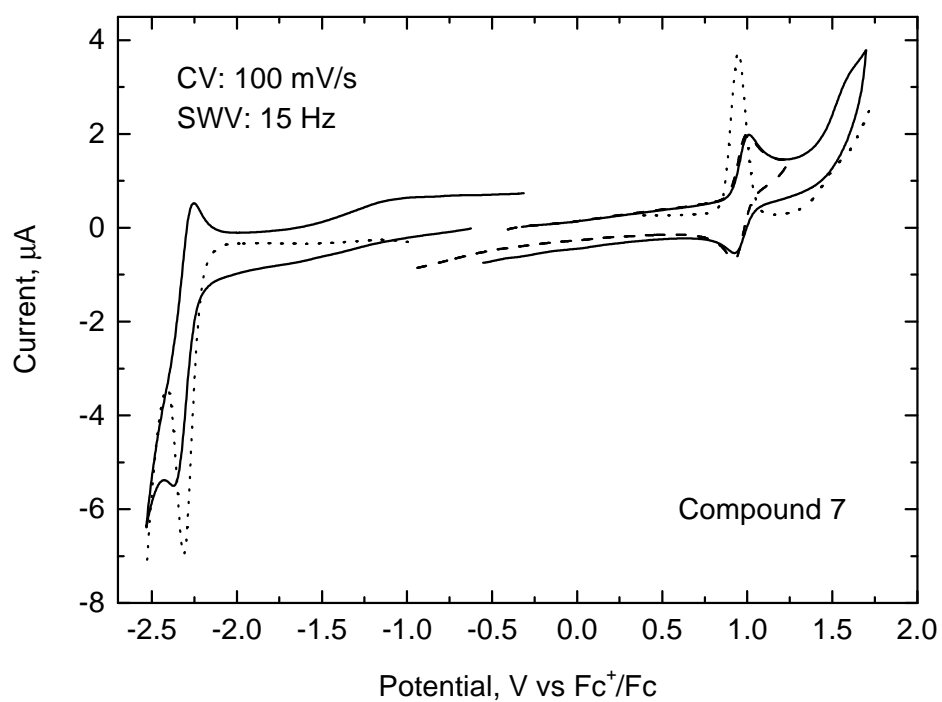

**Figure S14.** Cyclic and square wave voltammograms for the oxidation and the reduction of a solution of **7** in acetonitrile containing 0.15 M TBAPF<sub>6</sub> at 25°C on a Pt working electrode. CV:  $v = 0.1 \text{ Vs}^{-1}$  with different positive switching potentials (— and ---). SWV: scan increment = 2 mV, SW amplitude = 25 mV, frequency = 15 Hz (···).

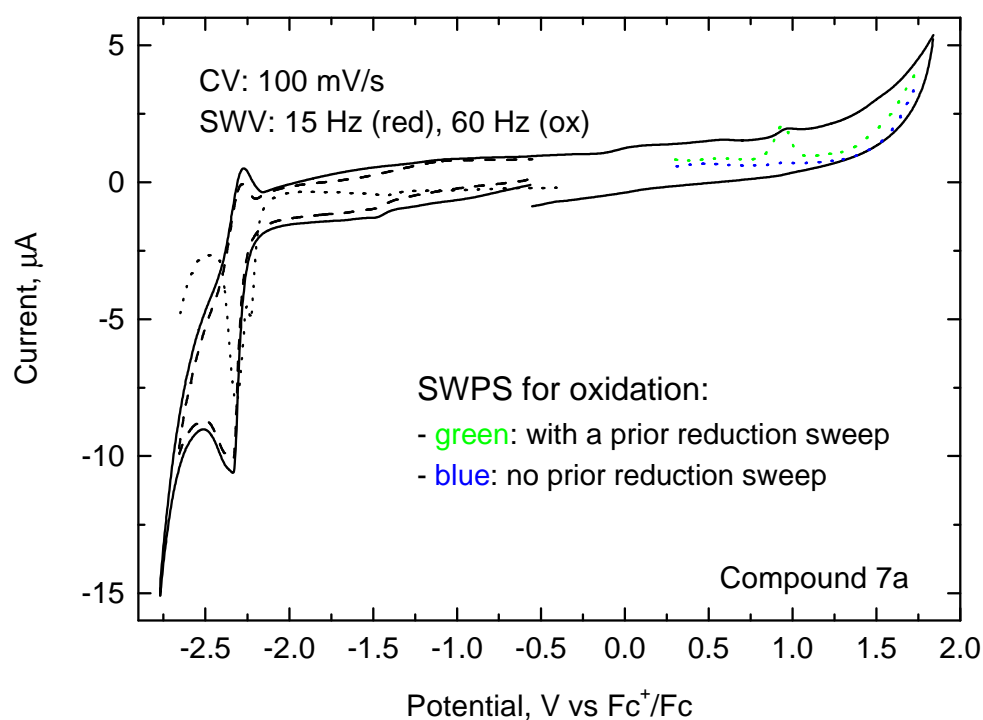

**Figure S15.** Cyclic and square wave voltammograms for the reduction and the oxidation of a solution of **7a** in acetonitrile containing 0.15 M TBAPF<sub>6</sub> at 25°C on a Pt working electrode. CV:  $v = 0.1 \text{ Vs}^{-1}$  with different switching potentials (— and ---). SWV: scan increment = 2 mV, SW amplitude = 25 mV, frequency = 15 Hz (for reduction), 60 Hz (for oxidation) (···).

Compound **7** shows a reduction peak at -2.31 V, assigned to the reduction of the aromatic nitrile groups.<sup>19</sup> We could detect again a reduction peak corresponding to the nitrile reduction at -2.31 V of bisnitrile **7a**.

<sup>19</sup> A. M. Romanin, A. Gennaro and E. Vianello, *J. Electroanal. Chem.* 1978, **88**, 175-185.

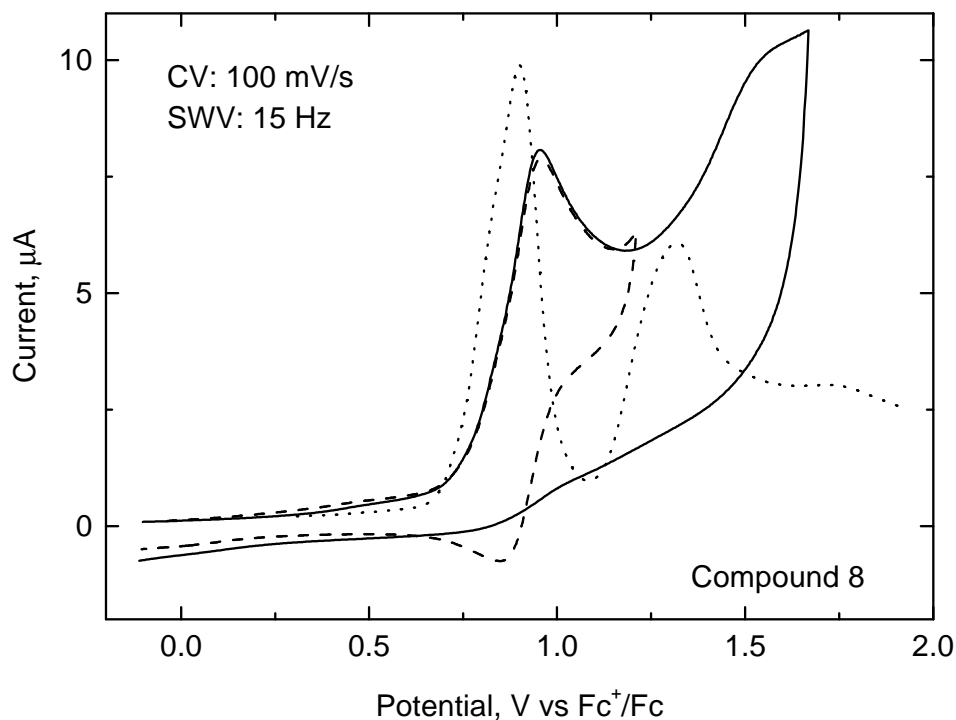

**Figure S16.** Cyclic and square wave voltammograms for the oxidation of a solution of **8** in acetonitrile containing 0.15 M TBAPF<sub>6</sub> at 25°C on a Pt working electrode. CV:  $\nu = 0.1 \text{ Vs}^{-1}$  with different positive switching potentials (— and ---). SWV: scan increment = 2 mV, SW amplitude = 25 mV, frequency = 15 Hz (···).

The electrochemical behaviour of isonitrile **8** seems to be more complex than the other compounds. The first oxidation wave is composed and quasireversible, suggesting that two different processes are occurring at similar voltages. A simple explanation is the possible coordination of **8** with the electrode surface.

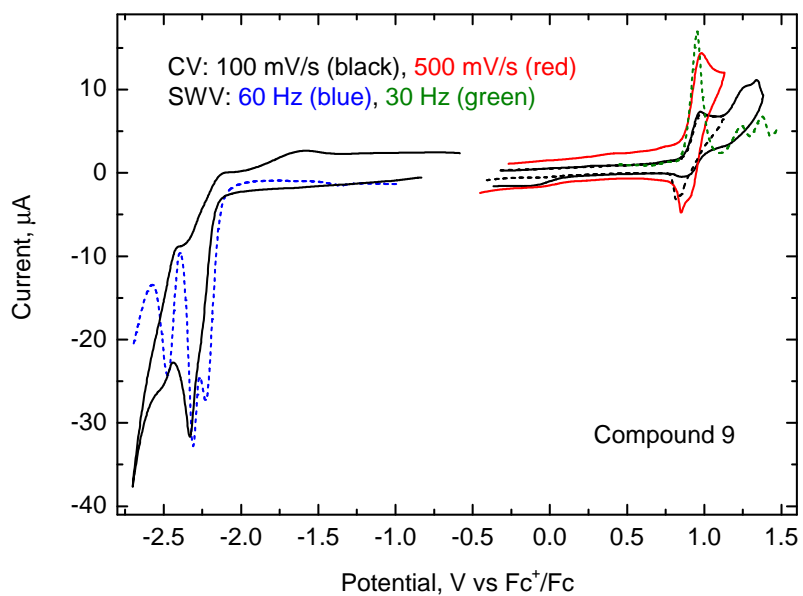

**Figure S17.** Cyclic and square wave voltammograms for the oxidation and the reduction of a solution of **9** in acetonitrile containing 0.15 M TBAPF<sub>6</sub> at 25°C on a Pt working electrode. CV:  $\nu = 0.1 \text{ Vs}^{-1}$  with different positive switching potentials (— and --- black), and  $0.5 \text{ Vs}^{-1}$  (red). SWV: scan increment = 2 mV, SW amplitude = 25 mV, frequency = 30 Hz and 60 Hz, as indicated (---).



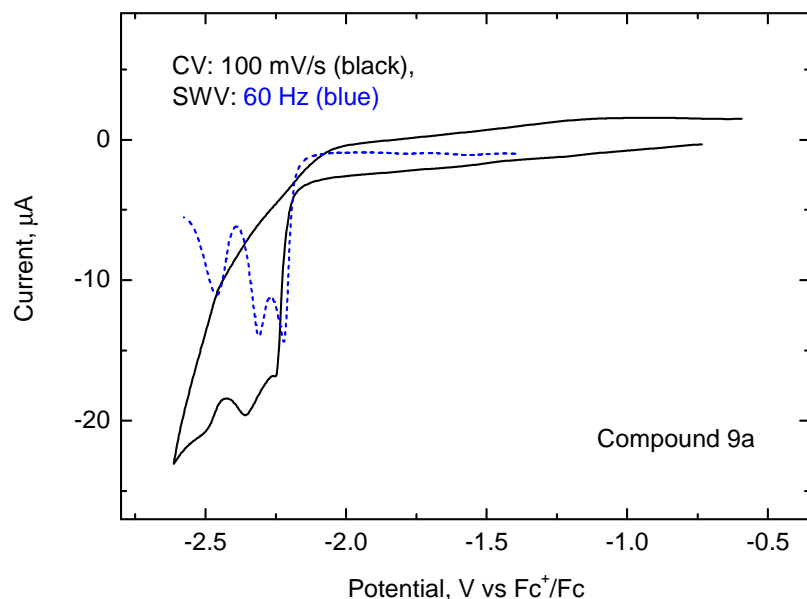

**Figure S18.** Cyclic and square wave voltammograms for the reduction of a solution of **9a** in acetonitrile containing 0.15 M TBAPF<sub>6</sub> at 25°C on a Pt working electrode. CV:  $v = 0.1 \text{ Vs}^{-1}$  (—). SWV: scan increment = 2 mV, SW amplitude = 25 mV, frequency = 60 Hz (··· blue).

In the CV of the oxidation of compound **9** we can also observe a small peak in the reverse sweep at +0.82 V, which can be related with adsorption processes of the molecule on the electrode. The absence of this peak in the other compounds may be related with favoured stapled adsorptions of these molecules owing to the presence of two nitrile groups in *meta* position.

We can also observe (much better resolved in SWV) cathodic peaks corresponding to the reduction of nitrile (-2.22, -2.30 V) and alkyne (-2.47 V) functionalities. Taking into account that compound **9** is symmetric, the presence of the two reduction peaks of nitrile groups can be again related with adsorption processes. A possible electronic coupling is dismissed because similar peaks are observed in oxidized compound **9a**.

As expected based on the CV and SWV of compound **9**, three cathodic peaks corresponding to the reduction of nitrile (-2.22, -2.28 V) and alkyne (-2.47 V) functionalities could be observed.

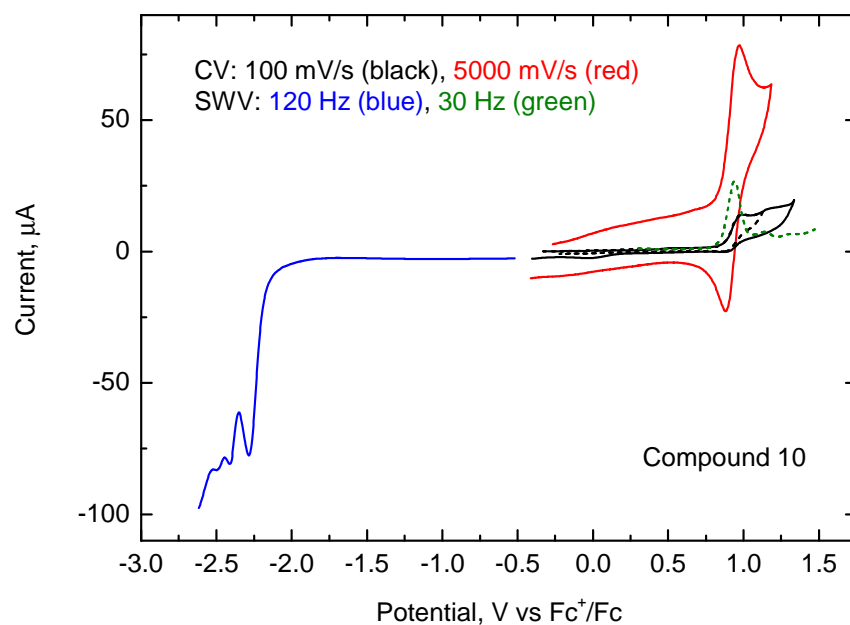

**Figure S19.** Cyclic and square wave voltammograms for the oxidation and the reduction of a solution of **10** in acetonitrile containing 0.15 M TBAPF<sub>6</sub> at 25°C on a Pt working electrode. CV:  $\nu = 0.1 \text{ Vs}^{-1}$  with different positive switching potentials (— and --- black), and  $5 \text{ Vs}^{-1}$  (red). SWV: scan increment = 2 mV, SW amplitude = 25 mV, frequency = 30 Hz (green) and 120 Hz (blue), as indicated.

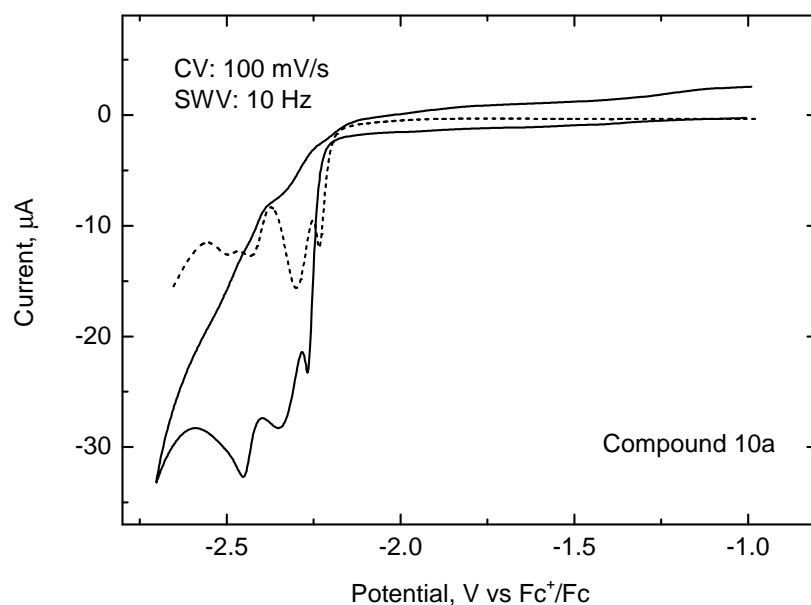

**Figure S20.** Cyclic and square wave voltammograms for the reduction of a solution of **10a** in acetonitrile containing 0.15 M TBAPF<sub>6</sub> at 25°C on a Pt working electrode. CV:  $\nu = 0.1 \text{ Vs}^{-1}$  (—). SWV: scan increment = 2 mV, SW amplitude = 25 mV, frequency = 10 Hz (---).

Compound **10**, having a nitrile and two non-equivalent alkyne groups, presents the corresponding three irreversible cathodic peaks at -2.28, -2.41 and -2.50 V. Beside the expected reduction peaks at -2.30, -2.41 and -2.49 V and consistently with CV and SWV of compounds **7a** and **9a**, a peak corresponding to adsorption processes is observed in compound **10a** at -2.24 V.

**Table S3.** Oxidation and reduction processes for compounds **5-10**.

| Compound               | Oxidations<br>[V] <sup>a</sup>    | Reductions [V]                         |
|------------------------|-----------------------------------|----------------------------------------|
| <b>5</b>               | 0.91 rev. 1.56 irrev.             | -                                      |
| <b>5a</b>              | -                                 | -                                      |
| <b>6</b>               | 0.88 rev. 1.05 irrev. 1.43 irrev. | -                                      |
| <b>6a</b>              | -                                 | -                                      |
| <b>7</b>               | 0.95 rev. 1.52 irrev.             | -2.31 rev                              |
| <b>7a<sup>b</sup></b>  | -                                 | -2.31 rev                              |
| <b>8</b>               | 0.90 quasirev. 1.31 irrev.        | -                                      |
| <b>8a</b>              | -                                 | -                                      |
| <b>9</b>               | 0.95 rev. 1.24 irrev. 1.37 irrev. | -2.22 irrev. -2.30 irrev. -2.47 irrev. |
| <b>9a</b>              | -                                 | -2.22 irrev. -2.28 irrev. -2.47 irrev. |
| <b>10</b>              | 0.94 rev. 1.14 irrev. 1.34 irrev. | -2.28 irrev. -2.41 irrev. -2.50 irrev. |
| <b>10a<sup>c</sup></b> | -                                 | -2.30 irrev. -2.41 irrev. -2.49 irrev. |

<sup>a</sup> In acetonitrile containing 0.15 M TBAPF<sub>6</sub> at 25 °C on a Pt working electrode. E values measured versus E<sub>1/2</sub> of the internal reference ferrocenium/ferrocene (Fc<sup>+</sup>/Fc). Data taken from SWV measurements. <sup>b</sup> A minor peak at -2.27 V could also be observed. <sup>c</sup> A minor peak at -2.24 V could also be observed

### HOMO-LUMO electrochemical gaps for compounds 1-10

The CV of compounds **1-3**, **5-6** and **8**, did not present reduction peaks because the solvent was reduced at a lower voltage. Consequently, for these structures we could only assign an electrochemical HOMO-LUMO gap higher than 3.30 eV.

In the oxidized compounds **1a-3a**, **5a-6a** and **8a**, the absence of oxidation and reduction peaks must be related with an electrochemical gap higher than 4.2 V. The first reduction peak was observed in structures **4**, **7**, **9** and **10**. The corresponding electrochemical gaps are 3.33, 3.26, 3.17 and 3.22 eV, respectively, whilst the gaps for the related bisketals **4a**, **7a**, **9a** and **10a** were estimated to be higher than 4.0 eV.
